# Supplementary material for: Transcription factor TFCP2L1 patterns cells in the mouse kidney collecting ducts
Source: eLife journal article supplement (doi:10.7554/elife.24265), 2017-06-03
Supplement: supp [file elife_poa_e24265_Figure_5_Supplement_1.pdf › elife_poa_e24265_Figure_5_Supplement_1.pdf]

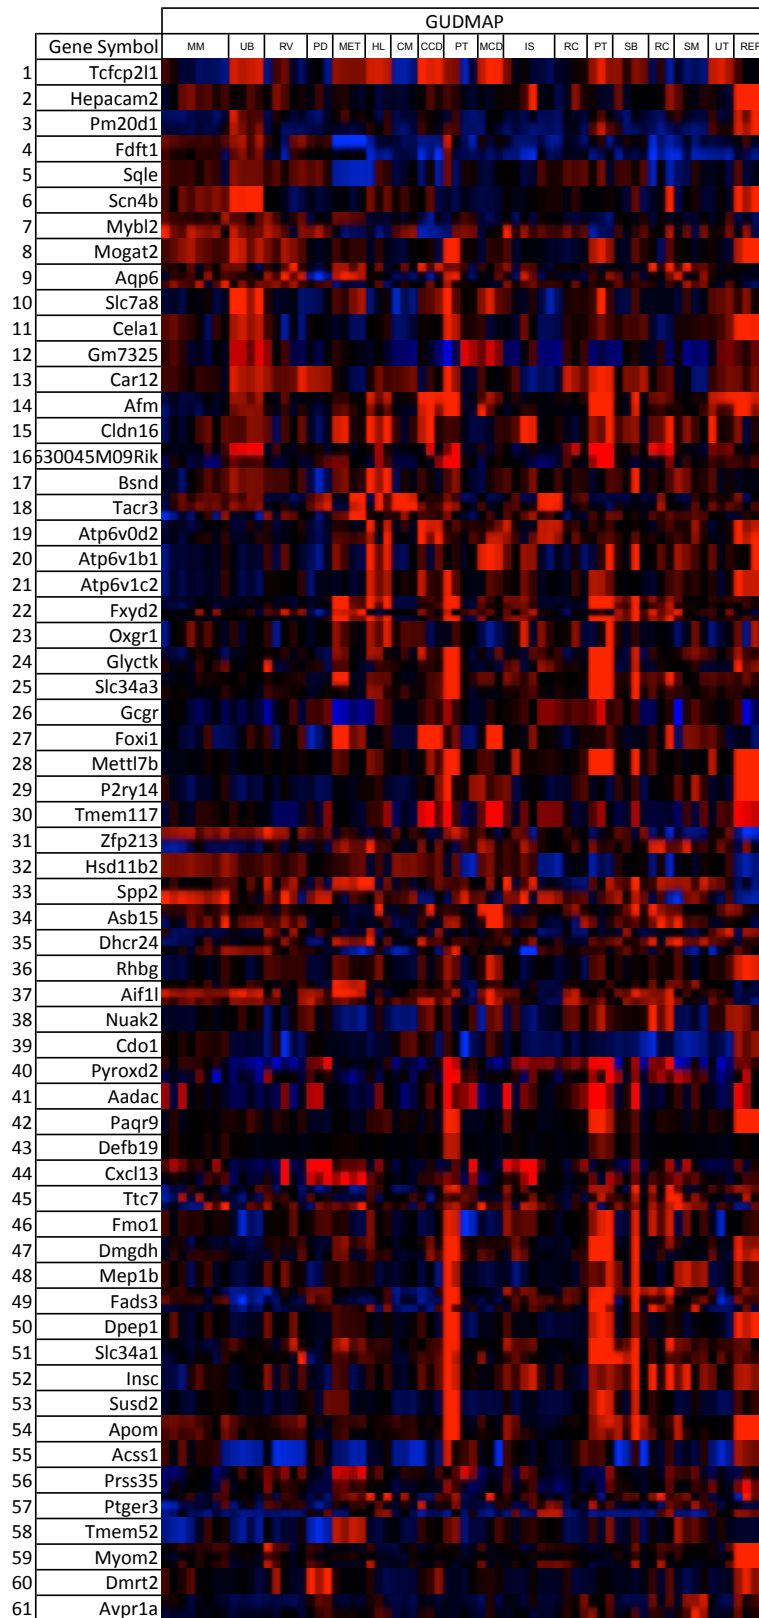

MM Metanephric Mesenchyme  
 UB Ureteric Bud  
 RV Renal Vechicle  
 PD Podocyte Layer  
 MET Metanephros  
 HL Henle Anlage  
 CM Cap Mesenchyme  
 CCD Cortical Collecting Duct  
 PT Proximal Tubule  
 MCD Medular Collecting Duct  
 IS Interstitium  
 SB S-Shaped Body  
 RC Renal Corpuscle  
 SM Smooth Muscle  
 UT Ureteric Tip  
 REF Reference
