# Supplementary material for: Transcription factor TFCP2L1 patterns cells in the mouse kidney collecting ducts
Source: eLife journal article supplement (doi:10.7554/elife.24265), 2017-06-03
Supplement: supp [file elife_poa_e24265_Figure_5_Supplement_2.pdf › elife_poa_e24265_Figure_5_Supplement_2.pdf]

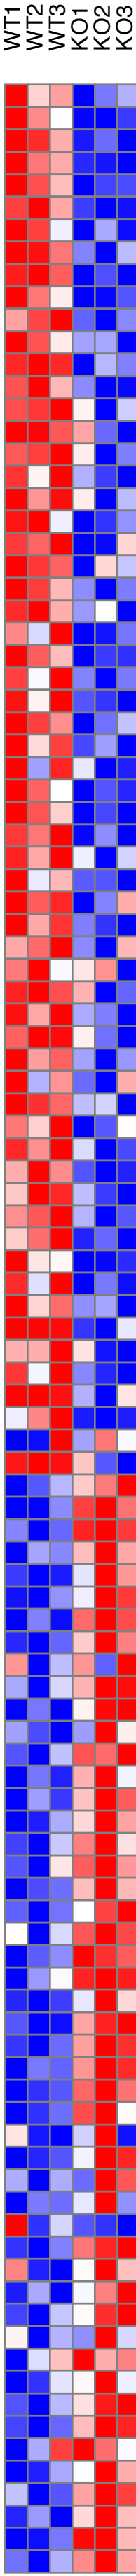

| Symbol        | P.Value   | Fold Change |
|---------------|-----------|-------------|
| Aqp6          | 0.0000515 | -8.06       |
| Hepacam2      | 0.0009967 | -3.76       |
| Atp6v0d2      | 0.0002011 | -3.72       |
| Gm7325        | 0.0000817 | -3.23       |
| Atp6v1b1      | 0.0002497 | -3.18       |
| Scn4b         | 0.0000728 | -2.86       |
| Foxi1         | 0.005111  | -2.79       |
| Hsd11b2       | 0.0005924 | -2.59       |
| Oxgr1         | 0.0000142 | -2.54       |
| Dmrt2         | 0.0009847 | -2.18       |
| Defb19        | 0.0005348 | -2.03       |
| Atp6v1c2      | 0.006206  | -1.98       |
| Tmem117       | 0.000256  | -1.98       |
| Rhbg          | 0.0007152 | -1.93       |
| D630045M09Rik | 0.004552  | -1.92       |
| Prss35        | 0.009532  | -1.88       |
| Mep1b         | 0.003531  | -1.8        |
| Mogat2        | 0.004439  | -1.78       |
| Mettl7b       | 0.008062  | -1.75       |
| Asb15         | 0.005251  | -1.73       |
| Cldn16        | 0.006019  | -1.72       |
| P2ry14        | 0.008086  | -1.7        |
| Bsnd          | 0.001405  | -1.68       |
| Fxyd2         | 0.0002234 | -1.67       |
| Dmgdh         | 0.005885  | -1.65       |
| Cela1         | 0.0004355 | -1.6        |
| Paqr9         | 0.005807  | -1.59       |
| Apom          | 0.001975  | -1.57       |
| Avpr1a        | 0.001721  | -1.56       |
| Dpep1         | 0.002856  | -1.55       |
| D630023F18Rik | 0.006828  | -1.55       |
| Slc7a8        | 0.002338  | -1.54       |
| Car12         | 0.0007251 | -1.54       |
| Susd2         | 0.0004474 | -1.54       |
| Fads3         | 0.004639  | -1.53       |
| Aif1l         | 0.007833  | -1.5        |
| Myom2         | 0.009734  | -1.48       |
| Fmo1          | 0.0008615 | -1.48       |
| Cxcl13        | 0.009329  | -1.48       |
| Dhcr24        | 0.001358  | -1.47       |
| Slc34a1       | 0.009876  | -1.44       |
| Tacr3         | 0.002509  | -1.43       |
| Slc34a3       | 0.004201  | -1.43       |
| Aadac         | 0.003055  | -1.4        |
| Pm20d1        | 0.0013    | -1.4        |
| Acss1         | 0.003673  | -1.39       |
| Fdft1         | 0.0007801 | -1.37       |
| Glyctk        | 0.003376  | -1.37       |
| Afm           | 0.001685  | -1.37       |
| Gcgr          | 0.005058  | -1.35       |
| Spp2          | 0.002707  | -1.35       |
| Cdo1          | 0.00233   | -1.34       |
| Insc          | 0.005082  | -1.34       |
| Sqle          | 0.008645  | -1.32       |
| Tmem52        | 0.008255  | -1.31       |
| Mybl2         | 0.002952  | -1.29       |
| Ptger3        | 0.008498  | -1.29       |
| Zfp213        | 0.008657  | -1.29       |
| Slc26a6       | 0.006758  | -1.28       |
| Nuak2         | 0.005697  | -1.28       |
| Ttc7          | 0.002607  | -1.27       |
| Pyroxd2       | 0.009562  | -1.26       |
| Glt28d2       | 0.009071  | 1.26        |
| Styk1         | 0.00255   | 1.27        |
| Krt8          | 0.005743  | 1.27        |
| Tbc1d8        | 0.009329  | 1.28        |
| Sgtb          | 0.006815  | 1.3         |
| Esrp1         | 0.009285  | 1.3         |
| Adap2         | 0.001433  | 1.31        |
| Plscr1        | 0.002988  | 1.31        |
| Etv5          | 0.007789  | 1.31        |
| Pfkfb3        | 0.008565  | 1.31        |
| Dtx4          | 0.004928  | 1.32        |
| Mgea5         | 0.001784  | 1.33        |
| Trpv6         | 0.002428  | 1.33        |
| Cpeb2         | 0.008049  | 1.33        |
| Nedd4l        | 0.00365   | 1.34        |
| Inpp1         | 0.007037  | 1.34        |
| Col8a1        | 0.009146  | 1.35        |
| Glb1l2        | 0.007226  | 1.36        |
| Slc18a2       | 0.003219  | 1.37        |
| Lgi3          | 0.005541  | 1.38        |
| Degs2         | 0.007848  | 1.38        |
| Ajap1         | 0.0007628 | 1.38        |
| Clec3b        | 0.002851  | 1.38        |
| Ephx1         | 0.006976  | 1.39        |
| Jun           | 0.0007967 | 1.4         |
| Eef2k         | 0.0006604 | 1.41        |
| Agt           | 0.001031  | 1.41        |
| Krt18         | 0.0004277 | 1.42        |
| Hhip          | 0.0017    | 1.42        |
| Ehf           | 0.004497  | 1.46        |
| Rdh12         | 0.003468  | 1.46        |
| Tmcc3         | 0.0070    | 1.49        |
| Ankrd29       | 0.002596  | 1.49        |
| Slc6a2        | 0.004283  | 1.55        |
| Stmn2         | 0.0003071 | 1.55        |
| Klf6          | 0.0084    | 1.63        |
| Thrsp         | 0.006588  | 1.65        |
| Slc41a2       | 0.006887  | 1.67        |
| Abca1         | 0.009626  | 1.69        |
| MIph          | 0.007599  | 1.71        |
| Cp            | 0.002202  | 1.74        |
| Cldn1         | 0.003714  | 1.88        |
| Defb42        | 0.0004979 | 1.93        |
| Shh           | 0.004842  | 2.1         |
| Gem           | 0.006437  | 2.15        |
| Cyp2j13       | 0.001225  | 2.45        |
| Tpsab1        | 0.003076  | 2.74        |
| Cyp27b1       | 0.0003643 | 7.94        |
| Sprr2f        | 0.001582  | 11.87       |
