# Supplementary material for: Transcription factor TFCP2L1 patterns cells in the mouse kidney collecting ducts
Source: eLife. 2017 Jun 3;6:e24265. doi: 10.7554/eLife.24265 (PMC5484618; doi:10.7554/eLife.24265)
Supplement: Supplementary file 1. — DOI: http://dx.doi.org/10.7554/eLife.24265.025 [file elife-24265-supp1.xlsx]

## Sheet: Supplementary File 1
Supplementary File 1. List of differentially expressed genes (p<0.05) between E2A-Cre;Tfcp2l1f/f knockouts and Tfcp2l1 control P1 mouse kidneys
symbol	logFC	t	P.Value
Oxgr1	-1.34208	-12.2958	1.42181e-05
Aqp6	-3.0111	-9.88916	5.15423e-05
Scn4b	-1.51719	-9.32084	7.28058e-05
Gm7325	-1.69265	-9.13808	8.16831e-05
Atp6v0d2	-1.89363	-7.811	0.000201138
Fxyd2	-0.741486	-7.66782	0.000223379
Atp6v1b1	-1.66777	-7.51811	0.000249706
Tmem117	-0.98226	-7.48498	0.000256005
Stmn2	0.636407	7.2467	0.00030706
Cyp27b1	2.98875	7.02853	0.000364269
Krt18	0.500906	6.82827	0.000427739
Cela1	-0.678336	-6.80616	0.000435492
Susd2	-0.619456	-6.77304	0.00044741
Defb42	0.950884	6.64316	0.000497884
Msmo1	-0.728436	-6.6359	0.000500891
Defb19	-1.02085	-6.55727	0.000534834
Hsd11b2	-1.37268	-6.43614	0.000592397
Eef2k	0.497733	6.3092	0.00066044
Apom	-0.603775	-6.24316	0.000699346
Rhbg	-0.94487	-6.21748	0.000715174
Car12	-0.622684	-6.20166	0.000725128
Vps8	-0.702072	-6.16854	0.000746484
Ajap1	0.466052	6.14402	0.000762756
Plekhd1	-0.396044	-6.13967	0.000765684
Fdft1	-0.457818	-6.1185	0.000780122
Jun	0.484442	6.09472	0.000796711
Fmo1	-0.563843	-6.00704	0.000861454
Dmrt2	-1.12319	-5.85913	0.000984715
Hepacam2	-1.91205	-5.84589	0.000996692
Agt	0.498136	5.80922	0.00103075
Rsph3a	0.63306	5.67782	0.00116411
Cyp2j13	1.29557	5.62383	0.00122451
Hhip	0.785867	5.58934	0.00126496
Pm20d1	-0.481002	-5.56047	0.00129998
Dhcr24	-0.553528	-5.51462	0.00135789
Bsnd	-0.748041	-5.47917	0.00140467
Adap2	0.385387	5.45803	0.00143345
Sprr2f	3.56948	5.3563	0.00158158
Krt8	0.353548	5.3393	0.00160798
Afm	-0.423981	-5.33889	0.00160863
Mgea5	0.413365	5.28454	0.0016965
Avpr1a	-0.643572	-5.27012	0.00172072
Cp	0.801973	5.02354	0.0022019
Colgalt2	-0.370052	-5.01664	0.00221739
Cdo1	-0.42236	-4.96817	0.00232982
Slc7a8	-0.622704	-4.96473	0.00233805
Trpv6	0.414838	4.92806	0.00242774
Tmem252	2.36197	4.91853	0.00245168
Tacr3	-0.519758	-4.89611	0.00250906
Styk1	0.34201	4.88059	0.00254969
Ankrd29	0.579919	4.8632	0.00259605
Ttc7	-0.339223	-4.85897	0.00260748
Spp2	-0.42837	-4.82301	0.00270694
Clec3b	0.46846	4.77335	0.0028514
Dpep1	-0.636545	-4.7718	0.00285604
Mybl2	-0.367405	-4.7404	0.00295202
Plscr1	0.390004	4.72886	0.00298823
Aadac	-0.482533	-4.7079	0.00305522
Tpsab1	1.45197	4.70138	0.00307643
Slc18a2	0.456758	4.65888	0.00321866
Cars2	-0.278852	-4.64404	0.00327004
Glyctk	-0.457143	-4.61432	0.00337575
Rdh12	0.545179	4.58937	0.00346751
Adora1	0.345202	4.58147	0.00349712
Gm17767	-0.490656	-4.58001	0.00350262
Mep1b	-0.85172	-4.57255	0.00353091
Thbs1	0.314964	4.5435	0.00364354
Nedd4l	0.417061	4.54193	0.00364973
Acss1	-0.472269	-4.53598	0.00367335
Cldn1	0.9135	4.52575	0.00371434
Akna	0.3191	4.42631	0.00414065
Slc34a3	-0.51528	-4.41307	0.00420143
Lgals2	-0.292008	-4.39877	0.00426822
Slc6a2	0.628024	4.39556	0.0042834
Saraf	0.430457	4.38722	0.00432303
Thrsp	1.94378	4.37056	0.0044035
Mogat2	-0.833998	-4.3634	0.00443858
Plet1	0.73542	4.35247	0.00449276
Ehf	0.541815	4.3516	0.00449714
D630045M09Rik	-0.942696	-4.34066	0.00455212
Fads3	-0.616147	-4.32378	0.00463851
Aif1l	-0.541753	-4.31492	0.00468461
Shh	1.07233	4.28544	0.00484164
Dtx4	0.400252	4.26965	0.00492815
Mturn	1.22889	4.26515	0.00495312
Slc18b1	-0.392106	-4.25734	0.00499681
Gcgr	-0.429164	-4.24662	0.0050575
Insc	-0.421239	-4.24237	0.00508178
Plcg2	-0.300161	-4.23793	0.00510729
Foxi1	-1.48049	-4.23736	0.00511055
Srebf2	-0.28286	-4.22573	0.00517811
Asb15	-0.791722	-4.21334	0.00525113
Lgi3	0.461074	4.166	0.00554098
Nuak2	-0.355332	-4.14168	0.00569679
Paqr9	-0.670263	-4.12496	0.00580677
Dmgdh	-0.719628	-4.11324	0.00588524
Cldn16	-0.783996	-4.09362	0.00601932
Cep41	-0.251538	-4.08475	0.00608103
Syn3	0.262834	4.06758	0.00620248
Atp6v1c2	-0.987086	-4.06712	0.00620577
Mab21l3	-0.320253	-4.05631	0.00628374
Klf6	0.717418	4.03751	0.00642179
Gem	1.1048	4.03553	0.00643654
Tob2	0.3133	3.99975	0.00670958
Slc26a6	-0.361013	-3.99352	0.00675836
Sgtb	0.374489	3.98632	0.00681535
D630023F18Rik	-0.628744	-3.98478	0.00682759
Slc41a2	0.736689	3.97738	0.00688679
Ephx1	0.473047	3.96633	0.00697623
Tmcc3	0.575453	3.9634	0.0070002
Inpp1	0.426195	3.95893	0.00703686
Agpat4	0.268045	3.95762	0.00704765
Pi16	0.289179	3.95447	0.00707371
Glb1l2	0.438476	3.93625	0.00722633
D17H6S56E-5	0.729299	3.93445	0.00724164
Mlph	0.777118	3.89348	0.0075993
Etv5	0.3925	3.87256	0.00778948
Degs2	0.461396	3.86622	0.00784815
AI844685	-0.494754	-3.848	0.00801955
Cpeb2	0.416685	3.84496	0.00804853
Mettl7b	-0.808806	-3.84351	0.00806241
P2ry14	-0.768051	-3.84106	0.00808585
Plagl1	0.25727	3.83011	0.00819185
Tmem52	-0.389596	-3.82364	0.00825514
Ptger3	-0.362788	-3.7993	0.00849824
Pfkfb3	0.395022	3.79276	0.00856489
Sqle	-0.40004	-3.78497	0.00864506
Zfp213	-0.36212	-3.78382	0.00865699
Glt28d2	0.337732	3.74486	0.00907128
Col8a1	0.43447	3.73808	0.00914557
Scn3b	0.268354	3.73095	0.00922441
2016-09-08	0.513074	3.73001	0.00923486
Mycl	0.737306	3.72786	0.00925882
Esrp1	0.380607	3.72552	0.00928495
Rogdi	-0.278099	-3.72524	0.00928814
Tbc1d8	0.357719	3.72159	0.00932912
Cxcl13	-0.56313	-3.72157	0.00932934
Prss35	-0.910422	-3.7038	0.00953168
Pyroxd2	-0.338308	-3.70117	0.00956203
Abca1	0.755365	3.69566	0.00962596
Myom2	-0.569289	-3.68644	0.00973405
Slc34a1	-0.526958	-3.67454	0.00987554
Cd68	0.662063	3.66487	0.00999222
Cacna1a	-0.68	-3.6615	0.0100332
Lmcd1	-0.262004	-3.65908	0.0100628
Tc2n	0.349712	3.65674	0.0100914
Tgif1	0.256563	3.65128	0.0101587
Fdps	-0.388802	-3.64992	0.0101755
Fosl2	0.572056	3.64425	0.010246
Pcdh9	0.888885	3.64232	0.0102701
Lamtor5	-0.266093	-3.6404	0.0102943
Tinag	-0.486152	-3.6389	0.010313
Idi1	-0.582773	-3.63882	0.010314
Rnasek	-0.251195	-3.63288	0.0103891
Ildr1	0.629595	3.62862	0.0104432
Hao2	0.44168	3.60004	0.0108146
Uncx	0.288649	3.5926	0.0109137
Mxi1	0.324473	3.59186	0.0109235
Defb2	0.845166	3.58748	0.0109824
Bspry	0.311677	3.57571	0.0111423
Acly	0.235947	3.57424	0.0111624
4930435N07Rik	-0.3271	-3.57256	0.0111854
Apela	0.498013	3.57223	0.01119
4933407E14Rik	0.254465	3.56844	0.0112423
Irf2bp2	0.27944	3.56449	0.011297
Cxcl1	0.809335	3.55901	0.0113734
Upk3b	0.54747	3.54615	0.0115551
Xist	-4.62419	-3.54181	0.0116172
Proz	-0.492885	-3.53791	0.0116732
Slc5a2	-0.802817	-3.52411	0.011874
Mmp24	-0.2699	-3.51972	0.0119386
Krt19	0.781073	3.51824	0.0119604
Heca	0.466817	3.50113	0.0122167
Fabp3	-0.397236	-3.49276	0.0123442
Deptor	0.550165	3.49107	0.0123702
Rgs2	0.834244	3.48915	0.0123996
Myc	0.421263	3.48004	0.0125408
Slc39a5	-0.267655	-3.47968	0.0125464
Agxt2	-0.684991	-3.47956	0.0125484
Sphk1	0.709116	3.46809	0.0127287
Rasgef1b	0.852176	3.45399	0.0129543
Cldn3	0.891856	3.45377	0.0129579
Sypl2	-0.402733	-3.45083	0.0130055
Pth1r	-0.655692	-3.44965	0.0130247
Zxdb	0.253072	3.44244	0.0131423
Ace2	-0.227708	-3.44072	0.0131707
Dhh	-0.466727	-3.44017	0.0131798
Slc4a5	0.644429	3.43312	0.0132963
Dclk1	0.261621	3.42972	0.0133531
Ptpn6	0.296957	3.42841	0.0133749
Opa3	-0.507642	-3.42692	0.0133999
Ccndbp1	0.296613	3.4251	0.0134304
Vat1	0.325276	3.4232	0.0134624
Cfap52	0.520235	3.4208	0.0135029
Rerg	1.11698	3.41592	0.0135858
Fam117b	0.256254	3.41086	0.0136722
Tes	0.269666	3.40972	0.0136918
Mettl23	0.847273	3.40594	0.0137569
Mxra7	0.406331	3.40525	0.0137688
Dtna	0.227261	3.39308	0.0139807
Ptgir	-0.580467	-3.38965	0.0140412
Rpap2	0.280221	3.38707	0.0140867
Ak7	0.204079	3.38584	0.0141085
Scara5	0.79961	3.38521	0.0141197
Ces1d	1.42435	3.37513	0.0143
Ecm1	0.479864	3.37478	0.0143063
Ddit4l	0.230732	3.37288	0.0143405
Pros1	0.443566	3.37028	0.0143876
Nipal2	0.337859	3.36741	0.0144397
Ufsp1	0.354098	3.36561	0.0144725
Slc22a8	-0.360452	-3.36552	0.0144742
AI854703	-0.320924	-3.35542	0.0146598
Tmem65	0.281706	3.35386	0.0146886
4930452B06Rik	0.240989	3.35348	0.0146957
4933407O12Rik	0.214615	3.35243	0.0147152
Sult1a1	1.27973	3.35195	0.0147242
Hipk2	-0.2917	-3.34894	0.0147802
Nepn	-0.990237	-3.3489	0.0147809
Map3k5	0.347396	3.3462	0.0148314
Cbr3	1.26874	3.3402	0.0149443
Wfdc1	0.241894	3.33064	0.0151262
Sh3gl2	0.380737	3.33059	0.0151271
Prelid2	0.546788	3.32552	0.0152245
Ldlr	-0.379813	-3.32003	0.0153308
Amigo2	0.503321	3.31934	0.0153443
Lrrc31	0.633672	3.31327	0.0154628
6430573F11Rik	0.393481	3.31235	0.0154808
D630029K05Rik	-0.380174	-3.31145	0.0154985
Nhej1	0.886204	3.31142	0.0154991
Clu	0.217657	3.31039	0.0155193
Nfkbia	0.641758	3.30657	0.0155948
Wdr26	0.267114	3.30605	0.0156052
Sult2b1	-0.233561	-3.3032	0.0156616
C3	1.38792	3.30307	0.0156643
Pak1	0.435288	3.30072	0.015711
F3	0.732631	3.2977	0.0157714
Prpf38a	-0.258301	-3.29492	0.0158273
Rras	0.356366	3.29429	0.0158399
Krt20	1.26468	3.29388	0.0158483
Ppp1r3c	0.725585	3.2922	0.0158821
Sh3bgrl3	0.448343	3.29071	0.0159122
Jmjd1c	0.270509	3.2906	0.0159144
Fshr	-0.278991	-3.28692	0.0159892
Rad51c	-0.343839	-3.28598	0.0160083
D430041D05Rik	0.307051	3.2848	0.0160323
Stmn3	0.789915	3.28288	0.0160716
Olfm4	0.776156	3.28107	0.0161088
Gpr183	-0.49301	-3.27965	0.0161379
Ntf3	-0.472488	-3.27345	0.0162658
Gria1	-0.242721	-3.26897	0.016359
Cyp2d26	0.515825	3.26853	0.0163681
Crabp1	-1.52561	-3.26532	0.0164353
Kl	-0.76412	-3.26307	0.0164826
Sh3rf1	0.557076	3.25229	0.016711
Il6st	0.430691	3.24395	0.01689
Ptgfr	0.869939	3.24389	0.0168914
St6galnac2	0.428474	3.24301	0.0169104
Tysnd1	-0.198309	-3.24156	0.0169417
Clcnka	0.393224	3.23886	0.0170003
Ihh	0.340124	3.23857	0.0170066
Stat5a	0.253898	3.23845	0.0170092
Insig1	-0.374223	-3.23731	0.0170341
Vpreb1	0.368933	3.23173	0.0171563
Slc16a6	-0.462795	-3.23082	0.0171763
Aktip	0.203275	3.2269	0.0172627
Slc4a9	-0.532245	-3.22026	0.0174103
BC089597	-0.267947	-3.21586	0.0175088
Slc5a9	-0.333401	-3.21516	0.0175244
Stap2	0.233818	3.21492	0.0175299
Gabrb3	0.311646	3.21474	0.017534
Zgrf1	-0.582476	-3.21438	0.017542
Limk2	0.402401	3.20804	0.0176853
Wnk1	-0.383591	-3.20747	0.0176983
Per1	1.31174	3.20538	0.0177459
Soat1	0.470112	3.20323	0.0177949
9530036O11Rik	0.326124	3.20053	0.0178568
Nbr1	0.324744	3.19909	0.01789
Chodl	0.278313	3.19524	0.0179785
Acsl1	0.258977	3.19398	0.0180078
Angpt4	0.221748	3.19187	0.0180567
Qrfpr	0.18948	3.18958	0.01811
Zfp69	-0.466934	-3.18776	0.0181525
Egf	-0.325222	-3.18191	0.0182897
Zbtb45	-0.255185	-3.18156	0.018298
Wdr45	0.331625	3.17679	0.0184106
Ankra2	1.06047	3.17669	0.018413
Pou3f3	0.246827	3.16598	0.018669
Rhob	0.289761	3.16475	0.0186988
Rnf125	0.234892	3.16234	0.0187571
Cldn8	0.284711	3.16037	0.0188049
Pcx	-0.237762	-3.15948	0.0188265
Adcy4	-0.26765	-3.15837	0.0188535
4933401H06Rik	-0.225083	-3.15429	0.018953
A930017K11Rik	-0.594697	-3.15198	0.0190097
Mgll	0.288872	3.14918	0.0190786
Slamf7	-0.202389	-3.14416	0.0192027
Adamts4	0.342742	3.13612	0.0194037
Neu3	0.200179	3.13353	0.0194688
Atp10a	0.233905	3.12564	0.0196689
Akr1b8	0.487716	3.12549	0.0196727
Nrk	-0.21447	-3.12361	0.0197207
Zbtb4	0.327082	3.11909	0.0198365
Ramp1	0.475426	3.11696	0.0198914
Ache	0.221268	3.11498	0.0199425
Swap70	0.262115	3.11268	0.0200021
Prelp	-0.204584	-3.11091	0.0200482
Ttll10	0.192449	3.11034	0.020063
Pla2g1b	0.190683	3.10976	0.0200781
Lppr1	-0.665828	-3.10865	0.020107
Rnase4	0.579437	3.10608	0.0201744
Ppa1	-0.32173	-3.1033	0.0202472
Fgfr2	0.271748	3.10136	0.0202984
Dhrs1	-0.293401	-3.09789	0.0203902
Calcoco1	0.242487	3.09519	0.0204619
Mvd	-0.265821	-3.09267	0.0205292
Ppfia4	-0.211555	-3.09223	0.0205408
Rab25	0.310335	3.0895	0.0206139
Clec4n	0.487969	3.08824	0.0206476
Serping1	0.410542	3.08431	0.0207535
Zfp467	-0.296854	-3.06949	0.0211582
4933435C09Rik	-0.214685	-3.0555	0.021548
Lpar2	-0.446541	-3.04994	0.0217051
Ndrg4	0.38052	3.04839	0.021749
Zcchc18	0.373972	3.04826	0.0217529
Dusp1	0.726987	3.04733	0.0217793
Trp63	0.466534	3.04527	0.021838
Dusp8	0.298896	3.04485	0.02185
Il24	-0.197454	-3.04206	0.02193
Sgk1	0.533569	3.04059	0.0219722
Ptch1	0.242437	3.03825	0.0220394
Mxd4	0.26959	3.03358	0.0221744
Gnpnat1	0.450166	3.03352	0.0221764
Scrt2	-0.236755	-3.03056	0.0222625
Cmah	-0.24204	-3.02335	0.0224736
Gpd1	-0.366179	-3.01875	0.0226096
Atp8a2	0.264785	3.01031	0.0228613
Dsg2	0.324252	3.00991	0.0228731
Capn9	-0.279972	-3.00885	0.0229052
Camk2d	0.222021	3.00577	0.022998
Vav3	0.350238	3.00418	0.0230459
Shd	-0.323209	-3.00311	0.0230783
1500012F01Rik	0.359411	2.99452	0.0233401
Arg2	1.40901	2.9909	0.0234516
Pex5	0.209517	2.98807	0.0235391
Plscr4	0.311665	2.98531	0.0236246
Endov	-0.223877	-2.98249	0.0237123
Coro2a	0.852181	2.98237	0.0237162
Plekha2	0.196708	2.98219	0.023722
Uchl1	0.420484	2.9819	0.0237309
1110014L15Rik	0.310867	2.9807	0.0237685
Vtcn1	0.288322	2.97953	0.0238051
Satb1	0.24223	2.97434	0.0239684
Camta1	0.276186	2.97421	0.0239725
Slc5a3	0.766129	2.9713	0.0240646
Mecom	0.194676	2.97035	0.0240948
H2-K1	0.251844	2.96962	0.0241178
Serinc1	0.247298	2.96853	0.0241526
Vwce	-0.400189	-2.96742	0.0241877
Cdkn1a	0.476212	2.96689	0.0242048
Kat2b	0.234741	2.96541	0.024252
Nbl1	0.484471	2.96413	0.0242931
Car2	-0.375701	-2.9637	0.0243067
Ric8	-0.245123	-2.96206	0.0243594
Osbpl6	-0.461064	-2.96152	0.0243767
Sardh	-0.279998	-2.95464	0.0245991
Tex29	-0.244495	-2.95162	0.0246972
Arhgap12	0.26393	2.94822	0.0248085
Lgr4	0.290393	2.948	0.0248157
Vmn1r58	-0.223433	-2.94611	0.0248776
Adcyap1r1	-0.383886	-2.94473	0.0249231
Serinc3	0.500705	2.9404	0.0250662
Crispld2	0.469111	2.93953	0.0250949
Btg2	0.576385	2.93641	0.0251988
Muc3	0.462435	2.93509	0.0252426
Sqstm1	0.401574	2.93401	0.0252789
Mapk10	0.48455	2.93335	0.0253009
Pogz	-0.227175	-2.93241	0.0253324
Igfals	-0.486808	-2.92722	0.0255069
Hif3a	0.776131	2.92702	0.0255135
Col26a1	-0.262857	-2.92505	0.0255803
Gramd1b	0.479631	2.92429	0.0256059
Gale	-0.257196	-2.92377	0.0256238
Fhl1	0.313908	2.91893	0.0257884
Mef2d	0.244456	2.91676	0.0258628
Bbs10	-0.274561	-2.91538	0.02591
Cbr1	0.46429	2.91444	0.0259423
Krtcap3	0.300413	2.91401	0.0259571
Gm5485	0.231618	2.91362	0.0259704
Fam65b	0.414403	2.91339	0.0259785
Map3k3	0.226291	2.90845	0.0261491
Il17rd	-0.221281	-2.90377	0.0263121
Gm10010	-0.183159	-2.89877	0.0264869
Vcpkmt	-0.329398	-2.89877	0.0264871
Ace	-0.410676	-2.89373	0.026665
Nfe2l3	0.597436	2.89216	0.0267206
Zfp618	-0.241379	-2.89003	0.0267962
Klhl25	-0.228267	-2.88939	0.0268192
Mtus1	0.537984	2.88743	0.0268891
Cldn4	0.337006	2.88635	0.0269276
Adra2a	0.506002	2.88347	0.027031
Igf1r	0.340157	2.88289	0.0270519
Xkr5	-0.349171	-2.88254	0.0270643
Ccdc149	0.361639	2.88253	0.0270648
Mtm1	-0.473277	-2.88126	0.0271104
Egfl8	-0.218157	-2.8792	0.027185
Nxnl2	-0.352279	-2.8774	0.0272499
Ubxn11	-0.339492	-2.87615	0.0272955
Dnajc11	-0.202576	-2.87397	0.0273746
Rtn1	0.492967	2.87364	0.0273868
Il1rn	0.280383	2.87312	0.0274057
2810403A07Rik	-0.240014	-2.86985	0.0275251
Gsdmc2	1.28672	2.86565	0.0276795
Ttc39c	-0.222117	-2.85963	0.0279025
Tox3	0.294309	2.85704	0.0279989
Dpyd	0.620061	2.85638	0.0280236
Mllt3	0.279992	2.85608	0.0280347
Car4	-0.295286	-2.85496	0.0280766
Odc1	-0.351084	-2.85484	0.0280809
Ttc23	0.246168	2.85453	0.0280925
Npl	-0.302937	-2.85446	0.0280954
Ctu1	0.174068	2.8513	0.0282139
Ccdc64	0.517264	2.84954	0.0282804
Zfp354a	0.266009	2.84681	0.0283835
Rbpms	-0.404295	-2.83823	0.0287102
Gsn	0.384878	2.8381	0.0287151
Anxa8	0.253928	2.83744	0.0287405
Rimkla	-0.211556	-2.83645	0.0287785
Klf2	0.21407	2.83452	0.0288529
Socs7	0.19676	2.83379	0.028881
Abcc3	0.458669	2.83312	0.0289071
Myo5b	0.180137	2.82964	0.0290416
Acox2	-0.488588	-2.82862	0.0290813
Cyp51	-0.504602	-2.82377	0.0292706
Zfp248	0.235885	2.82271	0.0293119
Irx5	0.303836	2.82039	0.0294029
1600012H06Rik	0.298088	2.81845	0.0294793
BC005685	-0.17555	-2.81759	0.0295134
Gif	-0.228382	-2.81734	0.0295232
Nlrp9b	-0.268335	-2.81693	0.0295395
Tspyl1	0.226985	2.81662	0.0295518
Ube2m	-0.472574	-2.81622	0.0295674
Nt5dc3	0.373783	2.81573	0.0295869
Defb1	-0.592448	-2.81511	0.0296114
D630004K10Rik	-0.494804	-2.81427	0.0296447
Golph3l	0.192436	2.81342	0.0296784
Igfbp6	0.730073	2.81042	0.0297979
Pygl	0.315113	2.80987	0.0298197
Cd47	0.33714	2.80498	0.0300159
Pold1	-0.411727	-2.80234	0.030122
Adgrd1	0.225913	2.80234	0.0301221
Fam83h	0.360066	2.80215	0.0301298
Slc35f5	0.257586	2.80153	0.0301547
Popdc2	-0.221771	-2.8	0.0302168
Kifc3	-0.216283	-2.79986	0.0302224
Spint2	0.230743	2.79603	0.0303778
Zfp651	0.188296	2.79177	0.0305518
Gorasp1	-0.185435	-2.79059	0.0306002
Ccdc169	-0.271407	-2.78962	0.03064
Crot	0.265658	2.78635	0.030775
Bbs7	-0.381591	-2.78588	0.0307941
Wls	-0.339406	-2.78586	0.0307951
Rusc1	0.295521	2.78317	0.0309063
Folh1	1.15796	2.78151	0.0309754
Tfdp2	-0.215326	-2.77933	0.0310664
Usp53	0.41	2.77932	0.0310668
Sox17	-0.295888	-2.77913	0.0310745
Gadd45b	0.522272	2.77451	0.031268
Cdc42ep4	0.281556	2.7732	0.031323
F13b	-0.852422	-2.77047	0.0314382
Mcm5	-0.56089	-2.76976	0.031468
Gss	-0.259581	-2.76453	0.03169
Ttc39b	0.295479	2.7624	0.0317812
Rgcc	0.465973	2.76075	0.0318518
Ttc7b	0.333749	2.75716	0.0320056
Sstr4	-0.300942	-2.75594	0.0320586
Stk32b	0.193856	2.75455	0.0321182
Mgst1	0.332552	2.7543	0.032129
Adamts2	0.258439	2.75339	0.0321686
Crebrf	0.581807	2.75288	0.0321906
H2-D1	0.295606	2.75255	0.032205
Batf	0.251999	2.75149	0.0322511
Slc9a5	-0.338562	-2.75083	0.0322796
Csf1r	0.274808	2.75077	0.0322821
Rbm11	0.208396	2.74841	0.032385
Stoml1	0.167277	2.74785	0.0324092
Kcna5	0.847924	2.74678	0.0324562
Atp5j2	-0.358792	-2.74554	0.0325103
4922502B01Rik	-0.177199	-2.74367	0.0325924
A530020G20Rik	-0.168298	-2.74133	0.0326951
Anapc11	-0.202494	-2.73932	0.0327841
Peg3	0.652957	2.73783	0.03285
Ispd	-0.500028	-2.73583	0.0329386
Cd2ap	0.211201	2.73425	0.0330085
Ube2f	-0.200642	-2.73282	0.0330725
Tfeb	-0.247548	-2.73061	0.0331712
Rassf2	0.337697	2.73058	0.0331725
Slc40a1	0.408446	2.73054	0.0331743
Ndrg1	0.742302	2.73023	0.033188
Hbp1	0.372904	2.72886	0.0332495
Hic1	-0.391832	-2.72823	0.0332779
Peli2	0.538258	2.72734	0.0333176
Ywhaq	0.222572	2.72674	0.0333447
Apmap	-0.204141	-2.72575	0.0333891
Adgrg2	0.374971	2.72477	0.0334335
Pqlc1	0.173929	2.72321	0.033504
Hmgcr	-0.267493	-2.72308	0.0335098
Acpp	0.635501	2.72286	0.0335197
C130071C03Rik	0.242133	2.72181	0.0335674
Ctgf	0.970103	2.71884	0.0337022
Six4	-0.257413	-2.71801	0.0337399
Cyth3	0.322372	2.71682	0.0337942
Ppap2b	0.210709	2.71469	0.0338916
Klf9	0.877345	2.71428	0.0339102
Slitrk2	-0.308681	-2.71116	0.0340535
Frat2	0.373279	2.70976	0.0341179
Mgp	0.351765	2.70945	0.0341322
1810011O10Rik	0.349754	2.70511	0.0343329
Jak2	0.351659	2.70467	0.0343533
Cd14	0.838328	2.69962	0.0345887
Cd44	0.3298	2.69915	0.0346109
Smim1	0.42686	2.69881	0.0346266
Fzd4	0.228342	2.69638	0.0347405
Lpl	0.369718	2.69603	0.034757
Klhdc8b	-0.338712	-2.69163	0.0349648
Cyp27a1	0.420658	2.69087	0.0350007
Spata13	0.290427	2.68841	0.0351171
Bcas1	-0.161119	-2.68666	0.0352008
Rttn	-0.287344	-2.68639	0.0352137
Mpi	-0.256006	-2.6831	0.0353708
Pck2	0.259603	2.68276	0.0353873
Rnf144b	0.190123	2.68138	0.0354531
Pik3ca	0.298194	2.6802	0.0355101
Grwd1	-0.167273	-2.68001	0.035519
Cpe	0.278518	2.67882	0.0355763
Dnase1l2	1.47502	2.67859	0.0355874
Tbc1d9	0.277486	2.67839	0.0355969
Adcy7	0.606996	2.6783	0.0356014
Cpz	-0.234628	-2.67807	0.0356125
Ttll7	0.453995	2.6774	0.0356449
Pof1b	0.302311	2.67691	0.0356684
Fnip1	0.303747	2.67648	0.0356896
Cdkn2b	0.37807	2.67561	0.0357315
Mocos	0.238434	2.67459	0.0357811
Ucp3	-0.222058	-2.67406	0.0358066
Cldn7	0.314312	2.67348	0.0358349
Fbxo32	0.782477	2.67296	0.0358598
Ptprr	0.579495	2.67182	0.0359152
Cntd1	0.228838	2.67108	0.0359515
Slc16a9	-0.414443	-2.67079	0.0359658
2410004P03Rik	-0.218395	-2.67022	0.0359935
Camk2b	0.321722	2.66984	0.0360122
Hoxb6	0.236299	2.66893	0.0360564
Nampt	0.175111	2.6689	0.036058
Arhgap26	0.300765	2.66701	0.0361506
Ier2	0.214162	2.66477	0.0362606
Socs2	0.200749	2.66235	0.0363795
Tmbim4	-0.198895	-2.66138	0.0364273
Insr	0.643817	2.66071	0.0364604
Atl2	0.265367	2.66042	0.0364749
Skp2	-0.463318	-2.66028	0.0364818
Clcn5	-0.237577	-2.65836	0.036577
Gfod1	-0.316394	-2.65807	0.0365917
Aaed1	0.210475	2.65772	0.0366091
Slc16a12	-0.251953	-2.65451	0.0367686
Cxcl16	0.722	2.65423	0.0367826
Crbn	0.225023	2.65153	0.0369177
Fam19a2	-0.238144	-2.65055	0.0369668
Ddx3y	3.12921	2.64907	0.0370415
Agpat5	-0.203636	-2.64892	0.0370489
Gm28729	-0.230593	-2.64859	0.0370655
Cyp2d12	0.200191	2.64836	0.0370771
Rassf5	0.446938	2.64796	0.0370972
Eno4	-0.174107	-2.64668	0.0371616
Ube2t	-0.249163	-2.64564	0.0372145
Rtn4ip1	-0.213893	-2.64518	0.0372378
Kcnq2	-0.251334	-2.64233	0.0373821
Nup93	-0.266917	-2.6422	0.0373886
Ccdc12	-0.3048	-2.64177	0.0374106
Lrrc17	0.318242	2.64046	0.0374774
D2Ertd48e	-0.202621	-2.6403	0.0374855
Eef2	0.191483	2.6399	0.0375056
Chrna4	-0.261724	-2.63987	0.0375072
Ctsb	0.320858	2.63914	0.0375444
Pcgf6	0.184958	2.63868	0.0375681
Cmtr1	-0.268103	-2.63841	0.0375819
Ptms	0.344592	2.63798	0.0376035
AA415398	0.353896	2.63774	0.0376159
Tex15	-0.325807	-2.6373	0.0376387
Pantr1	0.320161	2.63697	0.0376555
Arhgap28	-0.19954	-2.63663	0.0376726
Ipcef1	0.257881	2.63641	0.037684
Bcl7c	-0.196752	-2.6354	0.0377356
Tsc22d3	0.90608	2.63361	0.0378279
Clcnkb	-1.10965	-2.62923	0.0380537
Cubn	-0.364668	-2.62921	0.0380548
B4galnt1	0.391673	2.62771	0.0381323
Cyp2d22	0.882195	2.62767	0.0381347
Sp4	0.248304	2.62726	0.0381558
Sh3tc1	-0.32557	-2.62571	0.0382366
Nfkbiz	0.527574	2.62546	0.0382493
Csf2	-0.230462	-2.62311	0.0383722
Fam105a	0.372471	2.62223	0.0384178
Vasn	0.248865	2.62217	0.0384212
Stat5b	0.271647	2.61981	0.038545
Phactr1	-0.186392	-2.61892	0.0385914
Lyve1	1.7468	2.6187	0.0386031
Slc16a5	-0.308963	-2.61726	0.038679
Hmgcs1	-0.195405	-2.61508	0.0387937
Pcp4l1	-0.354173	-2.61433	0.0388336
Tmem140	0.833845	2.61333	0.0388864
Amot	-0.238287	-2.61228	0.0389418
Elavl2	-0.222202	-2.61184	0.0389653
Faah	0.231407	2.61162	0.0389768
Sdr42e1	0.27868	2.61141	0.0389882
Eif2s3y	0.184922	2.6092	0.0391058
Map3k8	0.560424	2.60706	0.03922
Tmeff2	0.335658	2.60677	0.0392352
Ino80dos	0.266692	2.60563	0.0392964
Sostdc1	-0.225481	-2.60528	0.039315
Usp49	-0.227613	-2.60375	0.0393974
Man1c1	0.205275	2.6036	0.0394052
Mynn	0.199088	2.60358	0.0394066
Napb	0.327686	2.60282	0.0394471
Cdhr5	-0.214943	-2.60182	0.0395009
Syt1	0.287272	2.59636	0.0397965
BC026600	0.899765	2.59479	0.0398817
Coprs	-0.252753	-2.59464	0.0398894
Pxdc1	0.214554	2.59023	0.0401303
Dapk1	0.239058	2.59	0.0401428
3930401B19Rik	1.1582	2.5898	0.0401542
2900001G08Rik	-0.226279	-2.58958	0.040166
Timp2	0.166957	2.5895	0.0401702
Klhl10	0.166219	2.58843	0.0402292
Mtfp1	-0.259877	-2.58798	0.040254
P2rx3	-0.170538	-2.58756	0.0402769
Laptm5	-0.173121	-2.58642	0.0403394
Brd1	0.218161	2.58617	0.0403535
Entpd1	0.520136	2.58422	0.0404607
Steap2	0.195278	2.58313	0.0405214
Atp6v1a	-0.235561	-2.58308	0.040524
Tnni3	0.208062	2.5825	0.040556
Trim47	0.46571	2.58211	0.0405777
Eppk1	0.4541	2.58131	0.0406219
Rbbp7	0.2353	2.58027	0.0406799
Relt	-0.172801	-2.58016	0.0406859
Susd6	0.319062	2.57922	0.040738
Hmx2	-0.29224	-2.57717	0.0408523
Il18	0.355608	2.57682	0.0408718
Cbln4	1.32395	2.57674	0.0408764
Trim7	0.203426	2.57606	0.0409146
Prkca	-0.212748	-2.57506	0.0409703
A4galt	0.354564	2.57506	0.0409705
Uhrf2	0.161747	2.57433	0.0410109
Cckar	-1.43957	-2.57335	0.0410663
Lpo	2.44721	2.57314	0.0410781
Lgals9	-0.22974	-2.57164	0.0411621
Steap4	0.598809	2.57119	0.0411876
Kcnip4	0.276187	2.56872	0.041327
Bsdc1	0.288987	2.56707	0.0414199
Myzap	0.46545	2.56574	0.0414955
Gas5	0.213611	2.56394	0.0415978
Kcnj10	-0.165444	-2.56385	0.0416027
Cgn	0.260469	2.56001	0.0418221
6330416G13Rik	-0.253623	-2.55947	0.0418528
Rell1	0.189851	2.55936	0.0418589
Prkd3	0.221891	2.55922	0.0418668
Lrpap1	-0.165958	-2.5592	0.0418683
Dennd5b	-0.247717	-2.55817	0.0419273
Rab11b	0.226256	2.55788	0.0419436
Chmp3	0.165016	2.55694	0.041998
Plcxd3	0.552524	2.55587	0.0420591
Gdap1	0.172234	2.5553	0.0420924
Pdzrn4	-0.172898	-2.55409	0.0421618
Ptcd1	0.166836	2.55387	0.0421747
Cct4	-0.188771	-2.55248	0.0422548
Col27a1	-0.19943	-2.55242	0.0422586
2810474O19Rik	0.237152	2.54817	0.0425051
Gp2	-0.182347	-2.54627	0.0426156
Mkrn1	0.237313	2.54614	0.0426229
Tns1	0.381606	2.5458	0.0426429
Bysl	-0.370071	-2.54478	0.0427026
Epb41	0.217116	2.54422	0.0427351
Cd163	1.42405	2.54392	0.0427528
Yipf2	0.16093	2.54165	0.0428858
F13a1	0.912482	2.54113	0.0429163
Zkscan8	0.15939	2.5409	0.0429302
Acsl3	-0.453841	-2.54059	0.0429485
Ets2	0.341337	2.53972	0.0429995
Crebbp	-0.425625	-2.53829	0.043084
Ly6e	0.343596	2.53718	0.0431493
B930041F14Rik	-0.27759	-2.53712	0.0431532
Ube2u	-0.690178	-2.53635	0.0431983
Grpel2	0.214601	2.53564	0.0432404
Dpf3	-0.253049	-2.53536	0.0432572
Cast	0.211993	2.53346	0.0433699
Adamts20	-0.269934	-2.53273	0.0434135
Elmo1	-0.190947	-2.53267	0.043417
Kat8	0.200599	2.53074	0.0435317
Timp3	0.260149	2.5294	0.0436118
Snhg6	0.327082	2.52916	0.0436265
Timp4	0.491598	2.52863	0.0436582
Nfasc	0.167181	2.52862	0.0436583
Slc2a9	-0.338345	-2.52832	0.0436763
Ankrd11	-0.196566	-2.52778	0.0437087
Prr22	-0.268867	-2.52747	0.0437275
Phykpl	0.266501	2.52643	0.0437897
Wbp1l	0.502639	2.52471	0.0438935
Foxm1	-0.404761	-2.52436	0.0439144
Map1lc3a	0.191725	2.5243	0.043918
Coro2b	-0.323395	-2.52348	0.0439671
St14	0.215856	2.52299	0.0439972
Smpd3	-0.254666	-2.52261	0.0440197
Neurod1	0.247716	2.52255	0.0440232
Pinx1	-0.238352	-2.52251	0.044026
Ncam1	-0.212344	-2.52208	0.044052
Rab20	0.406623	2.52094	0.0441206
Crisp1	2.13105	2.52045	0.0441507
Ncoa4	0.795694	2.51964	0.0441998
Akr1c18	0.351407	2.5182	0.044287
Syt14	0.513608	2.51798	0.0443006
Ccne1	-0.399314	-2.51608	0.0444159
Btnl9	0.613074	2.516	0.0444209
Zfp111	-0.451455	-2.51597	0.0444228
Myo1b	0.194258	2.51506	0.0444781
Trib3	0.300857	2.51408	0.0445379
Kcnk1	0.288565	2.51334	0.0445834
Cnnm4	-0.231642	-2.51175	0.0446808
Ypel2	0.365902	2.5115	0.0446959
Junb	0.284157	2.51073	0.0447435
Rab3d	0.194098	2.51067	0.0447468
Cnppd1	0.317452	2.51058	0.0447526
Sult1d1	0.553569	2.50855	0.0448773
Ubl7	0.317212	2.50739	0.0449488
Fahd2a	0.231751	2.50668	0.0449925
Pdzd11	-0.247591	-2.50628	0.0450177
2010300C02Rik	0.308318	2.5061	0.0450287
Ctsf	0.349695	2.50487	0.0451048
Mospd3	0.267413	2.50485	0.0451058
Tkfc	-0.405965	-2.50403	0.0451568
Ednrb	0.292776	2.50391	0.0451644
Setmar	0.202592	2.50364	0.0451809
Etnk1	0.262767	2.50327	0.0452037
4930563D23Rik	-0.278927	-2.50255	0.0452485
Slc22a2	-0.363668	-2.5025	0.0452517
2900024J01Rik	0.216138	2.50128	0.0453274
Slc44a3	0.299572	2.50101	0.0453442
Emb	0.351324	2.50076	0.0453598
Ptbp2	-0.186242	-2.50006	0.0454036
Ryr1	0.183129	2.49952	0.0454371
Bst1	0.416734	2.49939	0.0454454
Mycn	0.304975	2.49798	0.0455336
Serpinh1	-0.515019	-2.49752	0.0455625
Trpm7	0.443753	2.49668	0.045615
Airn	-0.287233	-2.49636	0.0456349
Adgrg1	-0.256985	-2.49534	0.045699
Cd300ld	0.174287	2.49468	0.0457403
Fzd6	0.317181	2.49432	0.0457633
Ppargc1a	0.221841	2.49398	0.0457845
Liph	0.472717	2.49341	0.0458204
Slc13a4	-0.265812	-2.49291	0.0458517
Slc4a8	0.189068	2.49066	0.0459936
Lhfpl3	0.217822	2.49034	0.0460142
Ppl	0.434335	2.48965	0.0460581
Ddc	0.755443	2.48937	0.0460758
Arid4a	0.289315	2.48803	0.0461605
6330582A15Rik	-0.183467	-2.48685	0.0462356
Il12a	-0.203014	-2.48492	0.0463584
Mid1ip1	0.175125	2.48406	0.0464133
4933412O06Rik	-0.196405	-2.4816	0.0465708
Them4	-0.246864	-2.47878	0.0467512
1300017J02Rik	0.165236	2.47816	0.0467916
Map3k6	0.847096	2.47766	0.0468237
Map1lc3b	0.270247	2.47742	0.046839
Cbfa2t3	0.186703	2.47481	0.0470075
Klf5	0.593082	2.47282	0.0471366
4930431F12Rik	-0.159377	-2.47215	0.0471803
Socs6	0.195623	2.47062	0.0472792
Dock3	-0.156709	-2.47045	0.0472907
Cdc25a	-0.175129	-2.46941	0.0473582
Prom1	0.228257	2.46932	0.0473643
Sema7a	0.495189	2.46863	0.047409
Parp4	0.356209	2.46799	0.047451
Tspan1	0.349255	2.46678	0.0475303
Rab3il1	-0.253915	-2.46666	0.0475379
Mrps25	-0.237741	-2.46569	0.0476011
Acad10	-0.361667	-2.46544	0.047618
Tcta	0.182683	2.46517	0.0476353
Camkk1	-0.192843	-2.46487	0.0476551
Arhgef18	0.277519	2.46482	0.0476587
Oplah	0.470872	2.46336	0.0477541
Rnf157	-0.170699	-2.46317	0.0477669
Cachd1	-0.303787	-2.4628	0.0477912
Cd164l2	-0.284541	-2.46181	0.0478566
Plac8	0.59423	2.46148	0.0478785
Slc35c2	-0.161749	-2.46127	0.0478923
Oxnad1	0.276857	2.4612	0.0478964
Fbxo8	0.300138	2.46013	0.0479671
Rprd2	0.239552	2.45965	0.0479988
Snhg12	0.418843	2.45942	0.0480141
Ramp3	0.425998	2.45856	0.0480708
Mcm2	-0.433007	-2.4579	0.0481148
Pkp1	-0.199383	-2.45761	0.0481342
Hs6st2	-0.233876	-2.45655	0.0482043
Lrrc15	-0.208838	-2.45598	0.0482426
Ccdc134	-0.268847	-2.45542	0.0482795
Pvrl3	-0.154238	-2.45473	0.0483254
Msra	-0.236289	-2.45449	0.0483414
5830426C09Rik	-0.187717	-2.45431	0.0483533
Steap1	0.436138	2.45348	0.0484091
Kdm5d	2.65697	2.45329	0.0484213
Tubgcp4	-0.23332	-2.45162	0.0485327
Akr1c13	0.525123	2.45129	0.0485548
Hsd17b11	0.33096	2.44967	0.0486638
Acnat2	1.24401	2.44944	0.0486791
Sh3bp1	-0.203398	-2.44943	0.0486795
Tbc1d10a	0.238576	2.44939	0.0486825
Mrpl19	-0.239319	-2.44916	0.0486978
Pde10a	0.249727	2.44915	0.0486984
Trp53rka	0.172551	2.44783	0.0487869
Lrrn1	0.370652	2.44777	0.0487913
Igfbp3	0.276265	2.44755	0.0488062
Smagp	0.192283	2.44742	0.0488147
Trim36	0.223192	2.44687	0.0488515
Tiam2	0.239171	2.44512	0.0489699
Uty	3.10383	2.44417	0.0490338
Ptger4	0.537217	2.44017	0.0493055
Pcdh10	0.276071	2.43987	0.0493259
Pdcd6ip	0.328414	2.43963	0.0493423
Peli1	0.14449	2.43931	0.0493639
Mettl1	-0.227503	-2.43926	0.049367
D4Ertd335e	-0.23193	-2.43891	0.0493909
Irx3	0.203043	2.43886	0.0493944
Fbxo4	0.340612	2.43753	0.0494848
Bmf	0.33905	2.43659	0.0495493
Mreg	0.606612	2.43649	0.0495558
9330159M07Rik	-0.192953	-2.43537	0.0496329
Errfi1	0.940771	2.43532	0.0496363
Adgrb3	0.221818	2.43383	0.0497383
1700126A01Rik	-0.154138	-2.43338	0.0497692
Hsph1	-0.322532	-2.43319	0.0497823
Psrc1	-0.237362	-2.43133	0.0499101
Fst	0.181547	2.43121	0.0499188
Vps13c	-0.284337	-2.43008	0.0499967
