# Supplementary material for: Transcription factor TFCP2L1 patterns cells in the mouse kidney collecting ducts
Source: eLife. 2017 Jun 3;6:e24265. doi: 10.7554/eLife.24265 (PMC5484618; doi:10.7554/eLife.24265)
Supplement: Supplementary file 2. — Analysis by MACS. DOI: http://dx.doi.org/10.7554/eLife.24265.026 [file elife-24265-supp2.xlsx]

## Sheet: Supplementary File 2
Supplementary File 2. List of genomic regions bound by Tfcp2l1 in P1 mouse kidney identified by ChIPSeq (MACS 2.1.1, p<0.001 over IgG control)
chr	start	end	length	abs_summit	pileup	-LOG10(pvalue)	fold_enrichment	-LOG10(qvalue)	name
chr13	81025175	81025584	410	81025465	46	80.8918	34.7709	72.5113	peak1
chr12	17551587	17551796	210	17551690	51	79.7678	32.5378	71.55	peak2
chr2	167940537	167940764	228	167940642	34	62.1601	28.3522	54.8905	peak3
chr17	47875190	47875454	265	47875328	33	55.8629	25.9409	48.7288	peak4
chr19	5803574	5803762	189	5803666	39	54.3212	23.4823	47.2515	peak5
chr5	36071604	36071808	205	36071720	29	52.1699	24.5649	45.1545	peak6
chr11	75344957	75345154	198	75345045	36	51.6499	23.1519	44.669	peak7
chr16	5473717	5473915	199	5473804	36	51.6499	23.1519	44.669	peak8
chr8	59990392	59990587	196	59990475	28	50.0375	23.7461	43.1028	peak9
chr10	77888580	77888774	195	77888677	30	48.1314	22.934	41.2916	peak10
chr16	44139664	44139850	187	44139755	27	47.9199	22.9272	41.1118	peak11
chr13	81024869	81025061	193	81024965	40	46.8403	18.668	40.0726	peak12
chr2	132403833	132404008	176	132403925	33	46.3112	21.2747	39.552	peak13
chr6	30410742	30410914	173	30410832	26	44.5756	21.666	37.8932	peak14
chr4	139523568	139523723	156	139523648	25	40.5862	20.1069	34.0723	peak15
chr16	31509125	31509312	188	31509231	24	40.0113	19.8741	33.5274	peak16
chrX	71499977	71500167	191	71500072	23	39.6075	19.6519	33.1286	peak17
chr10	39254148	39254349	202	39254256	24	39.3025	19.6001	32.8458	peak18
chr19	45857974	45858125	152	45858049	28	37.6703	18.1461	31.2608	peak19
chr4	138204190	138204420	231	138204281	22	37.572	18.8331	31.1705	peak20
chr6	135117783	135117960	178	135117877	23	37.5662	18.903	31.1705	peak21
chr3	113332622	113332790	169	113332702	21	35.555	18.0143	29.2237	peak22
chr5	139848108	139848272	165	139848193	21	35.4914	17.9923	29.1692	peak23
chr3	110053015	110053179	165	110053098	26	34.3137	16.8946	28.0157	peak24
chr10	55826580	55826771	192	55826654	20	33.5573	17.1954	27.275	peak25
chr13	55291525	55291693	169	55291602	20	33.5573	17.1954	27.275	peak26
chr17	4908090	4908325	236	4908198	21	32.8985	17.0135	26.6527	peak27
chr7	105964610	105964812	203	105964723	30	32.0052	14.1148	25.7872	peak28
chr13	31065828	31066002	175	31065915	25	31.8302	15.8074	25.6189	peak29
chr7	130513568	130513723	156	130513643	19	31.2988	16.2786	25.1212	peak30
chr11	100256737	100256920	184	100256833	18	29.6234	15.5578	23.4846	peak31
chr4	135662870	135663083	214	135662961	18	29.6234	15.5578	23.4846	peak32
chr11	48630908	48631072	165	48631004	23	29.3987	15.0175	23.2896	peak33
chr6	136416903	136417392	490	136417024	18	28.9488	15.3185	22.8567	peak34
chr11	23155908	23156056	149	23155992	19	28.8315	15.3279	22.7433	peak35
chr7	87330949	87331128	180	87331031	22	27.7949	14.3917	21.7311	peak36
chr9	66643623	66643864	242	66643767	22	27.7949	14.3917	21.7311	peak37
chr19	44359244	44359396	153	44359309	17	27.6893	14.7389	21.6327	peak38
chr2	3430038	3430305	268	3430217	17	27.6893	14.7389	21.6327	peak39
chr12	88208746	88208913	168	88208824	19	27.6079	14.7961	21.5829	peak40
chr1	44176778	44176976	199	44176881	18	27.333	14.6935	21.3139	peak41
chr2	179663901	179664041	141	179663971	18	27.333	14.6935	21.3139	peak42
chr14	76905766	76905950	185	76905858	17	27.2412	14.5811	21.227	peak43
chr12	77356004	77356179	176	77356090	20	26.8092	14.296	20.8034	peak44
chr11	60988820	60988980	161	60988913	26	26.4361	12.2935	20.4342	peak45
chr12	111934481	111934649	169	111934573	21	26.3975	13.8698	20.3985	peak46
chr2	75542023	75542194	172	75542100	19	26.2932	14.1811	20.2974	peak47
chr19	29409021	29409210	190	29409117	21	26.2095	13.766	20.2147	peak48
chr4	119212029	119212208	180	119212122	21	26.2095	13.766	20.2147	peak49
chr18	36092600	36092828	229	36092693	17	26.1631	14.1772	20.1826	peak50
chr2	64983612	64983779	168	64983686	16	25.7786	13.9201	19.8032	peak51
chr9	96606126	96606319	194	96606223	16	25.7786	13.9201	19.8032	peak52
chr11	28753185	28753321	137	28753255	16	25.3557	13.7711	19.4095	peak53
chr3	95021335	95021475	141	95021405	20	24.6433	13.1403	18.719	peak54
chr7	148653160	148653330	171	148653234	16	24.4981	13.4517	18.5874	peak55
chr15	77629220	77629383	164	77629305	15	23.8927	13.1013	17.9904	peak56
chr5	53370803	53370957	155	53370875	15	23.8927	13.1013	17.9904	peak57
chr5	66425936	66426063	128	66426020	15	23.8927	13.1013	17.9904	peak58
chr4	62713502	62713652	151	62713570	15	23.8467	13.0853	17.975	peak59
chr4	133523802	133523959	158	133523884	24	23.744	11.3829	17.8745	peak60
chr4	138529017	138529198	182	138529109	16	23.7323	13.1468	17.8673	peak61
chr4	140981989	140982158	170	140982078	16	23.7323	13.1468	17.8673	peak62
chr3	9520683	9520833	151	9520752	15	23.495	12.961	17.6418	peak63
chr9	110586129	110586288	160	110586202	15	23.495	12.961	17.6418	peak64
chr16	20717303	20717494	192	20717390	15	23.1608	12.8391	17.3243	peak65
chr2	25084154	25084348	195	25084241	19	23.0973	12.5146	17.2622	peak66
chr10	127184405	127184581	177	127184499	23	22.423	10.9276	16.6097	peak67
chr11	115891847	115892006	160	115891918	23	22.423	10.9276	16.6097	peak68
chr13	102571287	102571485	199	102571383	14	22.0332	12.2825	16.2289	peak69
chr11	77978947	77979107	161	77979040	15	21.9684	12.3735	16.19	peak70
chr1	60237576	60237850	275	60237665	14	21.6606	12.151	15.8948	peak71
chr2	25018659	25018819	161	25018729	14	21.6606	12.151	15.8948	peak72
chr7	88138228	88138451	224	88138376	14	21.6606	12.151	15.8948	peak73
chr7	142938856	142939047	192	142938957	14	21.6606	12.151	15.8948	peak74
chr10	69707785	69707959	175	69707868	18	21.5725	11.8888	15.8197	peak75
chr19	44825451	44825607	157	44825527	18	21.5725	11.8888	15.8197	peak76
chr2	164630544	164630720	177	164630640	18	21.5725	11.8888	15.8197	peak77
chr5	33780970	33781166	197	33781055	18	21.5725	11.8888	15.8197	peak78
chr11	68901923	68902115	193	68902019	15	21.3181	12.0992	15.5808	peak79
chr11	109334485	109334680	196	109334594	25	20.7531	9.30427	15.0296	peak80
chr6	102514518	102514661	144	102514578	15	20.7254	11.8369	15.0062	peak81
chr10	98725705	98725842	138	98725761	14	20.36	11.653	14.6459	peak82
chr11	49064027	49064186	160	49064104	16	20.3343	11.573	14.6221	peak83
chr19	10783887	10784058	172	10783974	14	20.2308	11.6001	14.5203	peak84
chr3	145650728	145650943	216	145650853	14	20.2308	11.6001	14.5203	peak85
chr11	114688176	114688335	160	114688239	13	20.2016	11.4636	14.5007	peak86
chr12	78882541	78882699	159	78882632	13	20.2016	11.4636	14.5007	peak87
chr4	123310618	123310775	158	123310679	13	20.2016	11.4636	14.5007	peak88
chr1	135753327	135753501	175	135753413	17	20.0698	11.2631	14.3897	peak89
chr10	80876705	80876943	239	80876837	17	20.0698	11.2631	14.3897	peak90
chr11	69394990	69395186	197	69395071	17	20.0698	11.2631	14.3897	peak91
chr8	108089967	108090191	225	108090058	17	20.0698	11.2631	14.3897	peak92
chr5	32761085	32761273	189	32761163	13	20.0057	11.395	14.339	peak93
chr11	61890474	61890700	227	61890571	13	19.8542	11.3409	14.1897	peak94
chr8	108051168	108051351	184	108051261	13	19.7064	11.2873	14.0589	peak95
chr1	137271526	137271681	156	137271603	15	19.6782	11.3449	14.0323	peak96
chr9	30939352	30939537	186	30939445	14	19.6218	11.343	13.9776	peak97
chr14	55373518	55373739	222	55373596	13	19.5623	11.2342	13.9205	peak98
chr12	104563759	104563977	219	104563844	13	19.1499	11.0779	13.5159	peak99
chr19	18705079	18705253	175	18705159	14	19.0669	11.0971	13.4343	peak100
chr13	120251445	120251609	165	120251525	13	18.8903	10.9761	13.2615	peak101
chr13	99464832	99464984	153	99464899	16	18.5906	10.6374	12.9645	peak102
chr14	23603021	23603167	147	23603074	16	18.5906	10.6374	12.9645	peak103
chr16	5013813	5013984	172	5013903	16	18.5906	10.6374	12.9645	peak104
chr17	43214144	43214287	144	43214213	16	18.5906	10.6374	12.9645	peak105
chr17	56447702	56447839	138	56447768	16	18.5906	10.6374	12.9645	peak106
chr14	76904359	76904508	150	76904446	13	18.5212	10.8268	12.9232	peak107
chr1	16083279	16083499	221	16083373	12	18.3999	10.6448	12.8135	peak108
chr10	41606999	41607181	183	41607086	12	18.3999	10.6448	12.8135	peak109
chr10	84921876	84922018	143	84921934	12	18.3999	10.6448	12.8135	peak110
chr11	100599558	100599831	274	100599758	12	18.3999	10.6448	12.8135	peak111
chr16	19760372	19760502	131	19760417	12	18.3999	10.6448	12.8135	peak112
chr16	33306796	33306938	143	33306854	12	18.3999	10.6448	12.8135	peak113
chr1	71699298	71699446	149	71699375	12	18.3625	10.6318	12.7996	peak114
chr10	101974489	101974621	133	101974547	12	18.2182	10.5811	12.6572	peak115
chr9	7977734	7977931	198	7977807	14	18.0865	10.6359	12.5297	peak116
chr12	111619665	111619854	190	111619759	12	18.0776	10.5308	12.5227	peak117
chr14	105576500	105576684	185	105576592	12	18.0776	10.5308	12.5227	peak118
chr3	30755194	30755371	178	30755265	12	18.0776	10.5308	12.5227	peak119
chr5	23933742	23933885	144	23933805	12	18.0776	10.5308	12.5227	peak120
chr5	106129718	106129881	164	106129821	12	18.0776	10.5308	12.5227	peak121
chr5	115224848	115225019	172	115224936	15	17.9797	10.4742	12.4359	peak122
chr13	47201230	47201366	137	47201309	17	17.6888	9.8866	12.1514	peak123
chr11	79042614	79042862	249	79042802	13	17.4364	10.3573	11.9012	peak124
chr2	157290670	157290860	191	157290757	13	17.4364	10.3573	11.9012	peak125
chr13	96095685	96095859	175	96095769	15	17.136	10.0116	11.6146	peak126
chr14	26300918	26301121	204	26301027	15	17.136	10.0116	11.6146	peak127
chr15	73343405	73343572	168	73343497	15	17.136	10.0116	11.6146	peak128
chr17	80879753	80879905	153	80879820	15	17.136	10.0116	11.6146	peak129
chr18	73783965	73784127	163	73784056	15	17.136	10.0116	11.6146	peak130
chr2	150137095	150137279	185	150137184	15	17.136	10.0116	11.6146	peak131
chr7	31936370	31936544	175	31936460	15	17.136	10.0116	11.6146	peak132
chr7	135148355	135148634	280	135148549	15	17.136	10.0116	11.6146	peak133
chr13	93300953	93301083	131	93301031	12	16.8414	10.0534	11.3404	peak134
chr16	58727989	58728133	145	58728058	12	16.8414	10.0534	11.3404	peak135
chr2	38514136	38514271	136	38514203	12	16.8414	10.0534	11.3404	peak136
chr8	10924615	10924781	167	10924694	12	16.8414	10.0534	11.3404	peak137
chr9	37464880	37465052	173	37464970	12	16.8414	10.0534	11.3404	peak138
chr11	115773196	115773338	143	115773261	11	16.6303	9.82596	11.1424	peak139
chr12	7827134	7827291	158	7827217	11	16.6303	9.82596	11.1424	peak140
chr12	77919135	77919296	162	77919210	11	16.6303	9.82596	11.1424	peak141
chr14	47987364	47987566	203	47987451	11	16.6303	9.82596	11.1424	peak142
chr17	33980008	33980143	136	33980084	11	16.6303	9.82596	11.1424	peak143
chr17	45738934	45739055	122	45738986	11	16.6303	9.82596	11.1424	peak144
chr19	30591319	30591493	175	30591398	11	16.6303	9.82596	11.1424	peak145
chr2	83599390	83599565	176	83599481	11	16.6303	9.82596	11.1424	peak146
chr3	51850040	51850169	130	51850124	11	16.6303	9.82596	11.1424	peak147
chr3	65726530	65726683	154	65726612	11	16.6303	9.82596	11.1424	peak148
chr3	95471995	95472103	109	95472055	11	16.6303	9.82596	11.1424	peak149
chr4	102986216	102986379	164	102986295	11	16.6303	9.82596	11.1424	peak150
chr4	131885347	131885485	139	131885408	11	16.6303	9.82596	11.1424	peak151
chr7	87223652	87223788	137	87223714	11	16.6303	9.82596	11.1424	peak152
chr9	50537846	50537979	134	50537926	11	16.6303	9.82596	11.1424	peak153
chr9	108198971	108199103	133	108199015	11	16.6303	9.82596	11.1424	peak154
chrX	92222097	92222244	148	92222165	11	16.6303	9.82596	11.1424	peak155
chr7	134614627	134614804	178	134614713	11	16.5958	9.81397	11.1411	peak156
chr4	82152360	82152481	122	82152414	13	16.5228	9.9268	11.0693	peak157
chr7	80763282	80763453	172	80763365	14	16.497	9.81959	11.0464	peak158
chr3	157197450	157197600	151	157197527	11	16.3332	9.72077	10.8896	peak159
chr5	135164451	135164605	155	135164523	11	16.3332	9.72077	10.8896	peak160
chr8	97666279	97666469	191	97666358	11	16.3332	9.72077	10.8896	peak161
chr8	114255959	114256231	273	114256054	11	16.3332	9.72077	10.8896	peak162
chr15	94459372	94459562	191	94459453	18	16.0991	8.651	10.6708	peak163
chr12	77471399	77471533	135	77471458	12	15.8357	9.61748	10.412	peak164
chr7	96552168	96552338	171	96552246	13	15.7347	9.53068	10.3167	peak165
chr7	127820975	127821110	136	127821055	13	15.7347	9.53068	10.3167	peak166
chr8	74093285	74093445	161	74093351	13	15.7347	9.53068	10.3167	peak167
chr16	32815393	32815533	141	32815456	14	15.7077	9.38592	10.2943	peak168
chr17	25023671	25023804	134	25023746	14	15.7077	9.38592	10.2943	peak169
chr9	102681948	102682095	148	102682018	14	15.7077	9.38592	10.2943	peak170
chr11	116686791	116686928	138	116686843	11	15.2967	9.32237	9.90361	peak171
chr16	11365831	11365998	168	11365906	11	15.1938	9.28011	9.80375	peak172
chr7	117917361	117917493	133	117917414	11	15.1938	9.28011	9.80375	peak173
chr9	96406450	96406581	132	96406510	11	15.1938	9.28011	9.80375	peak174
chr19	28735482	28735623	142	28735552	11	15.0929	9.23823	9.71463	peak175
chr10	95102795	95102923	129	95102884	12	14.989	9.21774	9.6158	peak176
chr13	96304249	96304369	121	96304322	12	14.989	9.21774	9.6158	peak177
chr1	174172543	174172676	134	174172611	10	14.8954	9.00713	9.52616	peak178
chr1	189647495	189647625	131	189647552	10	14.8954	9.00713	9.52616	peak179
chr10	79324135	79324260	126	79324201	10	14.8954	9.00713	9.52616	peak180
chr11	110847334	110847634	301	110847403	10	14.8954	9.00713	9.52616	peak181
chr11	120092833	120093013	181	120092923	10	14.8954	9.00713	9.52616	peak182
chr12	113384350	113384505	156	113384412	10	14.8954	9.00713	9.52616	peak183
chr13	104711234	104711404	171	104711320	17	14.8968	8.19568	9.52616	peak184
chr15	36365003	36365124	122	36365051	10	14.8954	9.00713	9.52616	peak185
chr15	101025710	101025897	188	101025800	10	14.8954	9.00713	9.52616	peak186
chr16	18211956	18212146	191	18212049	10	14.8954	9.00713	9.52616	peak187
chr19	16510368	16510516	149	16510433	10	14.8954	9.00713	9.52616	peak188
chr19	47091091	47091264	174	47091180	10	14.8954	9.00713	9.52616	peak189
chr2	76272415	76272561	147	76272490	10	14.8638	8.99614	9.52616	peak190
chr2	84776732	84776907	176	84776822	10	14.8954	9.00713	9.52616	peak191
chr2	164230240	164230438	199	164230342	10	14.8638	8.99614	9.52616	peak192
chr4	141765921	141766060	140	141765976	10	14.8954	9.00713	9.52616	peak193
chr5	48737001	48737172	172	48737088	10	14.8954	9.00713	9.52616	peak194
chr5	111822947	111823082	136	111823011	10	14.8954	9.00713	9.52616	peak195
chr5	138148129	138148264	136	138148199	10	14.8954	9.00713	9.52616	peak196
chr6	71221548	71221704	157	71221618	10	14.8954	9.00713	9.52616	peak197
chr6	108406758	108406938	181	108406843	10	14.8954	9.00713	9.52616	peak198
chr8	15013102	15013229	128	15013169	10	14.8954	9.00713	9.52616	peak199
chr9	13300891	13301032	142	13300959	10	14.8954	9.00713	9.52616	peak200
chr9	21142187	21142328	142	21142251	10	14.8954	9.00713	9.52616	peak201
chrX	50144280	50144480	201	50144423	10	14.8954	9.00713	9.52616	peak202
chr2	164387957	164388090	134	164388019	10	14.7421	8.95322	9.41837	peak203
chr5	136470665	136470792	128	136470725	10	14.7421	8.95322	9.41837	peak204
chr4	22284529	22284723	195	22284616	22	14.6923	6.77955	9.37352	peak205
chr11	89863988	89864109	122	89864045	10	14.6235	8.9107	9.30491	peak206
chr13	54333022	54333164	143	54333086	10	14.6235	8.9107	9.30491	peak207
chr16	37539703	37539852	150	37539783	10	14.6235	8.9107	9.30491	peak208
chr19	56989710	56989882	173	56989792	10	14.6235	8.9107	9.30491	peak209
chr2	30663088	30663253	166	30663165	10	14.6235	8.9107	9.30491	peak210
chr3	159510683	159510841	159	159510763	10	14.6235	8.9107	9.30491	peak211
chr4	140192273	140192425	153	140192348	10	14.6235	8.9107	9.30491	peak212
chr5	53746417	53746546	130	53746489	10	14.6235	8.9107	9.30491	peak213
chr6	146409579	146409713	135	146409650	10	14.6235	8.9107	9.30491	peak214
chr7	150310274	150310469	196	150310399	10	14.6235	8.9107	9.30491	peak215
chr15	87487298	87487434	137	87487369	10	14.5078	8.86859	9.20817	peak216
chr1	72353872	72353996	125	72353936	13	14.3073	8.76019	9.01171	peak217
chr1	182478128	182478256	129	182478202	13	14.3073	8.76019	9.01171	peak218
chr11	11709294	11709427	134	11709368	13	14.3073	8.76019	9.01171	peak219
chr13	104710797	104710956	160	104710883	13	14.3073	8.76019	9.01171	peak220
chr18	75526527	75526696	170	75526605	13	14.3073	8.76019	9.01171	peak221
chr18	80745564	80745699	136	80745639	13	14.3073	8.76019	9.01171	peak222
chr2	76402101	76402291	191	76402193	13	14.3073	8.76019	9.01171	peak223
chr2	126758623	126758738	116	126758695	13	14.3073	8.76019	9.01171	peak224
chr2	172825625	172825771	147	172825676	13	14.3073	8.76019	9.01171	peak225
chr3	30993583	30993693	111	30993630	13	14.3073	8.76019	9.01171	peak226
chr5	139409185	139409316	132	139409236	13	14.3073	8.76019	9.01171	peak227
chr7	106648843	106649004	162	106648925	11	14.267	8.87767	8.98946	peak228
chr2	130490282	130490402	121	130490345	12	14.2586	8.84991	8.9863	peak229
chr7	137690350	137690539	190	137690423	19	14.0483	7.15713	8.78077	peak230
chr10	5958392	5958579	188	5958483	10	13.8694	8.62405	8.60335	peak231
chr15	97730890	97731018	129	97730947	13	13.8695	8.5117	8.60335	peak232
chr18	36034738	36034891	154	36034799	10	13.7711	8.5846	8.50608	peak233
chr4	129496967	129497247	281	129497052	21	13.7074	6.48479	8.44534	peak234
chr16	45844355	45844528	174	45844433	12	13.6172	8.51031	8.35667	peak235
chr11	6191770	6191893	124	6191839	10	13.5807	8.50677	8.32206	peak236
chr13	43960031	43960219	189	43960123	10	13.5807	8.50677	8.32206	peak237
chr3	40999396	40999542	147	40999447	10	13.5807	8.50677	8.32206	peak238
chr3	89855770	89855921	152	89855848	10	13.5807	8.50677	8.32206	peak239
chr6	124758801	124758939	139	124758869	10	13.5807	8.50677	8.32206	peak240
chr7	51783470	51783603	134	51783536	10	13.5807	8.50677	8.32206	peak241
chr8	97855452	97855643	192	97855540	10	13.5807	8.50677	8.32206	peak242
chr2	31828201	31828315	115	31828258	11	13.4871	8.50869	8.23972	peak243
chr2	167980138	167980299	162	167980220	11	13.4871	8.50869	8.23972	peak244
chr3	88259555	88259667	113	88259612	11	13.4871	8.50869	8.23972	peak245
chr4	139178916	139179068	153	139178997	11	13.4871	8.50869	8.23972	peak246
chr5	138071617	138071736	120	138071667	11	13.4871	8.50869	8.23972	peak247
chr19	46578242	46578372	131	46578299	10	13.398	8.43034	8.15519	peak248
chr1	182724309	182724537	229	182724367	9	13.1981	8.1883	7.9564	peak249
chr11	11722311	11722475	165	11722383	9	13.1981	8.1883	7.9564	peak250
chr11	101648098	101648309	212	101648167	9	13.1981	8.1883	7.9564	peak251
chr12	72075801	72076006	206	72075933	9	13.1981	8.1883	7.9564	peak252
chr13	29861558	29861727	170	29861655	9	13.1981	8.1883	7.9564	peak253
chr13	29869247	29869379	133	29869334	9	13.1981	8.1883	7.9564	peak254
chr13	38000058	38000194	137	38000120	9	13.1981	8.1883	7.9564	peak255
chr13	57622670	57622830	161	57622759	9	13.1981	8.1883	7.9564	peak256
chr13	67825310	67825427	118	67825368	9	13.1981	8.1883	7.9564	peak257
chr14	35171341	35171474	134	35171392	9	13.1981	8.1883	7.9564	peak258
chr16	92359581	92359751	171	92359668	9	13.1981	8.1883	7.9564	peak259
chr17	27601632	27601782	151	27601699	9	13.1981	8.1883	7.9564	peak260
chr17	28622960	28623089	130	28623049	9	13.1981	8.1883	7.9564	peak261
chr17	43076572	43076717	146	43076624	9	13.1981	8.1883	7.9564	peak262
chr19	57492633	57492890	258	57492716	9	13.1981	8.1883	7.9564	peak263
chr3	16604433	16604611	179	16604518	9	13.1981	8.1883	7.9564	peak264
chr3	67148670	67148804	135	67148717	9	13.1981	8.1883	7.9564	peak265
chr3	97115984	97116098	115	97116040	9	13.1981	8.1883	7.9564	peak266
chr3	109425261	109425460	200	109425416	9	13.1981	8.1883	7.9564	peak267
chr4	148946066	148946217	152	148946142	9	13.1981	8.1883	7.9564	peak268
chr5	21467732	21467902	171	21467810	9	13.1981	8.1883	7.9564	peak269
chr5	24036001	24036145	145	24036068	9	13.1981	8.1883	7.9564	peak270
chr5	101148608	101148734	127	101148667	9	13.1981	8.1883	7.9564	peak271
chr5	112914506	112914637	132	112914563	9	13.1981	8.1883	7.9564	peak272
chr6	93707462	93707624	163	93707538	9	13.1981	8.1883	7.9564	peak273
chr6	121012897	121013067	171	121012993	9	13.1981	8.1883	7.9564	peak274
chr7	107811831	107812010	180	107811918	9	13.1981	8.1883	7.9564	peak275
chr7	134860575	134860691	117	134860639	9	13.1981	8.1883	7.9564	peak276
chr8	109633428	109633545	118	109633469	9	13.1981	8.1883	7.9564	peak277
chr8	111709944	111710104	161	111710008	9	13.1981	8.1883	7.9564	peak278
chr8	123637254	123637429	176	123637334	9	13.1981	8.1883	7.9564	peak279
chr8	127201454	127201625	172	127201546	9	13.1981	8.1883	7.9564	peak280
chr8	127727069	127727216	148	127727146	9	13.1981	8.1883	7.9564	peak281
chr9	106691340	106691528	189	106691436	9	13.1981	8.1883	7.9564	peak282
chr10	75235913	75236060	148	75236002	9	13.059	8.13929	7.86718	peak283
chr2	25476719	25476852	134	25476794	9	13.059	8.13929	7.86718	peak284
chr8	120037023	120037137	115	120037075	9	13.059	8.13929	7.86718	peak285
chr10	82608679	82608892	214	82608769	12	12.9367	8.13446	7.76441	peak286
chr10	126342699	126342829	131	126342754	9	12.9514	8.10064	7.76441	peak287
chr11	79438475	79438636	162	79438572	9	12.9514	8.10064	7.76441	peak288
chr11	107604491	107604672	182	107604575	12	12.9367	8.13446	7.76441	peak289
chr13	54788990	54789115	126	54789057	12	12.9367	8.13446	7.76441	peak290
chr15	76555164	76555326	163	76555246	12	12.9367	8.13446	7.76441	peak291
chr17	28360672	28360875	204	28360785	9	12.9514	8.10064	7.76441	peak292
chr18	23143604	23143789	186	23143699	9	12.9514	8.10064	7.76441	peak293
chr18	38095178	38095341	164	38095266	9	12.9514	8.10064	7.76441	peak294
chr18	75625296	75625465	170	75625379	12	12.9367	8.13446	7.76441	peak295
chr19	25478793	25478909	117	25478866	9	12.9514	8.10064	7.76441	peak296
chr2	27849093	27849210	118	27849121	9	12.9514	8.10064	7.76441	peak297
chr2	69044010	69044209	200	69044105	9	12.9514	8.10064	7.76441	peak298
chr2	179759378	179759539	162	179759457	12	12.9367	8.13446	7.76441	peak299
chr3	97902674	97902841	168	97902759	12	12.9367	8.13446	7.76441	peak300
chr4	95150364	95150493	130	95150428	9	12.9514	8.10064	7.76441	peak301
chr4	139534789	139534892	104	139534851	12	12.9367	8.13446	7.76441	peak302
chr4	147505619	147505752	134	147505668	9	12.9514	8.10064	7.76441	peak303
chr4	151311647	151311791	145	151311719	12	12.9367	8.13446	7.76441	peak304
chr5	135417706	135417890	185	135417790	12	12.9367	8.13446	7.76441	peak305
chr5	140808096	140808223	128	140808172	12	12.9367	8.13446	7.76441	peak306
chr6	17231151	17231261	111	17231228	9	12.9514	8.10064	7.76441	peak307
chr6	52171748	52171893	146	52171820	12	12.9367	8.13446	7.76441	peak308
chr6	100237381	100237526	146	100237458	12	12.9367	8.13446	7.76441	peak309
chr7	77503786	77503889	104	77503834	12	12.9367	8.13446	7.76441	peak310
chr7	118425948	118426096	149	118426005	12	12.9367	8.13446	7.76441	peak311
chr8	59991094	59991254	161	59991167	12	12.9367	8.13446	7.76441	peak312
chr9	34974489	34974633	145	34974542	9	12.9514	8.10064	7.76441	peak313
chr10	85757715	85757833	119	85757784	9	12.8464	8.06236	7.69598	peak314
chr12	77604078	77604286	209	77604190	9	12.7441	8.02443	7.5976	peak315
chr19	46599257	46599378	122	46599316	9	12.7441	8.02443	7.5976	peak316
chr5	37336613	37336797	185	37336703	9	12.7441	8.02443	7.5976	peak317
chr17	5125610	5125783	174	5125671	10	12.733	8.13787	7.58803	peak318
chr2	173003608	173003749	142	173003665	10	12.733	8.13787	7.58803	peak319
chr4	133912278	133912474	197	133912406	10	12.733	8.13787	7.58803	peak320
chr8	97507824	97507946	123	97507879	10	12.733	8.13787	7.58803	peak321
chr5	125621762	125621910	149	125621834	9	12.6442	7.98686	7.50446	peak322
chr11	29426248	29426456	209	29426337	15	12.5633	7.28505	7.42543	peak323
chr11	85646300	85646422	123	85646376	15	12.5633	7.28505	7.42543	peak324
chr15	79572466	79572596	131	79572523	15	12.5633	7.28505	7.42543	peak325
chr7	29355362	29355644	283	29355444	15	12.5633	7.28505	7.42543	peak326
chr17	27993991	27994108	118	27994034	11	12.2243	7.85567	7.09235	peak327
chr10	7401252	7401539	288	7401386	10	12.0199	7.79963	6.89156	peak328
chr12	79327015	79327203	189	79327085	10	12.0199	7.79963	6.89156	peak329
chr13	81024000	81024133	134	81024064	10	12.0199	7.79963	6.89156	peak330
chr15	58720931	58721096	166	58721002	10	12.0199	7.79963	6.89156	peak331
chr19	46072644	46072766	123	46072690	10	12.0199	7.79963	6.89156	peak332
chr6	90413809	90413997	189	90413915	10	12.0199	7.79963	6.89156	peak333
chr10	20672511	20672624	114	20672548	9	12.0054	7.73342	6.88253	peak334
chr11	93816935	93817091	157	93817011	9	12.0054	7.73342	6.88253	peak335
chr11	116714756	116714881	126	116714801	9	12.0054	7.73342	6.88253	peak336
chr11	116953162	116953413	252	116953255	9	12.0054	7.73342	6.88253	peak337
chr16	4558155	4558304	150	4558219	9	12.0054	7.73342	6.88253	peak338
chr4	119925143	119925254	112	119925188	9	12.0054	7.73342	6.88253	peak339
chr6	34129154	34129265	112	34129223	9	12.0054	7.73342	6.88253	peak340
chr6	113941702	113941831	130	113941796	9	12.0054	7.73342	6.88253	peak341
chr7	150195015	150195164	150	150195104	9	12.0054	7.73342	6.88253	peak342
chrX	91077393	91077540	148	91077458	9	12.0054	7.73342	6.88253	peak343
chr5	125645299	125645445	147	125645358	9	11.9217	7.69853	6.81313	peak344
chr10	80747116	80747231	116	80747157	9	11.8397	7.66394	6.73147	peak345
chr2	91771862	91772032	171	91771910	9	11.6804	7.5957	6.57304	peak346
chr6	83085372	83085629	258	83085513	9	11.6804	7.5957	6.57304	peak347
chr17	87714399	87714576	178	87714483	9	11.603	7.56203	6.49699	peak348
chr10	62383355	62383483	129	62383432	11	11.5981	7.50873	6.49262	peak349
chr10	85420237	85420421	185	85420327	11	11.5981	7.50873	6.49262	peak350
chr10	92623263	92623464	202	92623384	11	11.5981	7.50873	6.49262	peak351
chr11	58121242	58121373	132	58121312	11	11.5981	7.50873	6.49262	peak352
chr11	98635044	98635192	149	98635105	11	11.5981	7.50873	6.49262	peak353
chr12	111611784	111611915	132	111611831	11	11.5981	7.50873	6.49262	peak354
chr17	26012371	26012515	145	26012462	11	11.5981	7.50873	6.49262	peak355
chr17	47191691	47191815	125	47191735	11	11.5981	7.50873	6.49262	peak356
chr18	61510171	61510298	128	61510257	11	11.5981	7.50873	6.49262	peak357
chr3	96592574	96592724	151	96592641	11	11.5981	7.50873	6.49262	peak358
chr4	88584396	88584500	105	88584424	11	11.5981	7.50873	6.49262	peak359
chr5	123157871	123158039	169	123157965	11	11.5981	7.50873	6.49262	peak360
chr5	138187018	138187149	132	138187092	11	11.5981	7.50873	6.49262	peak361
chr6	87672797	87672950	154	87672877	11	11.5981	7.50873	6.49262	peak362
chr6	125271272	125271425	154	125271345	11	11.5981	7.50873	6.49262	peak363
chr7	105307125	105307247	123	105307186	11	11.5981	7.50873	6.49262	peak364
chr8	106106572	106106704	133	106106628	11	11.5981	7.50873	6.49262	peak365
chr8	108160623	108160758	136	108160675	11	11.5981	7.50873	6.49262	peak366
chr8	123901730	123901930	201	123901812	11	11.5981	7.50873	6.49262	peak367
chr1	5073454	5073618	165	5073528	8	11.5421	7.36947	6.46017	peak368
chr1	31006677	31006788	112	31006731	8	11.5421	7.36947	6.46017	peak369
chr1	153553368	153553469	102	153553411	8	11.5421	7.36947	6.46017	peak370
chr1	156853783	156853927	145	156853837	8	11.5421	7.36947	6.46017	peak371
chr10	39777695	39777819	125	39777770	8	11.5421	7.36947	6.46017	peak372
chr10	61777031	61777142	112	61777095	8	11.5421	7.36947	6.46017	peak373
chr11	83697654	83697781	128	83697712	8	11.5421	7.36947	6.46017	peak374
chr12	45310889	45311014	126	45310951	8	11.5421	7.36947	6.46017	peak375
chr12	78797235	78797386	152	78797316	8	11.5421	7.36947	6.46017	peak376
chr12	80130125	80130249	125	80130213	8	11.5421	7.36947	6.46017	peak377
chr15	74271072	74271212	141	74271125	8	11.5421	7.36947	6.46017	peak378
chr15	78580369	78580531	163	78580435	8	11.5421	7.36947	6.46017	peak379
chr15	89005300	89005534	235	89005383	8	11.5421	7.36947	6.46017	peak380
chr16	50732944	50733045	102	50732980	8	11.5421	7.36947	6.46017	peak381
chr17	21082381	21082504	124	21082432	8	11.5164	7.36048	6.46017	peak382
chr17	29041801	29041919	119	29041880	8	11.5421	7.36947	6.46017	peak383
chr17	35804518	35804851	334	35804581	8	11.5421	7.36947	6.46017	peak384
chr18	35974828	35974953	126	35974888	8	11.5421	7.36947	6.46017	peak385
chr18	60803309	60803436	128	60803365	8	11.5421	7.36947	6.46017	peak386
chr18	79305463	79305602	140	79305520	8	11.5421	7.36947	6.46017	peak387
chr18	84815639	84815792	154	84815707	8	11.5421	7.36947	6.46017	peak388
chr19	8945777	8945938	162	8945850	8	11.5421	7.36947	6.46017	peak389
chr19	33064434	33064542	109	33064481	8	11.5421	7.36947	6.46017	peak390
chr2	25036036	25036166	131	25036100	8	11.5421	7.36947	6.46017	peak391
chr2	119062694	119062857	164	119062769	8	11.5421	7.36947	6.46017	peak392
chr2	160630959	160631132	174	160631055	8	11.5421	7.36947	6.46017	peak393
chr3	104621277	104621528	252	104621345	8	11.5421	7.36947	6.46017	peak394
chr3	146008287	146008407	121	146008335	8	11.5421	7.36947	6.46017	peak395
chr4	53271741	53271874	134	53271812	8	11.5421	7.36947	6.46017	peak396
chr4	64850108	64850240	133	64850188	8	11.5421	7.36947	6.46017	peak397
chr4	88161685	88161849	165	88161768	8	11.5421	7.36947	6.46017	peak398
chr4	114050290	114050398	109	114050324	8	11.5421	7.36947	6.46017	peak399
chr4	117559991	117560219	229	117560160	8	11.5421	7.36947	6.46017	peak400
chr4	141062487	141062689	203	141062547	8	11.5421	7.36947	6.46017	peak401
chr4	149770503	149770646	144	149770582	8	11.5421	7.36947	6.46017	peak402
chr5	105844549	105844670	122	105844611	8	11.5421	7.36947	6.46017	peak403
chr6	29410725	29410845	121	29410792	8	11.5421	7.36947	6.46017	peak404
chr6	30307935	30308057	123	30307987	8	11.5421	7.36947	6.46017	peak405
chr8	25469565	25469751	187	25469618	8	11.5421	7.36947	6.46017	peak406
chr8	56200159	56200279	121	56200225	8	11.5421	7.36947	6.46017	peak407
chr8	71404577	71404696	120	71404618	8	11.5164	7.36048	6.46017	peak408
chr8	86545185	86545304	120	86545232	8	11.5421	7.36947	6.46017	peak409
chr8	92199960	92200069	110	92200009	8	11.5421	7.36947	6.46017	peak410
chr10	36856882	36857007	126	36856945	9	11.4525	7.49557	6.42848	peak411
chr12	88488083	88488194	112	88488125	8	11.4172	7.32536	6.39677	peak412
chr2	74535770	74535932	163	74535841	8	11.4172	7.32536	6.39677	peak413
chr11	120401263	120401387	125	120401330	10	11.4053	7.48839	6.38801	peak414
chr19	3323256	3323401	146	3323312	10	11.4053	7.48839	6.38801	peak415
chr19	5490292	5490550	259	5490353	10	11.4053	7.48839	6.38801	peak416
chr3	9174461	9174599	139	9174522	10	11.4053	7.48839	6.38801	peak417
chr3	57379780	57379894	115	57379801	10	11.4053	7.48839	6.38801	peak418
chr9	120405940	120406052	113	120406023	9	11.3793	7.46279	6.36507	peak419
chr1	97348542	97348649	108	97348595	8	11.3205	7.29058	6.30641	peak420
chr1	155022192	155022353	162	155022275	8	11.3205	7.29058	6.30641	peak421
chr11	113479958	113480075	118	113480040	8	11.3205	7.29058	6.30641	peak422
chr11	115971564	115971707	144	115971623	8	11.3205	7.29058	6.30641	peak423
chr13	55506913	55507046	134	55506958	8	11.3205	7.29058	6.30641	peak424
chr15	84831651	84831759	109	84831705	8	11.3205	7.29058	6.30641	peak425
chr17	31927842	31927950	109	31927927	8	11.3205	7.29058	6.30641	peak426
chr18	38094978	38095099	122	38095032	8	11.3205	7.29058	6.30641	peak427
chr19	24805978	24806092	115	24806059	8	11.3205	7.29058	6.30641	peak428
chr2	90955273	90955416	144	90955343	8	11.3205	7.29058	6.30641	peak429
chr3	130521745	130521854	110	130521796	8	11.3205	7.29058	6.30641	peak430
chr4	9561413	9561521	109	9561465	8	11.3205	7.29058	6.30641	peak431
chr4	46139526	46139647	122	46139583	8	11.3205	7.29058	6.30641	peak432
chr4	118100399	118100533	135	118100447	8	11.3205	7.29058	6.30641	peak433
chr4	129849189	129849294	106	129849227	8	11.3205	7.29058	6.30641	peak434
chr5	112824219	112824386	168	112824304	8	11.3205	7.29058	6.30641	peak435
chr7	52125006	52125120	115	52125027	8	11.3205	7.29058	6.30641	peak436
chr7	137812612	137812745	134	137812682	8	11.3205	7.29058	6.30641	peak437
chr8	129961599	129961732	134	129961678	8	11.3205	7.29058	6.30641	peak438
chr10	76495301	76495466	166	76495385	9	11.2366	7.39806	6.24035	peak439
chr11	51817731	51817871	141	51817811	9	11.2366	7.39806	6.24035	peak440
chr11	74452085	74452213	129	74452163	9	11.2366	7.39806	6.24035	peak441
chr2	118526054	118526193	140	118526105	9	11.2366	7.39806	6.24035	peak442
chr3	8667308	8667441	134	8667387	9	11.2366	7.39806	6.24035	peak443
chr4	117559438	117559539	102	117559486	9	11.2366	7.39806	6.24035	peak444
chr7	134387781	134387909	129	134387845	9	11.2366	7.39806	6.24035	peak445
chr9	58883987	58884215	229	58884058	11	11.2253	7.29575	6.23584	peak446
chr1	157071533	157071664	132	157071576	8	11.1344	7.22199	6.14588	peak447
chr12	55414151	55414312	162	55414223	8	11.1344	7.22199	6.14588	peak448
chr2	167938911	167939081	171	167938986	8	11.1344	7.22199	6.14588	peak449
chr14	76956138	76956270	133	76956185	8	11.0447	7.18818	6.05848	peak450
chr6	47785653	47785794	142	47785708	16	10.9683	6.08356	5.98317	peak451
chr13	14722697	14722854	158	14722760	8	10.9571	7.15468	5.97215	peak452
chr15	97652269	97652397	129	97652325	8	10.9571	7.15468	5.97215	peak453
chr18	35278384	35278497	114	35278447	8	10.9571	7.15468	5.97215	peak454
chr2	18314339	18314483	145	18314400	8	10.9571	7.15468	5.97215	peak455
chr2	75425765	75425909	145	75425818	8	10.9571	7.15468	5.97215	peak456
chr11	106650189	106650309	121	106650241	8	10.8716	7.1215	5.88809	peak457
chr14	65993740	65993881	142	65993810	8	10.8716	7.1215	5.88809	peak458
chr15	99868970	99869245	276	99869158	10	10.8658	7.20103	5.88333	peak459
chr3	62262281	62262419	139	62262339	8	10.788	7.08862	5.80721	peak460
chr2	143741213	143741418	206	143741284	8	10.7062	7.05604	5.72631	peak461
chr8	87513776	87513904	129	87513845	8	10.6262	7.02376	5.6475	peak462
chr15	9000710	9000906	197	9000754	9	10.5902	7.09057	5.61264	peak463
chr2	77010009	77010180	172	77010099	9	10.5902	7.09057	5.61264	peak464
chr4	140258539	140258636	98	140258602	9	10.5902	7.09057	5.61264	peak465
chr5	140267471	140267619	149	140267548	9	10.5902	7.09057	5.61264	peak466
chr8	97501125	97501281	157	97501194	9	10.5902	7.09057	5.61264	peak467
chr13	74075247	74075389	143	74075305	8	10.5479	6.99178	5.57791	peak468
chr1	84835842	84835994	153	84835890	8	10.4712	6.96008	5.50175	peak469
chr10	126725790	126725945	156	126725856	8	10.4712	6.96008	5.50175	peak470
chr11	69747758	69747870	113	69747825	8	10.4712	6.96008	5.50175	peak471
chr11	70460368	70460589	222	70460447	8	10.4712	6.96008	5.50175	peak472
chr11	115310447	115310566	120	115310494	8	10.4712	6.96008	5.50175	peak473
chr13	32943047	32943154	108	32943118	8	10.4712	6.96008	5.50175	peak474
chr13	58389287	58389495	209	58389410	8	10.4712	6.96008	5.50175	peak475
chr14	56386772	56386945	174	56386828	8	10.4712	6.96008	5.50175	peak476
chr17	57386757	57386892	136	57386836	8	10.4712	6.96008	5.50175	peak477
chr19	40662959	40663095	137	40663032	8	10.4712	6.96008	5.50175	peak478
chr2	92680293	92680432	140	92680358	8	10.4712	6.96008	5.50175	peak479
chr2	127451565	127451734	170	127451655	8	10.4712	6.96008	5.50175	peak480
chr3	33041771	33041980	210	33041902	8	10.4712	6.96008	5.50175	peak481
chr3	107967771	107967896	126	107967812	8	10.4712	6.96008	5.50175	peak482
chr3	127743441	127743553	113	127743510	8	10.4712	6.96008	5.50175	peak483
chr4	45985597	45985752	156	45985678	8	10.4712	6.96008	5.50175	peak484
chr4	130964640	130964765	126	130964691	8	10.4712	6.96008	5.50175	peak485
chr4	138407537	138407672	136	138407609	8	10.4712	6.96008	5.50175	peak486
chr5	34124881	34125073	193	34124974	8	10.4712	6.96008	5.50175	peak487
chr5	124328217	124328314	98	124328263	8	10.4712	6.96008	5.50175	peak488
chr7	126937709	126937833	125	126937774	8	10.4712	6.96008	5.50175	peak489
chr9	40614617	40614743	127	40614700	8	10.4712	6.96008	5.50175	peak490
chr9	63775462	63775661	200	63775556	8	10.4712	6.96008	5.50175	peak491
chr8	37612297	37612453	157	37612368	8	10.3961	6.92867	5.44304	peak492
chr17	35951600	35951754	155	35951691	13	10.3344	6.37442	5.38401	peak493
chr19	10463420	10463595	176	10463489	13	10.3344	6.37442	5.38401	peak494
chr2	30548877	30549013	137	30548951	13	10.3344	6.37442	5.38401	peak495
chr6	122441670	122441862	193	122441767	13	10.3344	6.37442	5.38401	peak496
chr6	72166760	72166929	170	72166845	8	10.3224	6.89755	5.37476	peak497
chr10	98569469	98569629	161	98569550	10	10.294	6.88301	5.34684	peak498
chr11	77991023	77991126	104	77991082	10	10.294	6.88301	5.34684	peak499
chr12	109924287	109924462	176	109924346	10	10.294	6.88301	5.34684	peak500
chr13	112592674	112592813	140	112592752	10	10.294	6.88301	5.34684	peak501
chr14	65977242	65977429	188	65977336	10	10.294	6.88301	5.34684	peak502
chr15	12754515	12754633	119	12754563	10	10.294	6.88301	5.34684	peak503
chr18	32537666	32537784	119	32537737	10	10.294	6.88301	5.34684	peak504
chr19	6341127	6341267	141	6341195	10	10.294	6.88301	5.34684	peak505
chr2	164859948	164860088	141	164860009	10	10.294	6.88301	5.34684	peak506
chr2	173079560	173079700	141	173079631	10	10.294	6.88301	5.34684	peak507
chr3	41378833	41378974	142	41378882	10	10.294	6.88301	5.34684	peak508
chr3	88894743	88894905	163	88894825	10	10.294	6.88301	5.34684	peak509
chr5	141180877	141181017	141	141180941	10	10.294	6.88301	5.34684	peak510
chr6	124612801	124612917	117	124612857	10	10.294	6.88301	5.34684	peak511
chr9	63684792	63685095	304	63685045	10	10.294	6.88301	5.34684	peak512
chr5	125561877	125562062	186	125561937	8	10.1795	6.83613	5.255	peak513
chr8	129120145	129120247	103	129120207	8	10.1795	6.83613	5.255	peak514
chr11	32122352	32122469	118	32122389	9	10.0334	6.80763	5.11098	peak515
chr17	46620830	46620948	119	46620875	9	10.0334	6.80763	5.11098	peak516
chr19	46576220	46576327	108	46576270	9	10.0334	6.80763	5.11098	peak517
chr18	36446367	36446490	124	36446430	8	9.97503	6.74602	5.0557	peak518
chr1	34062666	34062771	106	34062753	7	9.93169	6.55064	5.01382	peak519
chr1	58766457	58766558	102	58766508	7	9.93169	6.55064	5.01382	peak520
chr1	58801600	58801723	124	58801655	7	9.93169	6.55064	5.01382	peak521
chr1	89174790	89174897	108	89174869	7	9.93169	6.55064	5.01382	peak522
chr1	97210428	97210582	155	97210506	7	9.93169	6.55064	5.01382	peak523
chr1	173224775	173224893	119	173224828	7	9.93169	6.55064	5.01382	peak524
chr1	174458937	174459065	129	174458976	7	9.93169	6.55064	5.01382	peak525
chr10	82258231	82258357	127	82258278	7	9.90891	6.54265	5.01382	peak526
chr10	116646736	116646847	112	116646795	7	9.93169	6.55064	5.01382	peak527
chr10	122349941	122350038	98	122349968	7	9.93169	6.55064	5.01382	peak528
chr11	97670371	97670489	119	97670436	7	9.93169	6.55064	5.01382	peak529
chr11	116447089	116447243	155	116447179	7	9.93169	6.55064	5.01382	peak530
chr11	120637519	120637639	121	120637587	7	9.93169	6.55064	5.01382	peak531
chr12	20927002	20927114	113	20927055	7	9.93169	6.55064	5.01382	peak532
chr12	21117564	21117683	120	21117634	7	9.93169	6.55064	5.01382	peak533
chr12	103196516	103196624	109	103196568	7	9.93169	6.55064	5.01382	peak534
chr13	31670352	31670482	131	31670421	7	9.93169	6.55064	5.01382	peak535
chr13	41431664	41431762	99	41431695	7	9.93169	6.55064	5.01382	peak536
chr13	45126357	45126465	109	45126402	7	9.93169	6.55064	5.01382	peak537
chr13	45184467	45184589	123	45184562	7	9.93169	6.55064	5.01382	peak538
chr13	102403293	102403403	111	102403321	7	9.93169	6.55064	5.01382	peak539
chr14	48625700	48625804	105	48625765	7	9.93169	6.55064	5.01382	peak540
chr14	121891618	121891787	170	121891715	7	9.93169	6.55064	5.01382	peak541
chr15	73613026	73613137	112	73613093	7	9.93169	6.55064	5.01382	peak542
chr15	74615344	74615513	170	74615422	7	9.93169	6.55064	5.01382	peak543
chr15	85690206	85690351	146	85690268	7	9.93169	6.55064	5.01382	peak544
chr15	98840709	98840825	117	98840755	7	9.93169	6.55064	5.01382	peak545
chr15	101098179	101098304	126	101098229	7	9.93169	6.55064	5.01382	peak546
chr16	22395281	22395401	121	22395338	7	9.93169	6.55064	5.01382	peak547
chr16	94449406	94449508	103	94449450	7	9.93169	6.55064	5.01382	peak548
chr17	6947523	6947649	127	6947566	7	9.93169	6.55064	5.01382	peak549
chr17	8476249	8476431	183	8476326	7	9.93169	6.55064	5.01382	peak550
chr17	8701329	8701455	127	8701370	7	9.93169	6.55064	5.01382	peak551
chr17	29067712	29067891	180	29067794	7	9.93169	6.55064	5.01382	peak552
chr17	35196437	35196544	108	35196500	7	9.93169	6.55064	5.01382	peak553
chr17	47578637	47578829	193	47578773	7	9.93169	6.55064	5.01382	peak554
chr17	71508662	71508804	143	71508725	7	9.93169	6.55064	5.01382	peak555
chr17	79281806	79281923	118	79281866	7	9.93169	6.55064	5.01382	peak556
chr18	31948615	31948881	267	31948760	7	9.93169	6.55064	5.01382	peak557
chr18	34532963	34533060	98	34533001	7	9.93169	6.55064	5.01382	peak558
chr18	36101770	36101891	122	36101804	7	9.93169	6.55064	5.01382	peak559
chr18	70580156	70580273	118	70580179	7	9.93169	6.55064	5.01382	peak560
chr19	3414274	3414387	114	3414337	7	9.93169	6.55064	5.01382	peak561
chr19	5016570	5016694	125	5016623	7	9.93169	6.55064	5.01382	peak562
chr19	5812181	5812284	104	5812241	7	9.93169	6.55064	5.01382	peak563
chr19	43459252	43459432	181	43459342	7	9.93169	6.55064	5.01382	peak564
chr19	44912473	44912592	120	44912524	7	9.93169	6.55064	5.01382	peak565
chr19	47566489	47566647	159	47566561	7	9.93169	6.55064	5.01382	peak566
chr2	25949616	25949740	125	25949669	7	9.93169	6.55064	5.01382	peak567
chr2	35547057	35547184	128	35547143	7	9.93169	6.55064	5.01382	peak568
chr2	35547299	35547428	130	35547358	7	9.90891	6.54265	5.01382	peak569
chr2	118312808	118312917	110	118312843	7	9.93169	6.55064	5.01382	peak570
chr2	127095718	127095824	107	127095772	7	9.93169	6.55064	5.01382	peak571
chr3	83959423	83959702	280	83959567	7	9.93169	6.55064	5.01382	peak572
chr3	127328292	127328418	127	127328356	8	9.90934	6.71651	5.01382	peak573
chr4	58587407	58587537	131	58587469	7	9.93169	6.55064	5.01382	peak574
chr4	62095459	62095567	109	62095517	7	9.93169	6.55064	5.01382	peak575
chr4	104785064	104785162	99	104785102	7	9.93169	6.55064	5.01382	peak576
chr4	124805277	124805432	156	124805342	7	9.93169	6.55064	5.01382	peak577
chr4	129372866	129372977	112	129372897	7	9.93169	6.55064	5.01382	peak578
chr5	23606807	23606912	106	23606875	7	9.93169	6.55064	5.01382	peak579
chr5	32000111	32000395	285	32000244	7	9.93169	6.55064	5.01382	peak580
chr5	36131465	36131666	202	36131554	7	9.93169	6.55064	5.01382	peak581
chr5	66154530	66154684	155	66154617	7	9.93169	6.55064	5.01382	peak582
chr5	66155658	66155783	126	66155739	7	9.93169	6.55064	5.01382	peak583
chr5	66650974	66651089	116	66651021	7	9.93169	6.55064	5.01382	peak584
chr5	74829129	74829259	131	74829186	7	9.93169	6.55064	5.01382	peak585
chr5	111265162	111265292	131	111265254	7	9.93169	6.55064	5.01382	peak586
chr5	113986862	113986987	126	113986933	7	9.93169	6.55064	5.01382	peak587
chr5	114453830	114453936	107	114453874	7	9.93169	6.55064	5.01382	peak588
chr5	122764968	122765134	167	122765049	7	9.90891	6.54265	5.01382	peak589
chr5	123582847	123583007	161	123582925	7	9.93169	6.55064	5.01382	peak590
chr5	125444930	125445051	122	125445007	7	9.93169	6.55064	5.01382	peak591
chr6	29418206	29418488	283	29418255	7	9.93169	6.55064	5.01382	peak592
chr6	71372220	71372334	115	71372269	7	9.93169	6.55064	5.01382	peak593
chr6	87175240	87175471	232	87175337	7	9.93169	6.55064	5.01382	peak594
chr6	117739050	117739178	129	117739093	7	9.93169	6.55064	5.01382	peak595
chr6	119382012	119382121	110	119382058	7	9.93169	6.55064	5.01382	peak596
chr6	125968546	125968661	116	125968592	7	9.93169	6.55064	5.01382	peak597
chr6	146836951	146837067	117	146837022	7	9.93169	6.55064	5.01382	peak598
chr7	25494605	25494755	151	25494673	7	9.93169	6.55064	5.01382	peak599
chr7	29747454	29747584	131	29747533	7	9.93169	6.55064	5.01382	peak600
chr7	31318133	31318274	142	31318198	7	9.93169	6.55064	5.01382	peak601
chr7	35929030	35929159	130	35929104	7	9.93169	6.55064	5.01382	peak602
chr7	88219583	88219711	129	88219641	7	9.93169	6.55064	5.01382	peak603
chr7	111392882	111393051	170	111392960	7	9.93169	6.55064	5.01382	peak604
chr7	112885019	112885218	200	112885112	7	9.93169	6.55064	5.01382	peak605
chr7	118225840	118225945	106	118225872	7	9.93169	6.55064	5.01382	peak606
chr7	130886422	130886537	116	130886496	7	9.93169	6.55064	5.01382	peak607
chr7	140951666	140951805	140	140951730	7	9.93169	6.55064	5.01382	peak608
chr7	147136191	147136316	126	147136278	7	9.90891	6.54265	5.01382	peak609
chr8	4193452	4193562	111	4193487	7	9.93169	6.55064	5.01382	peak610
chr8	24145823	24145941	119	24145908	7	9.93169	6.55064	5.01382	peak611
chr8	32321953	32322130	178	32322007	7	9.93169	6.55064	5.01382	peak612
chr8	80073436	80073679	244	80073490	7	9.93169	6.55064	5.01382	peak613
chr8	112261624	112261824	201	112261748	7	9.93169	6.55064	5.01382	peak614
chr9	21420094	21420223	130	21420157	7	9.93169	6.55064	5.01382	peak615
chr9	35168399	35168567	169	35168490	7	9.93169	6.55064	5.01382	peak616
chr9	45206388	45206498	111	45206456	7	9.93169	6.55064	5.01382	peak617
chr9	50960533	50960644	112	50960589	7	9.93169	6.55064	5.01382	peak618
chr9	65478291	65478404	114	65478326	7	9.93169	6.55064	5.01382	peak619
chr9	65908197	65908312	116	65908241	7	9.93169	6.55064	5.01382	peak620
chr9	104078325	104078454	130	104078387	7	9.93169	6.55064	5.01382	peak621
chr9	108410085	108410278	194	108410206	7	9.93169	6.55064	5.01382	peak622
chr9	113946612	113946722	111	113946662	7	9.93169	6.55064	5.01382	peak623
chr9	114436425	114436531	107	114436482	7	9.93169	6.55064	5.01382	peak624
chrX	39421110	39421256	147	39421190	7	9.93169	6.55064	5.01382	peak625
chrX	49034728	49034857	130	49034788	7	9.93169	6.55064	5.01382	peak626
chrX	73054644	73054759	116	73054729	7	9.93169	6.55064	5.01382	peak627
chr13	96294231	96294357	127	96294292	7	9.82092	6.51143	4.973	peak628
chr2	131002333	131002444	112	131002402	7	9.82092	6.51143	4.973	peak629
chr5	110819788	110819914	127	110819849	7	9.82092	6.51143	4.973	peak630
chr10	61649734	61649858	125	61649771	8	9.78139	6.65825	4.93642	peak631
chr10	81033671	81033809	139	81033746	8	9.78139	6.65825	4.93642	peak632
chr11	5916491	5916606	116	5916556	8	9.78139	6.65825	4.93642	peak633
chr13	59924657	59924774	118	59924689	8	9.78139	6.65825	4.93642	peak634
chr15	75899459	75899619	161	75899537	8	9.78139	6.65825	4.93642	peak635
chr15	97923750	97923886	137	97923804	8	9.78139	6.65825	4.93642	peak636
chr15	98865886	98866014	129	98865972	8	9.78139	6.65825	4.93642	peak637
chr16	95869610	95869711	102	95869658	8	9.78139	6.65825	4.93642	peak638
chr17	10512733	10513095	363	10512909	8	9.78139	6.65825	4.93642	peak639
chr2	35516992	35517102	111	35517024	8	9.78139	6.65825	4.93642	peak640
chr2	158894557	158894689	133	158894620	8	9.78139	6.65825	4.93642	peak641
chr3	97568237	97568367	131	97568305	8	9.78139	6.65825	4.93642	peak642
chr5	145874961	145875136	176	145875053	8	9.78139	6.65825	4.93642	peak643
chr5	149211342	149211455	114	149211382	8	9.78139	6.65825	4.93642	peak644
chr6	90666387	90666492	106	90666448	8	9.78139	6.65825	4.93642	peak645
chr8	23918349	23918487	139	23918413	8	9.78139	6.65825	4.93642	peak646
chr1	91543340	91543473	134	91543414	7	9.73521	6.48051	4.90051	peak647
chr1	92547478	92547645	168	92547555	7	9.73521	6.48051	4.90051	peak648
chr1	107255739	107255841	103	107255813	7	9.73521	6.48051	4.90051	peak649
chr1	133081275	133081377	103	133081338	7	9.73521	6.48051	4.90051	peak650
chr1	153018834	153018963	130	153018898	7	9.73521	6.48051	4.90051	peak651
chr10	61512724	61512823	100	61512786	7	9.73521	6.48051	4.90051	peak652
chr10	88289475	88289592	118	88289547	7	9.73521	6.48051	4.90051	peak653
chr11	34055362	34055496	135	34055439	7	9.73521	6.48051	4.90051	peak654
chr11	69715407	69715519	113	69715446	7	9.73521	6.48051	4.90051	peak655
chr11	75736343	75736488	146	75736399	7	9.73521	6.48051	4.90051	peak656
chr11	76391490	76391595	106	76391541	7	9.73521	6.48051	4.90051	peak657
chr13	85329040	85329141	102	85329113	7	9.73521	6.48051	4.90051	peak658
chr14	35763703	35763805	103	35763778	7	9.73521	6.48051	4.90051	peak659
chr16	11063437	11063583	147	11063522	7	9.73521	6.48051	4.90051	peak660
chr16	32551706	32551825	120	32551781	7	9.73521	6.48051	4.90051	peak661
chr16	76332495	76332603	109	76332565	7	9.73521	6.48051	4.90051	peak662
chr17	6986463	6986597	135	6986511	7	9.73521	6.48051	4.90051	peak663
chr18	82737220	82737320	101	82737271	7	9.73521	6.48051	4.90051	peak664
chr19	5567567	5567714	148	5567630	7	9.73521	6.48051	4.90051	peak665
chr19	22991205	22991360	156	22991282	7	9.73521	6.48051	4.90051	peak666
chr2	6390294	6390451	158	6390373	7	9.73521	6.48051	4.90051	peak667
chr2	29459617	29459719	103	29459672	7	9.73521	6.48051	4.90051	peak668
chr2	30613961	30614078	118	30613996	7	9.73521	6.48051	4.90051	peak669
chr2	68010705	68010821	117	68010757	7	9.73521	6.48051	4.90051	peak670
chr2	96989013	96989142	130	96989106	7	9.73521	6.48051	4.90051	peak671
chr3	107499286	107499494	209	107499379	7	9.73521	6.48051	4.90051	peak672
chr3	127521730	127521860	131	127521792	7	9.73521	6.48051	4.90051	peak673
chr4	137400749	137400859	111	137400818	7	9.73521	6.48051	4.90051	peak674
chr4	140694613	140694716	104	140694647	7	9.73521	6.48051	4.90051	peak675
chr5	65014998	65015111	114	65015034	7	9.73521	6.48051	4.90051	peak676
chr6	19071595	19071696	102	19071631	7	9.73521	6.48051	4.90051	peak677
chr6	124706234	124706351	118	124706274	7	9.73521	6.48051	4.90051	peak678
chr7	63305536	63305660	125	63305605	7	9.73521	6.48051	4.90051	peak679
chr7	88907379	88907495	117	88907429	7	9.73521	6.48051	4.90051	peak680
chr7	96275138	96275239	102	96275185	7	9.73521	6.48051	4.90051	peak681
chr7	105883470	105883626	157	105883533	7	9.73521	6.48051	4.90051	peak682
chr8	113569575	113569697	123	113569637	7	9.73521	6.48051	4.90051	peak683
chr8	125897860	125897994	135	125897900	7	9.73521	6.48051	4.90051	peak684
chr8	128444803	128444907	105	128444855	7	9.73521	6.48051	4.90051	peak685
chr9	42752278	42752463	186	42752356	7	9.73521	6.48051	4.90051	peak686
chrX	165111754	165111923	170	165111842	7	9.73521	6.48051	4.90051	peak687
chrX	166317399	166317513	115	166317449	7	9.73521	6.48051	4.90051	peak688
chr1	135058302	135058418	117	135058338	7	9.65168	6.44988	4.84233	peak689
chr12	111723907	111724039	133	111723952	7	9.65168	6.44988	4.84233	peak690
chr14	75310093	75310271	179	75310165	7	9.65168	6.44988	4.84233	peak691
chr16	12900825	12900977	153	12900888	7	9.65168	6.44988	4.84233	peak692
chr17	21704081	21704251	171	21704163	7	9.65168	6.44988	4.84233	peak693
chr17	47648237	47648500	264	47648421	7	9.65168	6.44988	4.84233	peak694
chr18	53320689	53320806	118	53320765	7	9.65168	6.44988	4.84233	peak695
chr3	27589196	27589313	118	27589243	7	9.65168	6.44988	4.84233	peak696
chr3	101311758	101311883	126	101311805	7	9.65168	6.44988	4.84233	peak697
chr4	94720549	94720670	122	94720618	7	9.65168	6.44988	4.84233	peak698
chr5	113893838	113893961	124	113893881	7	9.65168	6.44988	4.84233	peak699
chr5	146041294	146041415	122	146041361	7	9.65168	6.44988	4.84233	peak700
chr7	86418119	86418246	128	86418198	7	9.65168	6.44988	4.84233	peak701
chr8	129348820	129348926	107	129348866	7	9.65168	6.44988	4.84233	peak702
chr9	35112795	35113096	302	35112998	174	9.65102	1.65603	4.84233	peak703
chr1	153009385	153009545	161	153009458	7	9.57021	6.41955	4.76423	peak704
chr11	11729326	11729464	139	11729394	7	9.57021	6.41955	4.76423	peak705
chr11	121282518	121282666	149	121282579	7	9.57021	6.41955	4.76423	peak706
chr13	104768151	104768248	98	104768195	7	9.57021	6.41955	4.76423	peak707
chr19	10764859	10764982	124	10764936	7	9.57021	6.41955	4.76423	peak708
chr3	121375438	121375561	124	121375513	7	9.57021	6.41955	4.76423	peak709
chr8	119857963	119858116	154	119858050	7	9.57021	6.41955	4.76423	peak710
chr4	23910354	23910510	157	23910433	9	9.54492	6.54639	4.74401	peak711
chr1	74996394	74996507	114	74996461	7	9.49071	6.38949	4.69202	peak712
chr1	90598666	90598814	149	90598748	7	9.49071	6.38949	4.69202	peak713
chr7	148518067	148518169	103	148518091	7	9.49071	6.38949	4.69202	peak714
chr8	81923277	81923496	220	81923345	7	9.49071	6.38949	4.69202	peak715
chr1	159385189	159385382	194	159385259	7	9.41309	6.35972	4.61621	peak716
chr11	51449377	51449632	256	51449496	7	9.41309	6.35972	4.61621	peak717
chr13	43085025	43085134	110	43085077	7	9.41309	6.35972	4.61621	peak718
chr17	37187563	37187693	131	37187618	7	9.41309	6.35972	4.61621	peak719
chr4	135050066	135050163	98	135050095	7	9.41309	6.35972	4.61621	peak720
chr5	23893234	23893338	105	23893270	7	9.41309	6.35972	4.61621	peak721
chr9	102628692	102628838	147	102628728	7	9.41309	6.35972	4.61621	peak722
chr1	172408730	172408838	109	172408778	7	9.33727	6.33022	4.54397	peak723
chr11	98308120	98308250	131	98308183	7	9.33727	6.33022	4.54397	peak724
chr2	17986248	17986417	170	17986325	7	9.33727	6.33022	4.54397	peak725
chr9	121283796	121283929	134	121283882	7	9.33727	6.33022	4.54397	peak726
chr5	114623061	114623226	166	114623141	18	9.27454	4.76108	4.48259	peak727
chr19	4310026	4310145	120	4310086	7	9.26317	6.30099	4.47171	peak728
chr3	95087402	95087502	101	95087437	7	9.26317	6.30099	4.47171	peak729
chr8	27462681	27462810	130	27462744	7	9.26317	6.30099	4.47171	peak730
chr8	93432225	93432327	103	93432285	12	9.26345	5.9191	4.47171	peak731
chr9	110651026	110651185	160	110651110	12	9.26345	5.9191	4.47171	peak732
chr1	180336601	180336700	100	180336636	10	9.20207	6.2428	4.41429	peak733
chr1	90371247	90371378	132	90371332	8	9.2017	6.38152	4.41395	peak734
chr15	89186955	89187057	103	89187005	8	9.2017	6.38152	4.41395	peak735
chr17	25097545	25097649	105	25097575	8	9.2017	6.38152	4.41395	peak736
chr18	36943082	36943205	124	36943146	8	9.2017	6.38152	4.41395	peak737
chr2	35688386	35688526	141	35688438	8	9.2017	6.38152	4.41395	peak738
chr8	113494406	113494522	117	113494450	8	9.2017	6.38152	4.41395	peak739
chr13	103747907	103748012	106	103747952	7	9.1907	6.27204	4.40645	peak740
chr3	108003631	108003759	129	108003669	7	9.11981	6.24334	4.33667	peak741
chr6	134870190	134870399	210	134870237	7	9.11981	6.24334	4.33667	peak742
chr11	54600696	54600805	110	54600746	9	9.11038	6.30447	4.32838	peak743
chr16	35110877	35110978	102	35110905	9	9.11038	6.30447	4.32838	peak744
chr2	26300682	26300836	155	26300740	7	9.05043	6.21491	4.26932	peak745
chr2	74542011	74542166	156	74542084	14	9.03569	5.36785	4.25512	peak746
chr1	23262800	23262995	196	23262873	9	9.02734	6.25728	4.24707	peak747
chr1	40817025	40817153	129	40817079	9	9.02734	6.25728	4.24707	peak748
chr1	52290380	52290514	135	52290447	9	9.02734	6.25728	4.24707	peak749
chr1	137715156	137715274	119	137715209	9	9.02734	6.25728	4.24707	peak750
chr10	81027062	81027200	139	81027125	9	9.02734	6.25728	4.24707	peak751
chr11	20855722	20855895	174	20855819	9	9.02734	6.25728	4.24707	peak752
chr11	22908400	22908527	128	22908481	9	9.02734	6.25728	4.24707	peak753
chr11	49578167	49578346	180	49578260	9	9.02734	6.25728	4.24707	peak754
chr11	69231039	69231201	163	69231129	9	9.02734	6.25728	4.24707	peak755
chr11	88107262	88107389	128	88107315	9	9.02734	6.25728	4.24707	peak756
chr11	96790121	96790238	118	96790183	9	9.02734	6.25728	4.24707	peak757
chr12	25817084	25817209	126	25817155	9	9.02734	6.25728	4.24707	peak758
chr12	88205390	88205536	147	88205470	9	9.02734	6.25728	4.24707	peak759
chr14	34164317	34164495	179	34164404	9	9.02734	6.25728	4.24707	peak760
chr14	41780496	41780640	145	41780553	9	9.02734	6.25728	4.24707	peak761
chr14	75347669	75347820	152	75347746	9	9.02734	6.25728	4.24707	peak762
chr15	86219475	86219582	108	86219538	9	9.02734	6.25728	4.24707	peak763
chr15	88706126	88706444	319	88706216	9	9.02734	6.25728	4.24707	peak764
chr16	32877691	32877822	132	32877727	9	9.02734	6.25728	4.24707	peak765
chr16	92369755	92369878	124	92369827	9	9.02734	6.25728	4.24707	peak766
chr17	72952648	72952764	117	72952708	9	9.02734	6.25728	4.24707	peak767
chr17	88037597	88037726	130	88037659	9	9.02734	6.25728	4.24707	peak768
chr18	32996843	32996950	108	32996891	9	9.02734	6.25728	4.24707	peak769
chr18	75745677	75745864	188	75745770	9	9.02734	6.25728	4.24707	peak770
chr19	36811230	36811371	142	36811289	9	9.02734	6.25728	4.24707	peak771
chr19	57732089	57732201	113	57732145	9	9.02734	6.25728	4.24707	peak772
chr2	25041991	25042093	103	25042036	9	9.02734	6.25728	4.24707	peak773
chr2	32263996	32264260	265	32264036	9	9.02734	6.25728	4.24707	peak774
chr2	152533457	152533593	137	152533547	9	9.02734	6.25728	4.24707	peak775
chr2	181413651	181413820	170	181413731	9	9.02734	6.25728	4.24707	peak776
chr4	33070236	33070384	149	33070305	9	9.02734	6.25728	4.24707	peak777
chr4	117222921	117223046	126	117223006	9	9.02734	6.25728	4.24707	peak778
chr4	122916878	122917034	157	122916961	9	9.02734	6.25728	4.24707	peak779
chr4	138010021	138010143	123	138010071	9	9.02734	6.25728	4.24707	peak780
chr4	150120353	150120528	176	150120437	9	9.02734	6.25728	4.24707	peak781
chr5	119010730	119010894	165	119010802	9	9.02734	6.25728	4.24707	peak782
chr6	50059961	50060071	111	50060032	9	9.02734	6.25728	4.24707	peak783
chr6	97098875	97099027	153	97098916	9	9.02734	6.25728	4.24707	peak784
chr6	114918984	114919083	100	114919039	9	9.02734	6.25728	4.24707	peak785
chr6	140372454	140372588	135	140372539	9	9.02734	6.25728	4.24707	peak786
chr7	17199694	17199832	139	17199757	9	9.02734	6.25728	4.24707	peak787
chr7	77934362	77934478	117	77934419	9	9.02734	6.25728	4.24707	peak788
chr7	121961202	121961330	129	121961284	9	9.02734	6.25728	4.24707	peak789
chr7	125848950	125849311	362	125849272	9	9.02734	6.25728	4.24707	peak790
chr7	140307671	140307770	100	140307748	9	9.02734	6.25728	4.24707	peak791
chr9	66906407	66906572	166	66906480	9	9.02734	6.25728	4.24707	peak792
chr1	36587343	36587458	116	36587414	7	8.98249	6.18674	4.2248	peak793
chr1	122859463	122859566	104	122859491	7	8.98249	6.18674	4.2248	peak794
chr10	99950122	99950242	121	99950185	7	8.98249	6.18674	4.2248	peak795
chr10	127931218	127931318	101	127931255	7	8.98249	6.18674	4.2248	peak796
chr11	68505352	68505494	143	68505408	7	8.98249	6.18674	4.2248	peak797
chr11	102080165	102080325	161	102080256	7	8.98249	6.18674	4.2248	peak798
chr13	18809160	18809302	143	18809237	7	8.98249	6.18674	4.2248	peak799
chr15	72891464	72891565	102	72891515	7	8.98249	6.18674	4.2248	peak800
chr15	85725751	85725857	107	85725821	7	8.98249	6.18674	4.2248	peak801
chr15	93541768	93541920	153	93541851	7	8.98249	6.18674	4.2248	peak802
chr15	100592265	100592369	105	100592301	7	8.98249	6.18674	4.2248	peak803
chr15	102917248	102917369	122	102917319	7	8.98249	6.18674	4.2248	peak804
chr16	18876621	18876739	119	18876687	7	8.98249	6.18674	4.2248	peak805
chr17	56565092	56565199	108	56565127	7	8.98249	6.18674	4.2248	peak806
chr17	66234633	66234741	109	66234701	7	8.98249	6.18674	4.2248	peak807
chr17	80319363	80319581	219	80319504	7	8.98249	6.18674	4.2248	peak808
chr18	15147056	15147175	120	15147104	7	8.98249	6.18674	4.2248	peak809
chr18	44821737	44822031	295	44821825	7	8.98249	6.18674	4.2248	peak810
chr18	73782909	73783018	110	73782937	7	8.98249	6.18674	4.2248	peak811
chr2	34817037	34817192	156	34817115	7	8.98249	6.18674	4.2248	peak812
chr3	68625937	68626044	108	68625975	7	8.98249	6.18674	4.2248	peak813
chr3	101471305	101471466	162	101471425	7	8.98249	6.18674	4.2248	peak814
chr3	101616650	101616791	142	101616720	7	8.98249	6.18674	4.2248	peak815
chr3	142058532	142058643	112	142058589	7	8.98249	6.18674	4.2248	peak816
chr4	99681083	99681255	173	99681178	7	8.98249	6.18674	4.2248	peak817
chr4	137392151	137392253	103	137392173	7	8.98249	6.18674	4.2248	peak818
chr4	150978683	150978848	166	150978754	7	8.98249	6.18674	4.2248	peak819
chr4	154360406	154360541	136	154360470	7	8.98249	6.18674	4.2248	peak820
chr5	74245307	74245435	129	74245391	7	8.98249	6.18674	4.2248	peak821
chr5	114423018	114423127	110	114423059	7	8.98249	6.18674	4.2248	peak822
chr6	29867531	29867628	98	29867571	7	8.98249	6.18674	4.2248	peak823
chr7	88005980	88006095	116	88006050	7	8.98249	6.18674	4.2248	peak824
chr7	148317012	148317162	151	148317106	7	8.98249	6.18674	4.2248	peak825
chr8	35126388	35126508	121	35126450	7	8.98249	6.18674	4.2248	peak826
chr8	108927240	108927417	178	108927335	7	8.98249	6.18674	4.2248	peak827
chr12	112906696	112906813	118	112906767	7	8.91595	6.15882	4.17733	peak828
chr8	107694309	107694446	138	107694387	7	8.91595	6.15882	4.17733	peak829
chr5	76732911	76733008	98	76732944	10	8.87125	6.04181	4.13398	peak830
chr14	20571600	20571697	98	20571638	7	8.85074	6.13115	4.11355	peak831
chr16	31460172	31460399	228	31460267	7	8.85074	6.13115	4.11355	peak832
chr18	80904287	80904459	173	80904383	7	8.85074	6.13115	4.11355	peak833
chr19	55341338	55341479	142	55341409	7	8.85074	6.13115	4.11355	peak834
chr8	87118412	87118549	138	87118466	7	8.85074	6.13115	4.11355	peak835
chr4	154518396	154518520	125	154518463	9	8.71949	6.07979	3.98481	peak836
chr9	3000039	3000236	198	3000113	148	8.71507	1.67554	3.98108	peak837
chr1	120950170	120950280	111	120950233	8	8.70259	6.12686	3.96863	peak838
chr15	78928219	78928365	147	78928295	8	8.70259	6.12686	3.96863	peak839
chr8	125566488	125566622	135	125566536	8	8.70259	6.12686	3.96863	peak840
chr2	98507142	98507464	323	98507269	161	8.65086	1.6348	3.92053	peak841
chr2	98506631	98506868	238	98506815	131	8.63454	1.72853	3.90445	peak842
chr1	193007231	193007338	108	193007289	7	8.60228	6.02292	3.87228	peak843
chr2	98502777	98503114	338	98502857	152	8.55223	1.65378	3.82229	peak844
chr1	7388395	7388492	98	7388462	6	8.37213	5.73181	3.64332	peak845
chr1	24620589	24620784	196	24620636	36	8.29678	2.85538	3.64332	peak846
chr1	36568706	36568807	102	36568750	6	8.37213	5.73181	3.64332	peak847
chr1	39425350	39425460	111	39425414	6	8.37213	5.73181	3.64332	peak848
chr1	40323583	40323743	161	40323647	8	8.26503	5.89175	3.64332	peak849
chr1	46266982	46267091	110	46267027	6	8.37213	5.73181	3.64332	peak850
chr1	52142518	52142702	185	52142608	6	8.37213	5.73181	3.64332	peak851
chr1	63612015	63612122	108	63612056	6	8.37213	5.73181	3.64332	peak852
chr1	64492752	64492853	102	64492790	6	8.37213	5.73181	3.64332	peak853
chr1	66221636	66221840	205	66221758	6	8.37213	5.73181	3.64332	peak854
chr1	69362561	69362660	100	69362628	6	8.37213	5.73181	3.64332	peak855
chr1	75385955	75386064	110	75385989	6	8.37213	5.73181	3.64332	peak856
chr1	91727545	91727649	105	91727572	6	8.37213	5.73181	3.64332	peak857
chr1	92059146	92059252	107	92059165	6	8.37213	5.73181	3.64332	peak858
chr1	93426943	93427055	113	93427003	6	8.37213	5.73181	3.64332	peak859
chr1	120400595	120400705	111	120400648	6	8.37213	5.73181	3.64332	peak860
chr1	121990253	121990354	102	121990304	6	8.37213	5.73181	3.64332	peak861
chr1	122228568	122228671	104	122228617	6	8.37213	5.73181	3.64332	peak862
chr1	130611206	130611306	101	130611280	6	8.37213	5.73181	3.64332	peak863
chr1	137145215	137145322	108	137145255	6	8.37213	5.73181	3.64332	peak864
chr1	147994598	147994704	107	147994662	6	8.37213	5.73181	3.64332	peak865
chr1	162461668	162461773	106	162461700	6	8.37213	5.73181	3.64332	peak866
chr1	167124656	167124764	109	167124678	6	8.37213	5.73181	3.64332	peak867
chr1	167717691	167717802	112	167717778	6	8.37213	5.73181	3.64332	peak868
chr1	173408185	173408297	113	173408216	6	8.37213	5.73181	3.64332	peak869
chr1	174280772	174280925	154	174280848	7	8.37159	5.91845	3.64332	peak870
chr1	174456905	174457041	137	174456976	6	8.37213	5.73181	3.64332	peak871
chr1	180118012	180118136	125	180118065	6	8.37213	5.73181	3.64332	peak872
chr1	191166914	191167024	111	191166975	6	8.37213	5.73181	3.64332	peak873
chr1	191347337	191347436	100	191347348	6	8.37213	5.73181	3.64332	peak874
chr1	192854095	192854248	154	192854162	6	8.37213	5.73181	3.64332	peak875
chr10	4795904	4796075	172	4795993	6	8.37213	5.73181	3.64332	peak876
chr10	5636415	5636519	105	5636436	6	8.37213	5.73181	3.64332	peak877
chr10	12555914	12556028	115	12555948	6	8.35226	5.72481	3.64332	peak878
chr10	19627142	19627271	130	19627209	6	8.37213	5.73181	3.64332	peak879
chr10	19868643	19868766	124	19868719	6	8.37213	5.73181	3.64332	peak880
chr10	29033001	29033129	129	29033054	6	8.37213	5.73181	3.64332	peak881
chr10	30031638	30031765	128	30031683	6	8.37213	5.73181	3.64332	peak882
chr10	43233771	43233870	100	43233816	6	8.37213	5.73181	3.64332	peak883
chr10	49739927	49740026	100	49739973	6	8.37213	5.73181	3.64332	peak884
chr10	59753590	59753796	207	59753715	6	8.37213	5.73181	3.64332	peak885
chr10	66863114	66863211	98	66863157	6	8.37213	5.73181	3.64332	peak886
chr10	67927809	67927912	104	67927866	6	8.37213	5.73181	3.64332	peak887
chr10	79896112	79896235	124	79896155	7	8.37159	5.91845	3.64332	peak888
chr10	80065838	80065956	119	80065910	6	8.37213	5.73181	3.64332	peak889
chr10	84197096	84197193	98	84197166	6	8.37213	5.73181	3.64332	peak890
chr10	107872866	107872965	100	107872899	6	8.37213	5.73181	3.64332	peak891
chr10	115083657	115083756	100	115083711	6	8.37213	5.73181	3.64332	peak892
chr11	5640801	5641029	229	5640873	6	8.37213	5.73181	3.64332	peak893
chr11	19777343	19777448	106	19777389	6	8.35226	5.72481	3.64332	peak894
chr11	45565829	45565927	99	45565846	6	8.27551	5.6975	3.64332	peak895
chr11	51502157	51502258	102	51502222	6	8.37213	5.73181	3.64332	peak896
chr11	53717872	53717973	102	53717908	6	8.37213	5.73181	3.64332	peak897
chr11	59272672	59272769	98	59272742	6	8.37213	5.73181	3.64332	peak898
chr11	59437867	59438000	134	59437922	6	8.37213	5.73181	3.64332	peak899
chr11	59919902	59920034	133	59919952	6	8.37213	5.73181	3.64332	peak900
chr11	64129542	64129648	107	64129577	7	8.37159	5.91845	3.64332	peak901
chr11	68390142	68390241	100	68390192	6	8.37213	5.73181	3.64332	peak902
chr11	68530771	68530869	99	68530801	6	8.37213	5.73181	3.64332	peak903
chr11	68769648	68769747	100	68769718	6	8.37213	5.73181	3.64332	peak904
chr11	68821773	68821873	101	68821822	6	8.37213	5.73181	3.64332	peak905
chr11	77500090	77500251	162	77500161	6	8.37213	5.73181	3.64332	peak906
chr11	79801529	79801626	98	79801585	6	8.37213	5.73181	3.64332	peak907
chr11	88725809	88725939	131	88725858	6	8.35226	5.72481	3.64332	peak908
chr11	94840505	94840654	150	94840578	6	8.37213	5.73181	3.64332	peak909
chr11	95171829	95171942	114	95171924	6	8.37213	5.73181	3.64332	peak910
chr11	95477226	95477344	119	95477259	6	8.37213	5.73181	3.64332	peak911
chr11	102485672	102485779	108	102485725	6	8.37213	5.73181	3.64332	peak912
chr11	106150865	106150965	101	106150912	6	8.37213	5.73181	3.64332	peak913
chr11	113726991	113727144	154	113727085	6	8.37213	5.73181	3.64332	peak914
chr11	115602534	115602647	114	115602580	6	8.37213	5.73181	3.64332	peak915
chr11	115836085	115836272	188	115836195	6	8.37213	5.73181	3.64332	peak916
chr11	116180424	116180526	103	116180463	6	8.37213	5.73181	3.64332	peak917
chr11	116325318	116325415	98	116325379	6	8.37213	5.73181	3.64332	peak918
chr11	120056877	120057004	128	120056922	6	8.37213	5.73181	3.64332	peak919
chr11	120215192	120215300	109	120215270	6	8.37213	5.73181	3.64332	peak920
chr11	120645476	120645575	100	120645553	6	8.37213	5.73181	3.64332	peak921
chr12	3364989	3365169	181	3365081	7	8.37159	5.91845	3.64332	peak922
chr12	4133632	4133737	106	4133680	6	8.37213	5.73181	3.64332	peak923
chr12	10230726	10230844	119	10230786	8	8.26503	5.89175	3.64332	peak924
chr12	20672974	20673071	98	20673016	6	8.37213	5.73181	3.64332	peak925
chr12	21140067	21140276	210	21140218	6	8.37213	5.73181	3.64332	peak926
chr12	25390428	25390539	112	25390479	6	8.27551	5.6975	3.64332	peak927
chr12	25646998	25647096	99	25647056	6	8.37213	5.73181	3.64332	peak928
chr12	32587016	32587154	139	32587100	6	8.37213	5.73181	3.64332	peak929
chr12	53605354	53605451	98	53605414	6	8.37213	5.73181	3.64332	peak930
chr12	75114878	75114975	98	75114911	6	8.37213	5.73181	3.64332	peak931
chr12	75365957	75366068	112	75366005	6	8.37213	5.73181	3.64332	peak932
chr12	79635624	79635728	105	79635668	6	8.37213	5.73181	3.64332	peak933
chr12	81339729	81339835	107	81339776	6	8.37213	5.73181	3.64332	peak934
chr12	86516924	86517028	105	86516961	6	8.27551	5.6975	3.64332	peak935
chr12	113352091	113352220	130	113352141	6	8.37213	5.73181	3.64332	peak936
chr13	10653386	10653509	124	10653448	6	8.37213	5.73181	3.64332	peak937
chr13	24082784	24082913	130	24082834	6	8.37213	5.73181	3.64332	peak938
chr13	25822073	25822170	98	25822097	6	8.37213	5.73181	3.64332	peak939
chr13	30305272	30305398	127	30305321	6	8.37213	5.73181	3.64332	peak940
chr13	36387906	36388069	164	36387979	6	8.37213	5.73181	3.64332	peak941
chr13	53331503	53331660	158	53331564	6	8.37213	5.73181	3.64332	peak942
chr13	58224887	58225019	133	58224954	6	8.37213	5.73181	3.64332	peak943
chr13	64018755	64018871	117	64018809	6	8.37213	5.73181	3.64332	peak944
chr13	64860250	64860365	116	64860295	6	8.37213	5.73181	3.64332	peak945
chr13	81922419	81922614	196	81922465	6	8.37213	5.73181	3.64332	peak946
chr13	90701405	90701502	98	90701476	6	8.37213	5.73181	3.64332	peak947
chr13	92048030	92048139	110	92048049	6	8.37213	5.73181	3.64332	peak948
chr13	96201594	96201698	105	96201629	6	8.37213	5.73181	3.64332	peak949
chr13	101500645	101500747	103	101500668	6	8.37213	5.73181	3.64332	peak950
chr13	104899581	104899683	103	104899611	6	8.37213	5.73181	3.64332	peak951
chr13	108621604	108621712	109	108621673	6	8.37213	5.73181	3.64332	peak952
chr14	21692648	21692747	100	21692715	6	8.37213	5.73181	3.64332	peak953
chr14	21700235	21700342	108	21700312	6	8.37213	5.73181	3.64332	peak954
chr14	23453134	23453248	115	23453179	6	8.37213	5.73181	3.64332	peak955
chr14	34089564	34089670	107	34089641	6	8.37213	5.73181	3.64332	peak956
chr14	35214508	35214616	109	35214570	6	8.37213	5.73181	3.64332	peak957
chr14	35362672	35362774	103	35362730	9	8.36462	5.87057	3.64332	peak958
chr14	55333164	55333262	99	55333216	6	8.37213	5.73181	3.64332	peak959
chr14	56464777	56464887	111	56464831	6	8.37213	5.73181	3.64332	peak960
chr14	58601051	58601150	100	58601097	6	8.37213	5.73181	3.64332	peak961
chr14	64668111	64668268	158	64668205	6	8.37213	5.73181	3.64332	peak962
chr14	79716068	79716197	130	79716138	6	8.37213	5.73181	3.64332	peak963
chr14	80265306	80265416	111	80265374	6	8.37213	5.73181	3.64332	peak964
chr14	84664523	84664649	127	84664584	6	8.37213	5.73181	3.64332	peak965
chr14	100071839	100071938	100	100071886	6	8.37213	5.73181	3.64332	peak966
chr14	120877413	120877530	118	120877440	6	8.37213	5.73181	3.64332	peak967
chr15	34608136	34608233	98	34608190	6	8.37213	5.73181	3.64332	peak968
chr15	44451107	44451206	100	44451155	6	8.37213	5.73181	3.64332	peak969
chr15	46528997	46529097	101	46529058	6	8.37213	5.73181	3.64332	peak970
chr15	50662396	50662498	103	50662435	6	8.37213	5.73181	3.64332	peak971
chr15	65629431	65629551	121	65629506	6	8.37213	5.73181	3.64332	peak972
chr15	72848317	72848419	103	72848342	6	8.37213	5.73181	3.64332	peak973
chr15	75812295	75812397	103	75812373	6	8.37213	5.73181	3.64332	peak974
chr15	77893012	77893146	135	77893052	6	8.37213	5.73181	3.64332	peak975
chr15	78034640	78034765	126	78034682	6	8.37213	5.73181	3.64332	peak976
chr15	79182996	79183099	104	79183041	6	8.37213	5.73181	3.64332	peak977
chr15	79347616	79347722	107	79347683	6	8.37213	5.73181	3.64332	peak978
chr15	81958221	81958421	201	81958261	7	8.37159	5.91845	3.64332	peak979
chr15	84753472	84753688	217	84753614	7	8.37159	5.91845	3.64332	peak980
chr15	85062017	85062133	117	85062083	6	8.37213	5.73181	3.64332	peak981
chr15	88659331	88659432	102	88659391	6	8.37213	5.73181	3.64332	peak982
chr15	92134768	92134878	111	92134832	6	8.37213	5.73181	3.64332	peak983
chr15	103182957	103183101	145	103183047	6	8.27551	5.6975	3.64332	peak984
chr16	8412508	8412609	102	8412573	6	8.37213	5.73181	3.64332	peak985
chr16	11526546	11526679	134	11526605	6	8.37213	5.73181	3.64332	peak986
chr16	13653222	13653337	116	13653297	6	8.37213	5.73181	3.64332	peak987
chr16	21623421	21623520	100	21623484	6	8.37213	5.73181	3.64332	peak988
chr16	23550534	23550632	99	23550576	6	8.37213	5.73181	3.64332	peak989
chr16	30622533	30622662	130	30622594	6	8.37213	5.73181	3.64332	peak990
chr16	31521702	31521801	100	31521737	6	8.37213	5.73181	3.64332	peak991
chr16	31618405	31618549	145	31618483	6	8.35226	5.72481	3.64332	peak992
chr16	48993716	48993856	141	48993785	7	8.37159	5.91845	3.64332	peak993
chr16	67959257	67959407	151	67959341	6	8.37213	5.73181	3.64332	peak994
chr16	90899865	90899978	114	90899927	6	8.37213	5.73181	3.64332	peak995
chr17	11673315	11673447	133	11673393	6	8.37213	5.73181	3.64332	peak996
chr17	15714464	15714574	111	15714514	6	8.37213	5.73181	3.64332	peak997
chr17	23729587	23729690	104	23729645	6	8.37213	5.73181	3.64332	peak998
chr17	23809953	23810108	156	23810017	6	8.37213	5.73181	3.64332	peak999
chr17	24300505	24300786	282	24300703	6	8.37213	5.73181	3.64332	peak1000
chr17	26497307	26497420	114	26497379	6	8.37213	5.73181	3.64332	peak1001
chr17	35960211	35960308	98	35960250	6	8.37213	5.73181	3.64332	peak1002
chr17	50432254	50432417	164	50432326	6	8.37213	5.73181	3.64332	peak1003
chr17	57474268	57474365	98	57474313	6	8.37213	5.73181	3.64332	peak1004
chr17	74694154	74694263	110	74694237	6	8.37213	5.73181	3.64332	peak1005
chr17	87549993	87550118	126	87550050	6	8.37213	5.73181	3.64332	peak1006
chr18	3508243	3508345	103	3508285	6	8.27551	5.6975	3.64332	peak1007
chr18	33537956	33538134	179	33538041	6	8.37213	5.73181	3.64332	peak1008
chr18	56066412	56066513	102	56066449	6	8.37213	5.73181	3.64332	peak1009
chr18	62112375	62112472	98	62112435	6	8.37213	5.73181	3.64332	peak1010
chr18	64634235	64634414	180	64634323	6	8.37213	5.73181	3.64332	peak1011
chr18	76369029	76369126	98	76369085	6	8.37213	5.73181	3.64332	peak1012
chr18	80517346	80517445	100	80517436	6	8.37213	5.73181	3.64332	peak1013
chr18	83402138	83402283	146	83402210	6	8.37213	5.73181	3.64332	peak1014
chr18	85387100	85387198	99	85387163	6	8.37213	5.73181	3.64332	peak1015
chr19	4820744	4820966	223	4820890	6	8.37213	5.73181	3.64332	peak1016
chr19	5118148	5118269	122	5118233	6	8.37213	5.73181	3.64332	peak1017
chr19	24576888	24577004	117	24576949	6	8.37213	5.73181	3.64332	peak1018
chr19	25312194	25312293	100	25312223	6	8.37213	5.73181	3.64332	peak1019
chr19	30629261	30629401	141	30629340	6	8.37213	5.73181	3.64332	peak1020
chr19	32259259	32259357	99	32259304	6	8.37213	5.73181	3.64332	peak1021
chr19	33049227	33049348	122	33049268	6	8.37213	5.73181	3.64332	peak1022
chr19	37252535	37252666	132	37252598	7	8.37159	5.91845	3.64332	peak1023
chr19	40493853	40493966	114	40493912	6	8.37213	5.73181	3.64332	peak1024
chr19	40615576	40615681	106	40615635	6	8.37213	5.73181	3.64332	peak1025
chr19	53890382	53890479	98	53890392	6	8.37213	5.73181	3.64332	peak1026
chr19	55014821	55014942	122	55014883	6	8.37213	5.73181	3.64332	peak1027
chr19	55194103	55194227	125	55194154	6	8.37213	5.73181	3.64332	peak1028
chr19	59334454	59334553	100	59334467	6	8.37213	5.73181	3.64332	peak1029
chr2	21156673	21156804	132	21156747	6	8.37213	5.73181	3.64332	peak1030
chr2	28440787	28440927	141	28440860	6	8.37213	5.73181	3.64332	peak1031
chr2	30359688	30359864	177	30359776	6	8.37213	5.73181	3.64332	peak1032
chr2	30774360	30774535	176	30774451	6	8.37213	5.73181	3.64332	peak1033
chr2	31153816	31153939	124	31153875	6	8.37213	5.73181	3.64332	peak1034
chr2	32474316	32474434	119	32474387	6	8.37213	5.73181	3.64332	peak1035
chr2	50196846	50196945	100	50196896	6	8.37213	5.73181	3.64332	peak1036
chr2	51828479	51828590	112	51828537	6	8.37213	5.73181	3.64332	peak1037
chr2	64955000	64955137	138	64955060	6	8.37213	5.73181	3.64332	peak1038
chr2	92828149	92828266	118	92828206	6	8.37213	5.73181	3.64332	peak1039
chr2	94878767	94878866	100	94878812	6	8.37213	5.73181	3.64332	peak1040
chr2	117282226	117282345	120	117282284	6	8.27551	5.6975	3.64332	peak1041
chr2	119873147	119873267	121	119873196	6	8.37213	5.73181	3.64332	peak1042
chr2	120966491	120966590	100	120966532	6	8.37213	5.73181	3.64332	peak1043
chr2	126917945	126918042	98	126918001	6	8.37213	5.73181	3.64332	peak1044
chr2	128644260	128644390	131	128644312	7	8.37159	5.91845	3.64332	peak1045
chr2	144461803	144461920	118	144461871	7	8.37159	5.91845	3.64332	peak1046
chr2	153270092	153270192	101	153270122	6	8.37213	5.73181	3.64332	peak1047
chr2	158484806	158484967	162	158484877	6	8.37213	5.73181	3.64332	peak1048
chr2	160761943	160762064	122	160761996	6	8.37213	5.73181	3.64332	peak1049
chr2	163717099	163717197	99	163717164	6	8.37213	5.73181	3.64332	peak1050
chr2	164772664	164772804	141	164772724	6	8.37213	5.73181	3.64332	peak1051
chr2	165731961	165732063	103	165732011	6	8.37213	5.73181	3.64332	peak1052
chr2	167209727	167209828	102	167209771	6	8.27551	5.6975	3.64332	peak1053
chr2	168056357	168056471	115	168056423	6	8.37213	5.73181	3.64332	peak1054
chr2	172154836	172154933	98	172154894	6	8.37213	5.73181	3.64332	peak1055
chr2	172764784	172764881	98	172764821	7	8.37159	5.91845	3.64332	peak1056
chr2	180921373	180921540	168	180921456	7	8.37159	5.91845	3.64332	peak1057
chr3	9603965	9604115	151	9604019	6	8.37213	5.73181	3.64332	peak1058
chr3	20971975	20972075	101	20972029	6	8.27551	5.6975	3.64332	peak1059
chr3	31127418	31127534	117	31127480	6	8.37213	5.73181	3.64332	peak1060
chr3	50710045	50710183	139	50710122	6	8.37213	5.73181	3.64332	peak1061
chr3	52821093	52821237	145	52821167	6	8.37213	5.73181	3.64332	peak1062
chr3	57455621	57455733	113	57455687	6	8.37213	5.73181	3.64332	peak1063
chr3	85141884	85141993	110	85141941	6	8.37213	5.73181	3.64332	peak1064
chr3	85945748	85945857	110	85945804	6	8.37213	5.73181	3.64332	peak1065
chr3	87946275	87946457	183	87946369	6	8.27551	5.6975	3.64332	peak1066
chr3	89055671	89055774	104	89055696	6	8.37213	5.73181	3.64332	peak1067
chr3	94113947	94114054	108	94113982	6	8.37213	5.73181	3.64332	peak1068
chr3	96989171	96989268	98	96989236	6	8.37213	5.73181	3.64332	peak1069
chr3	102482705	102482841	137	102482793	6	8.37213	5.73181	3.64332	peak1070
chr3	108059705	108059826	122	108059771	6	8.37213	5.73181	3.64332	peak1071
chr3	111232681	111232793	113	111232744	6	8.37213	5.73181	3.64332	peak1072
chr3	132973287	132973561	275	132973347	7	8.37159	5.91845	3.64332	peak1073
chr3	142363123	142363233	111	142363178	6	8.27551	5.6975	3.64332	peak1074
chr3	145490293	145490471	179	145490378	6	8.37213	5.73181	3.64332	peak1075
chr4	4065985	4066082	98	4066025	6	8.37213	5.73181	3.64332	peak1076
chr4	31913790	31913899	110	31913865	6	8.37213	5.73181	3.64332	peak1077
chr4	43043760	43043884	125	43043825	6	8.37213	5.73181	3.64332	peak1078
chr4	45543512	45543674	163	45543593	8	8.26503	5.89175	3.64332	peak1079
chr4	53944407	53944569	163	53944495	6	8.37213	5.73181	3.64332	peak1080
chr4	62894021	62894143	123	62894056	6	8.37213	5.73181	3.64332	peak1081
chr4	80836007	80836128	122	80836092	6	8.37213	5.73181	3.64332	peak1082
chr4	95997417	95997514	98	95997456	6	8.37213	5.73181	3.64332	peak1083
chr4	109723647	109723835	189	109723788	6	8.37213	5.73181	3.64332	peak1084
chr4	115893793	115893902	110	115893883	6	8.37213	5.73181	3.64332	peak1085
chr4	124382162	124382265	104	124382189	6	8.35226	5.72481	3.64332	peak1086
chr4	128078999	128079102	104	128079079	6	8.37213	5.73181	3.64332	peak1087
chr4	129497599	129497751	153	129497669	6	8.37213	5.73181	3.64332	peak1088
chr4	130157878	130157983	106	130157905	6	8.37213	5.73181	3.64332	peak1089
chr4	131629022	131629128	107	131629048	6	8.37213	5.73181	3.64332	peak1090
chr4	133677006	133677117	112	133677060	6	8.37213	5.73181	3.64332	peak1091
chr4	134989819	134989934	116	134989889	6	8.37213	5.73181	3.64332	peak1092
chr4	141603054	141603299	246	141603133	6	8.37213	5.73181	3.64332	peak1093
chr4	153734606	153734716	111	153734668	6	8.37213	5.73181	3.64332	peak1094
chr4	154510165	154510282	118	154510210	6	8.37213	5.73181	3.64332	peak1095
chr4	155221657	155221790	134	155221734	6	8.37213	5.73181	3.64332	peak1096
chr5	5180426	5180527	102	5180483	6	8.37213	5.73181	3.64332	peak1097
chr5	8368166	8368297	132	8368243	6	8.37213	5.73181	3.64332	peak1098
chr5	15240219	15240377	159	15240289	6	8.37213	5.73181	3.64332	peak1099
chr5	17865954	17866059	106	17865990	6	8.37213	5.73181	3.64332	peak1100
chr5	20208158	20208265	108	20208207	6	8.37213	5.73181	3.64332	peak1101
chr5	24032298	24032486	189	24032391	6	8.37213	5.73181	3.64332	peak1102
chr5	33720512	33720685	174	33720595	6	8.37213	5.73181	3.64332	peak1103
chr5	36316548	36316650	103	36316587	6	8.37213	5.73181	3.64332	peak1104
chr5	36776617	36776716	100	36776667	6	8.37213	5.73181	3.64332	peak1105
chr5	64332343	64332508	166	64332413	6	8.37213	5.73181	3.64332	peak1106
chr5	92053596	92053719	124	92053684	6	8.37213	5.73181	3.64332	peak1107
chr5	93522512	93522633	122	93522578	6	8.37213	5.73181	3.64332	peak1108
chr5	101874883	101874989	107	101874963	6	8.37213	5.73181	3.64332	peak1109
chr5	113279838	113279937	100	113279899	6	8.37213	5.73181	3.64332	peak1110
chr5	113592786	113592884	99	113592848	6	8.37213	5.73181	3.64332	peak1111
chr5	114158715	114158814	100	114158724	6	8.37213	5.73181	3.64332	peak1112
chr5	115273271	115273372	102	115273280	6	8.37213	5.73181	3.64332	peak1113
chr5	115995344	115995485	142	115995441	6	8.37213	5.73181	3.64332	peak1114
chr5	118701173	118701272	100	118701208	6	8.27551	5.6975	3.64332	peak1115
chr5	123583560	123583657	98	123583603	6	8.37213	5.73181	3.64332	peak1116
chr5	127737692	127737833	142	127737759	6	8.37213	5.73181	3.64332	peak1117
chr5	127885940	127886070	131	127886004	6	8.37213	5.73181	3.64332	peak1118
chr5	135644700	135644835	136	135644777	6	8.37213	5.73181	3.64332	peak1119
chr5	138052565	138052712	148	138052641	6	8.37213	5.73181	3.64332	peak1120
chr5	139823122	139823221	100	139823190	6	8.37213	5.73181	3.64332	peak1121
chr5	140408630	140408770	141	140408684	7	8.37159	5.91845	3.64332	peak1122
chr5	149995790	149995988	199	149995899	6	8.37213	5.73181	3.64332	peak1123
chr6	5332640	5332763	124	5332691	6	8.37213	5.73181	3.64332	peak1124
chr6	15593220	15593364	145	15593303	6	8.37213	5.73181	3.64332	peak1125
chr6	16913344	16913443	100	16913400	6	8.37213	5.73181	3.64332	peak1126
chr6	18772957	18773066	110	18772991	6	8.37213	5.73181	3.64332	peak1127
chr6	28437572	28437709	138	28437644	6	8.37213	5.73181	3.64332	peak1128
chr6	30155696	30155793	98	30155775	6	8.37213	5.73181	3.64332	peak1129
chr6	34936660	34936759	100	34936729	6	8.37213	5.73181	3.64332	peak1130
chr6	38071042	38071141	100	38071061	7	8.37159	5.91845	3.64332	peak1131
chr6	39269320	39269437	118	39269370	6	8.37213	5.73181	3.64332	peak1132
chr6	47452404	47452539	136	47452484	6	8.37213	5.73181	3.64332	peak1133
chr6	49115980	49116077	98	49116032	6	8.37213	5.73181	3.64332	peak1134
chr6	83456817	83457001	185	83456895	6	8.37213	5.73181	3.64332	peak1135
chr6	85966970	85967072	103	85967040	6	8.37213	5.73181	3.64332	peak1136
chr6	99376646	99376743	98	99376706	6	8.37213	5.73181	3.64332	peak1137
chr6	105897783	105897882	100	105897863	6	8.37213	5.73181	3.64332	peak1138
chr6	108052687	108052793	107	108052746	6	8.37213	5.73181	3.64332	peak1139
chr6	121483008	121483107	100	121483063	6	8.37213	5.73181	3.64332	peak1140
chr6	128093490	128093594	105	128093524	6	8.37213	5.73181	3.64332	peak1141
chr6	135689985	135690094	110	135690025	6	8.37213	5.73181	3.64332	peak1142
chr6	136776448	136776587	140	136776501	6	8.37213	5.73181	3.64332	peak1143
chr6	146927814	146927911	98	146927882	6	8.37213	5.73181	3.64332	peak1144
chr7	17585137	17585242	106	17585187	6	8.37213	5.73181	3.64332	peak1145
chr7	25340937	25341037	101	25340982	6	8.37213	5.73181	3.64332	peak1146
chr7	31497115	31497254	140	31497188	6	8.37213	5.73181	3.64332	peak1147
chr7	82940201	82940300	100	82940237	6	8.37213	5.73181	3.64332	peak1148
chr7	87211659	87211762	104	87211721	6	8.37213	5.73181	3.64332	peak1149
chr7	89461794	89461891	98	89461862	6	8.37213	5.73181	3.64332	peak1150
chr7	105509862	105509990	129	105509904	7	8.37159	5.91845	3.64332	peak1151
chr7	110991808	110991944	137	110991885	6	8.37213	5.73181	3.64332	peak1152
chr7	120281948	120282047	100	120281963	6	8.37213	5.73181	3.64332	peak1153
chr7	121649378	121649475	98	121649400	6	8.37213	5.73181	3.64332	peak1154
chr7	129867077	129867174	98	129867138	6	8.37213	5.73181	3.64332	peak1155
chr7	132588228	132588375	148	132588317	7	8.37159	5.91845	3.64332	peak1156
chr7	149511172	149511273	102	149511221	6	8.37213	5.73181	3.64332	peak1157
chr7	150105270	150105401	132	150105333	7	8.37159	5.91845	3.64332	peak1158
chr7	150575182	150575280	99	150575238	6	8.37213	5.73181	3.64332	peak1159
chr7	150734524	150734770	247	150734576	6	8.37213	5.73181	3.64332	peak1160
chr7	151656358	151656456	99	151656400	6	8.37213	5.73181	3.64332	peak1161
chr8	4267769	4267879	111	4267793	6	8.37213	5.73181	3.64332	peak1162
chr8	10414945	10415042	98	10415023	7	8.37159	5.91845	3.64332	peak1163
chr8	11469154	11469270	117	11469239	7	8.37159	5.91845	3.64332	peak1164
chr8	13356855	13356956	102	13356901	6	8.37213	5.73181	3.64332	peak1165
chr8	26616536	26616644	109	26616595	6	8.37213	5.73181	3.64332	peak1166
chr8	35249360	35249466	107	35249397	6	8.37213	5.73181	3.64332	peak1167
chr8	74178627	74178754	128	74178686	7	8.37159	5.91845	3.64332	peak1168
chr8	81821779	81821882	104	81821847	6	8.37213	5.73181	3.64332	peak1169
chr8	85966153	85966309	157	85966226	6	8.37213	5.73181	3.64332	peak1170
chr8	86716558	86716666	109	86716629	6	8.37213	5.73181	3.64332	peak1171
chr8	87504225	87504383	159	87504304	6	8.37213	5.73181	3.64332	peak1172
chr8	87549141	87549339	199	87549203	6	8.27551	5.6975	3.64332	peak1173
chr8	99304973	99305070	98	99305047	6	8.37213	5.73181	3.64332	peak1174
chr8	107841764	107841888	125	107841806	6	8.35226	5.72481	3.64332	peak1175
chr8	111031324	111031435	112	111031391	6	8.37213	5.73181	3.64332	peak1176
chr8	113580432	113580543	112	113580472	6	8.37213	5.73181	3.64332	peak1177
chr8	121148521	121148674	154	121148596	6	8.37213	5.73181	3.64332	peak1178
chr8	122223919	122224056	138	122223994	6	8.37213	5.73181	3.64332	peak1179
chr8	123094391	123094581	191	123094488	6	8.37213	5.73181	3.64332	peak1180
chr8	123248963	123249069	107	123248996	6	8.37213	5.73181	3.64332	peak1181
chr8	125392977	125393076	100	125393002	6	8.37213	5.73181	3.64332	peak1182
chr8	126545218	126545332	115	126545263	6	8.37213	5.73181	3.64332	peak1183
chr9	4436893	4436990	98	4436930	6	8.37213	5.73181	3.64332	peak1184
chr9	14081154	14081295	142	14081214	6	8.37213	5.73181	3.64332	peak1185
chr9	21722500	21722597	98	21722552	6	8.37213	5.73181	3.64332	peak1186
chr9	34306347	34306453	107	34306417	6	8.37213	5.73181	3.64332	peak1187
chr9	43353559	43353682	124	43353609	7	8.37159	5.91845	3.64332	peak1188
chr9	44318329	44318430	102	44318364	6	8.37213	5.73181	3.64332	peak1189
chr9	46038041	46038196	156	46038127	6	8.37213	5.73181	3.64332	peak1190
chr9	48569018	48569122	105	48569104	6	8.35226	5.72481	3.64332	peak1191
chr9	48640103	48640204	102	48640149	6	8.37213	5.73181	3.64332	peak1192
chr9	50467853	50468006	154	50467933	6	8.37213	5.73181	3.64332	peak1193
chr9	54434106	54434232	127	54434140	6	8.37213	5.73181	3.64332	peak1194
chr9	60788025	60788130	106	60788108	7	8.37159	5.91845	3.64332	peak1195
chr9	63550436	63550537	102	63550504	6	8.37213	5.73181	3.64332	peak1196
chr9	66359518	66359629	112	66359588	6	8.35226	5.72481	3.64332	peak1197
chr9	89977998	89978126	129	89978062	6	8.37213	5.73181	3.64332	peak1198
chr9	91166534	91166645	112	91166618	6	8.37213	5.73181	3.64332	peak1199
chr9	95081060	95081182	123	95081131	6	8.37213	5.73181	3.64332	peak1200
chr9	95868880	95868984	105	95868897	6	8.37213	5.73181	3.64332	peak1201
chr9	99468886	99469128	243	99468952	6	8.37213	5.73181	3.64332	peak1202
chr9	99481244	99481352	109	99481314	6	8.37213	5.73181	3.64332	peak1203
chr9	100504043	100504170	128	100504086	6	8.37213	5.73181	3.64332	peak1204
chr9	100996710	100996807	98	100996779	6	8.37213	5.73181	3.64332	peak1205
chr9	107284159	107284303	145	107284240	7	8.37159	5.91845	3.64332	peak1206
chr9	108209131	108209247	117	108209216	6	8.37213	5.73181	3.64332	peak1207
chr9	118889574	118889698	125	118889617	6	8.37213	5.73181	3.64332	peak1208
chrX	10858712	10858811	100	10858732	6	8.37213	5.73181	3.64332	peak1209
chrX	50410408	50410529	122	50410469	7	8.37159	5.91845	3.64332	peak1210
chr10	43988148	43988295	148	43988212	11	8.22427	5.46379	3.62916	peak1211
chr2	142888770	142888909	140	142888820	11	8.22427	5.46379	3.62916	peak1212
chr2	156555931	156556065	135	156556013	11	8.22427	5.46379	3.62916	peak1213
chr6	128999196	128999381	186	128999284	11	8.22427	5.46379	3.62916	peak1214
chr9	108241357	108241485	129	108241453	11	8.22427	5.46379	3.62916	peak1215
chr1	59969595	59969721	127	59969674	6	8.20077	5.67045	3.60759	peak1216
chr1	84931749	84931858	110	84931795	6	8.20077	5.67045	3.60759	peak1217
chr1	129670511	129670702	192	129670649	6	8.20077	5.67045	3.60759	peak1218
chr1	166634913	166635022	110	166634977	6	8.20077	5.67045	3.60759	peak1219
chr1	177622460	177622566	107	177622517	6	8.20077	5.67045	3.60759	peak1220
chr1	179700901	179701003	103	179700929	6	8.20077	5.67045	3.60759	peak1221
chr1	193080781	193080893	113	193080839	6	8.20077	5.67045	3.60759	peak1222
chr10	20081796	20081920	125	20081861	6	8.20077	5.67045	3.60759	peak1223
chr10	61340659	61340763	105	61340709	6	8.20077	5.67045	3.60759	peak1224
chr10	75384208	75384307	100	75384264	6	8.20077	5.67045	3.60759	peak1225
chr10	79297639	79297760	122	79297702	6	8.20077	5.67045	3.60759	peak1226
chr11	5035927	5036072	146	5035991	6	8.20077	5.67045	3.60759	peak1227
chr11	41446114	41446268	155	41446181	6	8.20077	5.67045	3.60759	peak1228
chr11	50264426	50264524	99	50264481	6	8.20077	5.67045	3.60759	peak1229
chr11	59285758	59285873	116	59285836	6	8.20077	5.67045	3.60759	peak1230
chr11	94072660	94072813	154	94072734	6	8.20077	5.67045	3.60759	peak1231
chr11	99394401	99394580	180	99394490	6	8.20077	5.67045	3.60759	peak1232
chr11	103666755	103666852	98	103666816	6	8.20077	5.67045	3.60759	peak1233
chr11	116036551	116036666	116	116036600	6	8.20077	5.67045	3.60759	peak1234
chr11	118914627	118914771	145	118914720	6	8.20077	5.67045	3.60759	peak1235
chr12	33999639	33999739	101	33999681	6	8.20077	5.67045	3.60759	peak1236
chr12	73861788	73861885	98	73861848	6	8.20077	5.67045	3.60759	peak1237
chr12	74968046	74968143	98	74968122	6	8.20077	5.67045	3.60759	peak1238
chr12	80130589	80130686	98	80130616	6	8.20077	5.67045	3.60759	peak1239
chr12	84861272	84861389	118	84861314	6	8.20077	5.67045	3.60759	peak1240
chr12	120816434	120816534	101	120816472	6	8.20077	5.67045	3.60759	peak1241
chr14	26513995	26514106	112	26514026	6	8.20077	5.67045	3.60759	peak1242
chr14	33411176	33411294	119	33411241	6	8.20077	5.67045	3.60759	peak1243
chr14	48763635	48763743	109	48763698	6	8.20077	5.67045	3.60759	peak1244
chr14	55633947	55634056	110	55634019	6	8.20077	5.67045	3.60759	peak1245
chr15	7739228	7739327	100	7739244	6	8.20077	5.67045	3.60759	peak1246
chr15	27740717	27740822	106	27740757	6	8.20077	5.67045	3.60759	peak1247
chr15	78856250	78856352	103	78856304	6	8.20077	5.67045	3.60759	peak1248
chr16	4075856	4075953	98	4075898	6	8.20077	5.67045	3.60759	peak1249
chr16	7646992	7647090	99	7647021	6	8.20077	5.67045	3.60759	peak1250
chr16	44139925	44140233	309	44139977	6	8.20077	5.67045	3.60759	peak1251
chr16	45536727	45536829	103	45536802	6	8.20077	5.67045	3.60759	peak1252
chr16	91585980	91586122	143	91586058	6	8.20077	5.67045	3.60759	peak1253
chr17	35950333	35950435	103	35950417	6	8.20077	5.67045	3.60759	peak1254
chr17	37139795	37139904	110	37139849	6	8.20077	5.67045	3.60759	peak1255
chr17	56094517	56094640	124	56094573	6	8.20077	5.67045	3.60759	peak1256
chr17	85489569	85489685	117	85489652	6	8.20077	5.67045	3.60759	peak1257
chr17	86567229	86567334	106	86567265	6	8.20077	5.67045	3.60759	peak1258
chr18	35974427	35974562	136	35974467	6	8.20077	5.67045	3.60759	peak1259
chr18	36539577	36539753	177	36539660	6	8.20077	5.67045	3.60759	peak1260
chr18	76310806	76310962	157	76310874	6	8.20077	5.67045	3.60759	peak1261
chr19	43350560	43350659	100	43350612	6	8.20077	5.67045	3.60759	peak1262
chr2	11134001	11134113	113	11134050	6	8.20077	5.67045	3.60759	peak1263
chr2	32275022	32275126	105	32275070	6	8.20077	5.67045	3.60759	peak1264
chr2	35507069	35507190	122	35507157	6	8.20077	5.67045	3.60759	peak1265
chr2	35585265	35585365	101	35585308	6	8.20077	5.67045	3.60759	peak1266
chr2	36132187	36132297	111	36132276	6	8.20077	5.67045	3.60759	peak1267
chr2	75430601	75430700	100	75430649	6	8.20077	5.67045	3.60759	peak1268
chr2	159828379	159828478	100	159828397	6	8.20077	5.67045	3.60759	peak1269
chr2	179818853	179818964	112	179818896	6	8.20077	5.67045	3.60759	peak1270
chr3	79395190	79395359	170	79395279	6	8.20077	5.67045	3.60759	peak1271
chr3	104245894	104246050	157	104245974	6	8.20077	5.67045	3.60759	peak1272
chr3	135101644	135101743	100	135101680	6	8.20077	5.67045	3.60759	peak1273
chr4	20206893	20206990	98	20206934	6	8.20077	5.67045	3.60759	peak1274
chr4	35716921	35717019	99	35716947	6	8.20077	5.67045	3.60759	peak1275
chr4	62466966	62467076	111	62467025	6	8.20077	5.67045	3.60759	peak1276
chr4	119833857	119833964	108	119833897	6	8.20077	5.67045	3.60759	peak1277
chr4	126418822	126418919	98	126418882	6	8.20077	5.67045	3.60759	peak1278
chr4	148820135	148820242	108	148820164	6	8.20077	5.67045	3.60759	peak1279
chr4	151307689	151307809	121	151307750	6	8.20077	5.67045	3.60759	peak1280
chr4	155222007	155222128	122	155222067	6	8.20077	5.67045	3.60759	peak1281
chr5	8997405	8997512	108	8997460	6	8.20077	5.67045	3.60759	peak1282
chr5	30399789	30399894	106	30399827	6	8.20077	5.67045	3.60759	peak1283
chr5	31210153	31210279	127	31210224	6	8.20077	5.67045	3.60759	peak1284
chr5	72602174	72602338	165	72602251	6	8.20077	5.67045	3.60759	peak1285
chr5	104246897	104247007	111	104246928	6	8.20077	5.67045	3.60759	peak1286
chr5	120917245	120917344	100	120917306	6	8.20077	5.67045	3.60759	peak1287
chr5	125734905	125735017	113	125734945	6	8.20077	5.67045	3.60759	peak1288
chr5	125873642	125873771	130	125873691	6	8.20077	5.67045	3.60759	peak1289
chr5	143105685	143105782	98	143105750	6	8.20077	5.67045	3.60759	peak1290
chr6	29434672	29434830	159	29434754	6	8.20077	5.67045	3.60759	peak1291
chr6	56426691	56426799	109	56426711	6	8.20077	5.67045	3.60759	peak1292
chr6	87193748	87193845	98	87193788	6	8.20077	5.67045	3.60759	peak1293
chr6	119987927	119988049	123	119987973	6	8.20077	5.67045	3.60759	peak1294
chr6	137736309	137736429	121	137736365	6	8.20077	5.67045	3.60759	peak1295
chr6	143676780	143676887	108	143676827	6	8.20077	5.67045	3.60759	peak1296
chr7	5003046	5003148	103	5003093	6	8.20077	5.67045	3.60759	peak1297
chr7	119369380	119369479	100	119369413	6	8.20077	5.67045	3.60759	peak1298
chr7	123451273	123451439	167	123451364	6	8.20077	5.67045	3.60759	peak1299
chr7	125932227	125932324	98	125932271	6	8.20077	5.67045	3.60759	peak1300
chr7	132850909	132851011	103	132850959	6	8.20077	5.67045	3.60759	peak1301
chr7	134921312	134921414	103	134921348	6	8.20077	5.67045	3.60759	peak1302
chr7	146659247	146659363	117	146659307	6	8.20077	5.67045	3.60759	peak1303
chr8	12720846	12720952	107	12720897	6	8.20077	5.67045	3.60759	peak1304
chr8	49928978	49929076	99	49929006	6	8.20077	5.67045	3.60759	peak1305
chr8	96242645	96242767	123	96242687	6	8.20077	5.67045	3.60759	peak1306
chr8	112637942	112638056	115	112637985	6	8.20077	5.67045	3.60759	peak1307
chr9	9018403	9018506	104	9018482	6	8.20077	5.67045	3.60759	peak1308
chr9	36955015	36955123	109	36955088	6	8.20077	5.67045	3.60759	peak1309
chr9	58051994	58052092	99	58052029	6	8.20077	5.67045	3.60759	peak1310
chr9	68501389	68501486	98	68501421	6	8.20077	5.67045	3.60759	peak1311
chr9	99370408	99370505	98	99370446	6	8.20077	5.67045	3.60759	peak1312
chr9	3025432	3025581	150	3025508	129	8.14273	1.70234	3.58237	peak1313
chr1	173177235	173177370	136	173177299	6	8.12792	5.64365	3.56765	peak1314
chr10	4540703	4540910	208	4540737	6	8.12792	5.64365	3.56765	peak1315
chr10	79724083	79724197	115	79724147	6	8.12792	5.64365	3.56765	peak1316
chr11	5780139	5780244	106	5780209	6	8.12792	5.64365	3.56765	peak1317
chr13	49199724	49199876	153	49199791	6	8.12792	5.64365	3.56765	peak1318
chr14	64414160	64414272	113	64414216	6	8.12792	5.64365	3.56765	peak1319
chr15	97738617	97738727	111	97738663	6	8.12792	5.64365	3.56765	peak1320
chr17	56901747	56901863	117	56901809	6	8.12792	5.64365	3.56765	peak1321
chr18	49344401	49344507	107	49344443	6	8.12792	5.64365	3.56765	peak1322
chr18	65185558	65185676	119	65185626	6	8.12792	5.64365	3.56765	peak1323
chr2	27086939	27087059	121	27086980	6	8.12792	5.64365	3.56765	peak1324
chr2	73422782	73422883	102	73422860	6	8.12792	5.64365	3.56765	peak1325
chr2	102723664	102723763	100	102723714	6	8.12792	5.64365	3.56765	peak1326
chr2	163539077	163539231	155	163539154	6	8.12792	5.64365	3.56765	peak1327
chr3	148514193	148514292	100	148514228	6	8.12792	5.64365	3.56765	peak1328
chr4	43439681	43439778	98	43439739	6	8.12792	5.64365	3.56765	peak1329
chr5	137354177	137354276	100	137354204	6	8.12792	5.64365	3.56765	peak1330
chr7	106416828	106416927	100	106416856	6	8.12792	5.64365	3.56765	peak1331
chr7	140242608	140242731	124	140242664	6	8.12792	5.64365	3.56765	peak1332
chr9	121351820	121351925	106	121351873	6	8.12792	5.64365	3.56765	peak1333
chr1	154657022	154657165	144	154657078	6	8.05688	5.6171	3.50477	peak1334
chr11	94790310	94790468	159	94790387	6	8.05688	5.6171	3.50477	peak1335
chr12	74542366	74542496	131	74542420	6	8.05688	5.6171	3.50477	peak1336
chr12	112217439	112217656	218	112217477	6	8.05688	5.6171	3.50477	peak1337
chr14	22800416	22800518	103	22800461	6	8.05688	5.6171	3.50477	peak1338
chr16	91056398	91056495	98	91056463	6	8.05688	5.6171	3.50477	peak1339
chr17	26149203	26149300	98	26149260	6	8.05688	5.6171	3.50477	peak1340
chr17	29215194	29215297	104	29215236	6	8.05688	5.6171	3.50477	peak1341
chr18	36899546	36899676	131	36899634	6	8.05688	5.6171	3.50477	peak1342
chr2	130455661	130455763	103	130455719	6	8.05688	5.6171	3.50477	peak1343
chr2	158103779	158103885	107	158103821	6	8.05688	5.6171	3.50477	peak1344
chr3	89072350	89072447	98	89072420	6	8.05688	5.6171	3.50477	peak1345
chr5	124933215	124933371	157	124933294	6	8.05688	5.6171	3.50477	peak1346
chr8	46020053	46020166	114	46020102	6	8.05688	5.6171	3.50477	peak1347
chr1	193770170	193770272	103	193770245	6	7.98757	5.59081	3.44082	peak1348
chr12	74214258	74214381	124	74214309	6	7.98757	5.59081	3.44082	peak1349
chr13	60279083	60279188	106	60279136	6	7.98757	5.59081	3.44082	peak1350
chr14	27928715	27928839	125	27928775	6	7.98757	5.59081	3.44082	peak1351
chr3	58218714	58218835	122	58218780	6	7.98757	5.59081	3.44082	peak1352
chr3	96500296	96500396	101	96500346	6	7.98757	5.59081	3.44082	peak1353
chr3	105697971	105698103	133	105698046	6	7.98757	5.59081	3.44082	peak1354
chr4	71861517	71861616	100	71861547	6	7.98757	5.59081	3.44082	peak1355
chr4	101320327	101320424	98	101320351	6	7.98757	5.59081	3.44082	peak1356
chr6	38483592	38483689	98	38483631	6	7.98757	5.59081	3.44082	peak1357
chr8	73224630	73224727	98	73224680	6	7.98757	5.59081	3.44082	peak1358
chr8	122758601	122758700	100	122758615	6	7.98757	5.59081	3.44082	peak1359
chr9	107611963	107612102	140	107612021	6	7.98757	5.59081	3.44082	peak1360
chr1	81285627	81285726	100	81285655	6	7.9199	5.56475	3.37627	peak1361
chr10	3164560	3164667	108	3164609	6	7.9199	5.56475	3.37627	peak1362
chr11	100488398	100488508	111	100488436	6	7.9199	5.56475	3.37627	peak1363
chr12	112536346	112536456	111	112536390	6	7.9199	5.56475	3.37627	peak1364
chr14	124060527	124060655	129	124060597	6	7.9199	5.56475	3.37627	peak1365
chr19	59314125	59314230	106	59314146	6	7.9199	5.56475	3.37627	peak1366
chr2	104653849	104653994	146	104653929	6	7.9199	5.56475	3.37627	peak1367
chr2	132408071	132408186	116	132408143	6	7.9199	5.56475	3.37627	peak1368
chr8	129847972	129848108	137	129848064	6	7.9199	5.56475	3.37627	peak1369
chr9	122477938	122478036	99	122478000	6	7.9199	5.56475	3.37627	peak1370
chr17	83623805	83623985	181	83623879	8	7.876	5.67402	3.33601	peak1371
chr10	12589300	12589442	143	12589365	7	7.85854	5.67246	3.31928	peak1372
chr11	115126711	115126828	118	115126769	7	7.85854	5.67246	3.31928	peak1373
chr11	119081397	119081501	105	119081464	7	7.85854	5.67246	3.31928	peak1374
chr12	73186668	73186831	164	73186761	7	7.85854	5.67246	3.31928	peak1375
chr14	26137497	26137615	119	26137534	7	7.85854	5.67246	3.31928	peak1376
chr14	55724007	55724108	102	55724063	7	7.85854	5.67246	3.31928	peak1377
chr15	34167791	34167889	99	34167845	7	7.85854	5.67246	3.31928	peak1378
chr17	28464630	28464741	112	28464680	7	7.85854	5.67246	3.31928	peak1379
chr17	56724246	56724394	149	56724354	7	7.85854	5.67246	3.31928	peak1380
chr3	83568286	83568391	106	83568332	7	7.85854	5.67246	3.31928	peak1381
chr4	8219903	8220007	105	8219958	7	7.85854	5.67246	3.31928	peak1382
chr7	29594106	29594232	127	29594181	7	7.85854	5.67246	3.31928	peak1383
chr1	135277249	135277376	128	135277292	6	7.8538	5.53894	3.319	peak1384
chr15	76352611	76352760	150	76352659	6	7.8538	5.53894	3.319	peak1385
chr15	97598113	97598232	120	97598159	6	7.8538	5.53894	3.319	peak1386
chr15	101241356	101241458	103	101241375	6	7.8538	5.53894	3.319	peak1387
chr16	28885782	28885883	102	28885848	6	7.8538	5.53894	3.319	peak1388
chr3	89110043	89110219	177	89110139	6	7.8538	5.53894	3.319	peak1389
chr4	147317281	147317378	98	147317322	6	7.8538	5.53894	3.319	peak1390
chr7	29163709	29163870	162	29163790	6	7.8538	5.53894	3.319	peak1391
chr8	122942459	122942562	104	122942507	6	7.8538	5.53894	3.319	peak1392
chr1	7079072	7079271	200	7079189	8	7.80168	5.63155	3.27035	peak1393
chr1	88331274	88331444	171	88331365	8	7.80168	5.63155	3.27035	peak1394
chr1	163061562	163061750	189	163061650	8	7.80168	5.63155	3.27035	peak1395
chr10	23518069	23518219	151	23518156	8	7.80168	5.63155	3.27035	peak1396
chr11	22517715	22517836	122	22517751	8	7.80168	5.63155	3.27035	peak1397
chr11	68910534	68910649	116	68910600	8	7.80168	5.63155	3.27035	peak1398
chr11	72225634	72225735	102	72225683	8	7.80168	5.63155	3.27035	peak1399
chr11	87405722	87405855	134	87405812	8	7.80168	5.63155	3.27035	peak1400
chr11	96825126	96825263	138	96825183	8	7.80168	5.63155	3.27035	peak1401
chr11	101025380	101025512	133	101025430	6	7.7892	5.51337	3.27035	peak1402
chr12	44073866	44073963	98	44073939	8	7.80168	5.63155	3.27035	peak1403
chr12	86311803	86311913	111	86311830	8	7.80168	5.63155	3.27035	peak1404
chr13	45001586	45001764	179	45001628	8	7.80168	5.63155	3.27035	peak1405
chr13	90868762	90868865	104	90868840	8	7.80168	5.63155	3.27035	peak1406
chr14	26663976	26664153	178	26664064	8	7.80168	5.63155	3.27035	peak1407
chr14	55502267	55502378	112	55502337	6	7.7892	5.51337	3.27035	peak1408
chr15	25571272	25571388	117	25571333	8	7.80168	5.63155	3.27035	peak1409
chr15	89009417	89009533	117	89009461	8	7.80168	5.63155	3.27035	peak1410
chr15	90880311	90880432	122	90880359	8	7.80168	5.63155	3.27035	peak1411
chr15	102455939	102456042	104	102455981	8	7.80168	5.63155	3.27035	peak1412
chr16	18396469	18396596	128	18396515	8	7.80168	5.63155	3.27035	peak1413
chr16	23984372	23984491	120	23984397	8	7.80168	5.63155	3.27035	peak1414
chr18	12154554	12154673	120	12154615	8	7.80168	5.63155	3.27035	peak1415
chr18	60808631	60808746	116	60808654	8	7.80168	5.63155	3.27035	peak1416
chr19	55630855	55630977	123	55630931	8	7.80168	5.63155	3.27035	peak1417
chr19	57224940	57225037	98	57224977	8	7.80168	5.63155	3.27035	peak1418
chr2	10064522	10064628	107	10064547	8	7.80168	5.63155	3.27035	peak1419
chr2	118709254	118709385	132	118709302	8	7.80168	5.63155	3.27035	peak1420
chr2	140220908	140221062	155	140220976	8	7.80168	5.63155	3.27035	peak1421
chr2	155207794	155207907	114	155207849	8	7.80168	5.63155	3.27035	peak1422
chr3	34384973	34385080	108	34385030	8	7.80168	5.63155	3.27035	peak1423
chr3	101513370	101513470	101	101513414	6	7.7892	5.51337	3.27035	peak1424
chr3	145848065	145848209	145	145848126	8	7.80168	5.63155	3.27035	peak1425
chr4	94945488	94945616	129	94945556	8	7.80168	5.63155	3.27035	peak1426
chr4	98787603	98787816	214	98787667	8	7.80168	5.63155	3.27035	peak1427
chr4	116358458	116358581	124	116358514	8	7.80168	5.63155	3.27035	peak1428
chr4	133312767	133312906	140	133312858	8	7.80168	5.63155	3.27035	peak1429
chr4	136843899	136844004	106	136843939	8	7.80168	5.63155	3.27035	peak1430
chr4	150264857	150264962	106	150264905	8	7.80168	5.63155	3.27035	peak1431
chr4	155451886	155452001	116	155451933	6	7.7892	5.51337	3.27035	peak1432
chr5	24191245	24191378	134	24191318	8	7.80168	5.63155	3.27035	peak1433
chr5	24512916	24513066	151	24512976	8	7.80168	5.63155	3.27035	peak1434
chr5	112704328	112704456	129	112704413	8	7.80168	5.63155	3.27035	peak1435
chr5	118291976	118292073	98	118292034	8	7.80168	5.63155	3.27035	peak1436
chr5	139324144	139324261	118	139324203	8	7.80168	5.63155	3.27035	peak1437
chr5	139473565	139473731	167	139473661	8	7.80168	5.63155	3.27035	peak1438
chr6	29155296	29155448	153	29155360	8	7.80168	5.63155	3.27035	peak1439
chr7	52359211	52359321	111	52359263	8	7.80168	5.63155	3.27035	peak1440
chr7	107129877	107130068	192	107129996	8	7.80168	5.63155	3.27035	peak1441
chr7	136807576	136807729	154	136807665	8	7.80168	5.63155	3.27035	peak1442
chr8	26351134	26351233	100	26351176	8	7.80168	5.63155	3.27035	peak1443
chr8	46084163	46084262	100	46084209	8	7.80168	5.63155	3.27035	peak1444
chr8	47020261	47020362	102	47020315	8	7.80168	5.63155	3.27035	peak1445
chr8	107126781	107126909	129	107126845	8	7.80168	5.63155	3.27035	peak1446
chr8	122210213	122210358	146	122210270	8	7.80168	5.63155	3.27035	peak1447
chr9	41918376	41918496	121	41918440	8	7.80168	5.63155	3.27035	peak1448
chr9	63897652	63897790	139	63897721	8	7.80168	5.63155	3.27035	peak1449
chr18	80909133	80909256	124	80909199	7	7.76517	5.62569	3.25624	peak1450
chr1	95565536	95565668	133	95565595	6	7.72604	5.48803	3.2172	peak1451
chr11	79524469	79524574	106	79524523	6	7.72604	5.48803	3.2172	peak1452
chr11	118953006	118953107	102	118953056	6	7.72604	5.48803	3.2172	peak1453
chr8	86423959	86424060	102	86424005	6	7.72604	5.48803	3.2172	peak1454
chr9	108996356	108996512	157	108996432	6	7.72604	5.48803	3.2172	peak1455
chr10	39275607	39275704	98	39275647	6	7.66425	5.46293	3.15707	peak1456
chr10	74976142	74976252	111	74976163	6	7.66425	5.46293	3.15707	peak1457
chr12	114384750	114384890	141	114384825	6	7.66425	5.46293	3.15707	peak1458
chr15	96879948	96880048	101	96879993	6	7.66425	5.46293	3.15707	peak1459
chr15	98637303	98637403	101	98637332	6	7.66425	5.46293	3.15707	peak1460
chr18	60889925	60890114	190	60889970	6	7.66425	5.46293	3.15707	peak1461
chr5	147605628	147605772	145	147605683	6	7.66425	5.46293	3.15707	peak1462
chr6	13628039	13628163	125	13628100	6	7.66425	5.46293	3.15707	peak1463
chr8	86423681	86423785	105	86423743	6	7.66425	5.46293	3.15707	peak1464
chr8	92872276	92872456	181	92872382	6	7.66425	5.46293	3.15707	peak1465
chr10	12456860	12456987	128	12456930	6	7.60379	5.43805	3.09873	peak1466
chr16	4603150	4603437	288	4603361	6	7.60379	5.43805	3.09873	peak1467
chr8	87601012	87601163	152	87601088	6	7.60379	5.43805	3.09873	peak1468
chr1	4775779	4775893	115	4775857	6	7.54459	5.4134	3.04047	peak1469
chr1	92859888	92859987	100	92859911	6	7.54459	5.4134	3.04047	peak1470
chr10	39187425	39187542	118	39187477	6	7.54459	5.4134	3.04047	peak1471
chr10	40020706	40020803	98	40020738	6	7.54459	5.4134	3.04047	peak1472
chr10	40068533	40068638	106	40068584	6	7.54459	5.4134	3.04047	peak1473
chr10	66998851	66998952	102	66998903	6	7.54459	5.4134	3.04047	peak1474
chr11	3327998	3328101	104	3328029	6	7.54459	5.4134	3.04047	peak1475
chr11	74662023	74662129	107	74662067	6	7.54459	5.4134	3.04047	peak1476
chr11	95446627	95446818	192	95446707	6	7.54459	5.4134	3.04047	peak1477
chr11	106136593	106136693	101	106136639	6	7.54459	5.4134	3.04047	peak1478
chr11	117706438	117706535	98	117706491	6	7.54459	5.4134	3.04047	peak1479
chr12	72238053	72238150	98	72238080	6	7.54459	5.4134	3.04047	peak1480
chr12	104771256	104771360	105	104771313	6	7.54459	5.4134	3.04047	peak1481
chr12	110030644	110030772	129	110030725	6	7.54459	5.4134	3.04047	peak1482
chr13	58228991	58229103	113	58229036	6	7.54459	5.4134	3.04047	peak1483
chr13	95788126	95788228	103	95788182	6	7.54459	5.4134	3.04047	peak1484
chr13	96661760	96661881	122	96661817	6	7.54459	5.4134	3.04047	peak1485
chr14	8650361	8650521	161	8650429	6	7.54459	5.4134	3.04047	peak1486
chr14	47918270	47918381	112	47918293	6	7.54459	5.4134	3.04047	peak1487
chr14	87816765	87816862	98	87816812	6	7.54459	5.4134	3.04047	peak1488
chr15	102185929	102186049	121	102185990	6	7.54459	5.4134	3.04047	peak1489
chr16	16870420	16870572	153	16870507	6	7.54459	5.4134	3.04047	peak1490
chr16	78377277	78377423	147	78377368	6	7.54459	5.4134	3.04047	peak1491
chr17	9035622	9035723	102	9035708	6	7.54459	5.4134	3.04047	peak1492
chr17	14405222	14405327	106	14405270	6	7.54459	5.4134	3.04047	peak1493
chr17	31629573	31629711	139	31629643	6	7.54459	5.4134	3.04047	peak1494
chr17	35272118	35272227	110	35272161	6	7.54459	5.4134	3.04047	peak1495
chr17	36016656	36016784	129	36016749	8	7.52624	5.47181	3.04047	peak1496
chr17	66234118	66234217	100	66234174	6	7.54459	5.4134	3.04047	peak1497
chr18	38373219	38373359	141	38373276	6	7.54459	5.4134	3.04047	peak1498
chr18	82886877	82886980	104	82886923	6	7.54459	5.4134	3.04047	peak1499
chr19	4191948	4192049	102	4192018	6	7.54459	5.4134	3.04047	peak1500
chr19	6331694	6331894	201	6331743	6	7.54459	5.4134	3.04047	peak1501
chr19	7497895	7498016	122	7497935	6	7.54459	5.4134	3.04047	peak1502
chr19	11987202	11987368	167	11987281	6	7.54459	5.4134	3.04047	peak1503
chr19	22213760	22213907	148	22213813	6	7.54459	5.4134	3.04047	peak1504
chr19	24551605	24551730	126	24551668	6	7.54459	5.4134	3.04047	peak1505
chr19	32275962	32276059	98	32276010	6	7.54459	5.4134	3.04047	peak1506
chr19	46673361	46673502	142	46673427	6	7.54459	5.4134	3.04047	peak1507
chr19	55977417	55977522	106	55977448	6	7.54459	5.4134	3.04047	peak1508
chr19	60656417	60656518	102	60656482	6	7.54459	5.4134	3.04047	peak1509
chr2	103324928	103325025	98	103324971	6	7.54459	5.4134	3.04047	peak1510
chr2	155576826	155576930	105	155576881	6	7.54459	5.4134	3.04047	peak1511
chr2	179986090	179986192	103	179986155	6	7.54459	5.4134	3.04047	peak1512
chr3	75878482	75878579	98	75878554	6	7.54459	5.4134	3.04047	peak1513
chr3	148862739	148862838	100	148862752	6	7.54459	5.4134	3.04047	peak1514
chr4	43603114	43603223	110	43603161	6	7.54459	5.4134	3.04047	peak1515
chr4	104040239	104040368	130	104040296	8	7.52624	5.47181	3.04047	peak1516
chr4	128370555	128370658	104	128370586	6	7.54459	5.4134	3.04047	peak1517
chr4	135072958	135073072	115	135073009	6	7.54459	5.4134	3.04047	peak1518
chr4	150030263	150030369	107	150030309	6	7.54459	5.4134	3.04047	peak1519
chr5	30969149	30969277	129	30969235	6	7.54459	5.4134	3.04047	peak1520
chr5	111628146	111628273	128	111628207	6	7.54459	5.4134	3.04047	peak1521
chr5	124562242	124562384	143	124562294	6	7.54459	5.4134	3.04047	peak1522
chr5	137508396	137508493	98	137508420	6	7.54459	5.4134	3.04047	peak1523
chr6	12210860	12210958	99	12210911	6	7.54459	5.4134	3.04047	peak1524
chr6	114876495	114876618	124	114876538	6	7.54459	5.4134	3.04047	peak1525
chr7	4130168	4130285	118	4130189	6	7.54459	5.4134	3.04047	peak1526
chr7	16880201	16880321	121	16880275	6	7.54459	5.4134	3.04047	peak1527
chr7	20277297	20277428	132	20277342	6	7.54459	5.4134	3.04047	peak1528
chr7	84946788	84946885	98	84946830	6	7.54459	5.4134	3.04047	peak1529
chr7	99890250	99890347	98	99890304	6	7.54459	5.4134	3.04047	peak1530
chr8	26269945	26270060	116	26269993	6	7.54459	5.4134	3.04047	peak1531
chr8	26594005	26594114	110	26594036	6	7.54459	5.4134	3.04047	peak1532
chr8	47237100	47237198	99	47237150	8	7.52624	5.47181	3.04047	peak1533
chr8	71642904	71643008	105	71642944	6	7.54459	5.4134	3.04047	peak1534
chr9	64188262	64188359	98	64188297	6	7.54459	5.4134	3.04047	peak1535
chr9	65936360	65936489	130	65936403	6	7.54459	5.4134	3.04047	peak1536
chrX	7476038	7476151	114	7476094	6	7.54459	5.4134	3.04047	peak1537
chrX	106615030	106615127	98	106615089	6	7.54459	5.4134	3.04047	peak1538
chr10	57252072	57252200	129	57252106	6	7.4866	5.38897	3.00563	peak1539
chr11	97560885	97560988	104	97560914	6	7.4866	5.38897	3.00563	peak1540
chr7	36150689	36150811	123	36150752	6	7.4866	5.38897	3.00563	peak1541
chr8	87513017	87513114	98	87513062	6	7.4866	5.38897	3.00563	peak1542
chr2	98502426	98502638	213	98502498	154	7.46881	1.58327	2.98903	peak1543
chr1	135974482	135974640	159	135974560	6	7.42979	5.36476	2.95009	peak1544
chr11	70068884	70069005	122	70068943	6	7.42979	5.36476	2.95009	peak1545
chr15	93426306	93426403	98	93426359	6	7.42979	5.36476	2.95009	peak1546
chr17	86083713	86083812	100	86083762	6	7.42979	5.36476	2.95009	peak1547
chr8	124471463	124471574	112	124471510	6	7.42979	5.36476	2.95009	peak1548
chr1	152240344	152240512	169	152240432	7	7.41712	5.4461	2.93926	peak1549
chr10	13194201	13194329	129	13194269	7	7.41712	5.4461	2.93926	peak1550
chr11	51103073	51103185	113	51103114	7	7.41712	5.4461	2.93926	peak1551
chr11	60692280	60692395	116	60692339	7	7.41712	5.4461	2.93926	peak1552
chr11	102106549	102106646	98	102106582	7	7.41712	5.4461	2.93926	peak1553
chr18	73914050	73914163	114	73914080	7	7.41712	5.4461	2.93926	peak1554
chr3	88754081	88754221	141	88754147	7	7.41712	5.4461	2.93926	peak1555
chr5	143639124	143639221	98	143639163	7	7.41712	5.4461	2.93926	peak1556
chr7	108257085	108257194	110	108257131	7	7.41712	5.4461	2.93926	peak1557
chr11	54601405	54601541	137	54601467	6	7.3741	5.34077	2.89933	peak1558
chr11	23976373	23976503	131	23976416	6	7.31949	5.31699	2.84513	peak1559
chr17	4947204	4947338	135	4947258	6	7.31949	5.31699	2.84513	peak1560
chr9	30938852	30938979	128	30938930	6	7.31949	5.31699	2.84513	peak1561
chr15	36722470	36722577	108	36722538	6	7.26593	5.29342	2.79271	peak1562
chr11	79051563	79051677	115	79051653	10	7.21933	5.00847	2.747	peak1563
chr11	100800619	100800728	110	100800695	10	7.21933	5.00847	2.747	peak1564
chr14	28241993	28242118	126	28242035	10	7.21933	5.00847	2.747	peak1565
chr2	90585541	90585685	145	90585626	10	7.21933	5.00847	2.747	peak1566
chr4	118778557	118778731	175	118778634	10	7.21933	5.00847	2.747	peak1567
chr5	24758847	24759004	158	24758926	10	7.21933	5.00847	2.747	peak1568
chr6	116158253	116158356	104	116158345	10	7.21933	5.00847	2.747	peak1569
chr7	36370520	36370637	118	36370567	8	7.20891	5.28351	2.73923	peak1570
chr5	93234623	93234720	98	93234683	6	7.16178	5.2469	2.69251	peak1571
chr5	115373116	115373244	129	115373181	6	7.11112	5.22395	2.64224	peak1572
chr1	167572669	167572776	108	167572728	7	7.0304	5.23711	2.56194	peak1573
chr11	98603412	98603560	149	98603471	7	7.0304	5.23711	2.56194	peak1574
chr12	66174925	66175022	98	66174963	7	7.0304	5.23711	2.56194	peak1575
chr5	139856365	139856473	109	139856388	7	7.0304	5.23711	2.56194	peak1576
chr1	4483783	4483895	113	4483841	6	7.01249	5.17864	2.5452	peak1577
chr1	135808129	135808226	98	135808185	6	7.01249	5.17864	2.5452	peak1578
chr1	174492842	174492961	120	174492871	6	7.01249	5.17864	2.5452	peak1579
chr1	174493456	174493599	144	174493534	6	7.01249	5.17864	2.5452	peak1580
chr1	177555228	177555325	98	177555276	6	7.01249	5.17864	2.5452	peak1581
chr1	182263407	182263506	100	182263485	6	7.01249	5.17864	2.5452	peak1582
chr10	3166048	3166167	120	3166115	6	7.01249	5.17864	2.5452	peak1583
chr10	80945288	80945396	109	80945343	6	7.01249	5.17864	2.5452	peak1584
chr10	85379368	85379465	98	85379409	6	7.01249	5.17864	2.5452	peak1585
chr10	85961513	85961610	98	85961556	6	7.01249	5.17864	2.5452	peak1586
chr11	19866385	19866497	113	19866447	6	7.01249	5.17864	2.5452	peak1587
chr11	88065859	88065981	123	88065917	6	7.01249	5.17864	2.5452	peak1588
chr11	103194482	103194597	116	103194531	6	7.01249	5.17864	2.5452	peak1589
chr12	8327054	8327151	98	8327076	6	7.01249	5.17864	2.5452	peak1590
chr12	11272902	11273010	109	11272981	6	7.01249	5.17864	2.5452	peak1591
chr12	75008950	75009057	108	75008993	6	7.01249	5.17864	2.5452	peak1592
chr12	84828245	84828342	98	84828296	6	7.01249	5.17864	2.5452	peak1593
chr13	60776405	60776510	106	60776435	6	7.01249	5.17864	2.5452	peak1594
chr14	17596261	17596358	98	17596309	6	7.01249	5.17864	2.5452	peak1595
chr14	76814741	76814875	135	76814807	6	7.01249	5.17864	2.5452	peak1596
chr16	21192794	21192891	98	21192860	6	7.01249	5.17864	2.5452	peak1597
chr17	13896192	13896295	104	13896248	6	7.01249	5.17864	2.5452	peak1598
chr17	23881702	23881805	104	23881758	6	7.01249	5.17864	2.5452	peak1599
chr17	29467681	29467782	102	29467748	6	7.01249	5.17864	2.5452	peak1600
chr17	46167977	46168119	143	46168042	6	7.01249	5.17864	2.5452	peak1601
chr17	56175936	56176038	103	56175968	6	7.01249	5.17864	2.5452	peak1602
chr17	56412001	56412102	102	56412036	6	7.01249	5.17864	2.5452	peak1603
chr17	73267414	73267568	155	73267510	6	7.01249	5.17864	2.5452	peak1604
chr18	3507718	3507815	98	3507757	6	7.01249	5.17864	2.5452	peak1605
chr18	70085113	70085210	98	70085131	6	7.01249	5.17864	2.5452	peak1606
chr18	73975039	73975140	102	73975095	6	7.01249	5.17864	2.5452	peak1607
chr19	5729711	5729822	112	5729747	6	7.01249	5.17864	2.5452	peak1608
chr19	36628972	36629129	158	36629050	6	7.01249	5.17864	2.5452	peak1609
chr2	12222630	12222731	102	12222655	6	7.01249	5.17864	2.5452	peak1610
chr2	21183391	21183498	108	21183450	6	7.01249	5.17864	2.5452	peak1611
chr2	25212432	25212533	102	25212476	6	7.01249	5.17864	2.5452	peak1612
chr2	33216265	33216362	98	33216289	6	7.01249	5.17864	2.5452	peak1613
chr2	45040534	45040631	98	45040586	6	7.01249	5.17864	2.5452	peak1614
chr2	113280908	113281007	100	113280942	6	7.01249	5.17864	2.5452	peak1615
chr2	173563016	173563130	115	173563103	6	7.01249	5.17864	2.5452	peak1616
chr3	35223261	35223365	105	35223300	6	7.01249	5.17864	2.5452	peak1617
chr4	35083931	35084028	98	35083985	6	7.01249	5.17864	2.5452	peak1618
chr4	59286384	59286515	132	59286458	6	7.01249	5.17864	2.5452	peak1619
chr4	61947554	61947658	105	61947602	6	7.01249	5.17864	2.5452	peak1620
chr4	120770536	120770665	130	120770593	6	7.01249	5.17864	2.5452	peak1621
chr4	127764362	127764471	110	127764409	6	7.01249	5.17864	2.5452	peak1622
chr4	137663744	137663841	98	137663789	6	7.01249	5.17864	2.5452	peak1623
chr4	144550597	144550715	119	144550632	6	7.01249	5.17864	2.5452	peak1624
chr4	154460066	154460235	170	154460153	6	7.01249	5.17864	2.5452	peak1625
chr5	5514748	5514854	107	5514802	6	7.01249	5.17864	2.5452	peak1626
chr5	104164572	104164691	120	104164647	6	7.01249	5.17864	2.5452	peak1627
chr5	125483760	125483861	102	125483809	6	7.01249	5.17864	2.5452	peak1628
chr5	140027962	140028096	135	140028021	6	7.01249	5.17864	2.5452	peak1629
chr6	99854184	99854333	150	99854243	6	7.01249	5.17864	2.5452	peak1630
chr6	126532028	126532139	112	126532076	6	7.01249	5.17864	2.5452	peak1631
chr6	127717985	127718082	98	127718028	6	7.01249	5.17864	2.5452	peak1632
chr7	31385048	31385170	123	31385085	6	7.01249	5.17864	2.5452	peak1633
chr7	46807636	46807733	98	46807656	6	7.01249	5.17864	2.5452	peak1634
chr7	73984396	73984493	98	73984459	6	7.01249	5.17864	2.5452	peak1635
chr7	106616736	106616863	128	106616810	6	7.01249	5.17864	2.5452	peak1636
chr8	34756472	34756571	100	34756501	6	7.01249	5.17864	2.5452	peak1637
chr8	77557522	77557625	104	77557580	6	7.01249	5.17864	2.5452	peak1638
chr8	120060950	120061072	123	120060996	6	7.01249	5.17864	2.5452	peak1639
chr8	122425427	122425565	139	122425496	6	7.01249	5.17864	2.5452	peak1640
chr9	21229594	21229691	98	21229657	6	7.01249	5.17864	2.5452	peak1641
chr9	106295030	106295136	107	106295058	6	7.01249	5.17864	2.5452	peak1642
chr9	122203912	122204009	98	122203956	6	7.01249	5.17864	2.5452	peak1643
chr13	54795574	54795680	107	54795633	8	6.9188	5.10775	2.46861	peak1644
chr12	20236226	20236324	99	20236283	6	6.87082	5.11213	2.42108	peak1645
chr1	4401769	4401866	98	4401835	5	6.66173	4.83741	2.42067	peak1646
chr1	4959878	4959975	98	4959911	5	6.87018	4.91298	2.42067	peak1647
chr1	5073125	5073250	126	5073215	5	6.87018	4.91298	2.42067	peak1648
chr1	5892775	5892872	98	5892828	5	6.87018	4.91298	2.42067	peak1649
chr1	6507635	6507732	98	6507672	5	6.87018	4.91298	2.42067	peak1650
chr1	6600217	6600314	98	6600244	5	6.87018	4.91298	2.42067	peak1651
chr1	10223423	10223520	98	10223477	5	6.7239	4.86038	2.42067	peak1652
chr1	13141310	13141407	98	13141330	5	6.7239	4.86038	2.42067	peak1653
chr1	16655451	16655548	98	16655471	5	6.87018	4.91298	2.42067	peak1654
chr1	18292948	18293045	98	18292996	5	6.87018	4.91298	2.42067	peak1655
chr1	21401413	21401510	98	21401456	5	6.87018	4.91298	2.42067	peak1656
chr1	22560323	22560420	98	22560360	5	6.87018	4.91298	2.42067	peak1657
chr1	23799765	23799862	98	23799796	5	6.87018	4.91298	2.42067	peak1658
chr1	24821944	24822041	98	24822008	5	6.87018	4.91298	2.42067	peak1659
chr1	28003449	28003546	98	28003512	5	6.87018	4.91298	2.42067	peak1660
chr1	29592256	29592354	99	29592282	5	6.7239	4.86038	2.42067	peak1661
chr1	32207241	32207342	102	32207285	5	6.87018	4.91298	2.42067	peak1662
chr1	33663689	33663798	110	33663723	5	6.87018	4.91298	2.42067	peak1663
chr1	35831860	35831957	98	35831908	5	6.87018	4.91298	2.42067	peak1664
chr1	36121927	36122027	101	36121948	5	6.60111	4.81466	2.42067	peak1665
chr1	36185906	36186006	101	36186000	5	6.85321	4.90698	2.42067	peak1666
chr1	36741110	36741207	98	36741177	5	6.87018	4.91298	2.42067	peak1667
chr1	36809562	36809659	98	36809640	5	6.87018	4.91298	2.42067	peak1668
chr1	37124597	37124694	98	37124656	5	6.66173	4.83741	2.42067	peak1669
chr1	40223951	40224048	98	40223979	5	6.87018	4.91298	2.42067	peak1670
chr1	41022591	41022729	139	41022657	5	6.87018	4.91298	2.42067	peak1671
chr1	43294251	43294348	98	43294325	5	6.87018	4.91298	2.42067	peak1672
chr1	44204743	44204840	98	44204810	7	6.68682	5.04358	2.42067	peak1673
chr1	55938681	55938791	111	55938767	5	6.87018	4.91298	2.42067	peak1674
chr1	58364086	58364192	107	58364123	5	6.87018	4.91298	2.42067	peak1675
chr1	60666344	60666452	109	60666380	5	6.87018	4.91298	2.42067	peak1676
chr1	63069503	63069600	98	63069555	5	6.87018	4.91298	2.42067	peak1677
chr1	64051594	64051691	98	64051638	5	6.87018	4.91298	2.42067	peak1678
chr1	65486911	65487012	102	65486970	7	6.62122	5.00582	2.42067	peak1679
chr1	66173367	66173464	98	66173390	5	6.87018	4.91298	2.42067	peak1680
chr1	66424816	66424913	98	66424880	5	6.87018	4.91298	2.42067	peak1681
chr1	67047245	67047342	98	67047306	5	6.85321	4.90698	2.42067	peak1682
chr1	67429572	67429669	98	67429615	5	6.87018	4.91298	2.42067	peak1683
chr1	69836997	69837094	98	69837026	5	6.87018	4.91298	2.42067	peak1684
chr1	71517565	71517662	98	71517656	5	6.87018	4.91298	2.42067	peak1685
chr1	73909521	73909618	98	73909558	5	6.87018	4.91298	2.42067	peak1686
chr1	74901645	74901824	180	74901682	7	6.62122	5.00582	2.42067	peak1687
chr1	75174015	75174112	98	75174064	5	6.87018	4.91298	2.42067	peak1688
chr1	76418234	76418331	98	76418292	5	6.87018	4.91298	2.42067	peak1689
chr1	77814660	77814793	134	77814696	5	6.87018	4.91298	2.42067	peak1690
chr1	77924617	77924714	98	77924696	5	6.87018	4.91298	2.42067	peak1691
chr1	80699846	80699943	98	80699896	5	6.87018	4.91298	2.42067	peak1692
chr1	83832805	83832902	98	83832845	5	6.87018	4.91298	2.42067	peak1693
chr1	88255636	88255823	188	88255681	5	6.87018	4.91298	2.42067	peak1694
chr1	90654458	90654576	119	90654509	5	6.60111	4.81466	2.42067	peak1695
chr1	90912258	90912355	98	90912300	5	6.7239	4.86038	2.42067	peak1696
chr1	91087716	91087818	103	91087771	7	6.62122	5.00582	2.42067	peak1697
chr1	91862113	91862210	98	91862129	5	6.7877	4.88357	2.42067	peak1698
chr1	92896065	92896180	116	92896125	5	6.87018	4.91298	2.42067	peak1699
chr1	93352898	93352995	98	93352954	5	6.87018	4.91298	2.42067	peak1700
chr1	95408972	95409147	176	95409057	5	6.7239	4.86038	2.42067	peak1701
chr1	96633904	96634005	102	96633929	5	6.7239	4.86038	2.42067	peak1702
chr1	103748132	103748229	98	103748141	5	6.87018	4.91298	2.42067	peak1703
chr1	106523371	106523468	98	106523451	5	6.87018	4.91298	2.42067	peak1704
chr1	116763041	116763138	98	116763079	5	6.87018	4.91298	2.42067	peak1705
chr1	118468879	118468976	98	118468925	5	6.87018	4.91298	2.42067	peak1706
chr1	120662204	120662348	145	120662279	5	6.87018	4.91298	2.42067	peak1707
chr1	120891120	120891258	139	120891209	5	6.87018	4.91298	2.42067	peak1708
chr1	121375166	121375263	98	121375218	5	6.87018	4.91298	2.42067	peak1709
chr1	123224441	123224538	98	123224484	5	6.87018	4.91298	2.42067	peak1710
chr1	123327554	123327651	98	123327594	5	6.7239	4.86038	2.42067	peak1711
chr1	125039882	125039979	98	125039936	5	6.87018	4.91298	2.42067	peak1712
chr1	128974612	128974709	98	128974661	5	6.85321	4.90698	2.42067	peak1713
chr1	130800830	130800927	98	130800879	5	6.87018	4.91298	2.42067	peak1714
chr1	132408522	132408619	98	132408560	5	6.7239	4.86038	2.42067	peak1715
chr1	133627303	133627400	98	133627380	5	6.87018	4.91298	2.42067	peak1716
chr1	133905579	133905676	98	133905619	5	6.87018	4.91298	2.42067	peak1717
chr1	134194074	134194171	98	134194165	5	6.87018	4.91298	2.42067	peak1718
chr1	134334974	134335071	98	134335043	5	6.87018	4.91298	2.42067	peak1719
chr1	135101332	135101429	98	135101368	5	6.7239	4.86038	2.42067	peak1720
chr1	136073142	136073239	98	136073206	5	6.87018	4.91298	2.42067	peak1721
chr1	136102680	136102777	98	136102738	5	6.60111	4.81466	2.42067	peak1722
chr1	136788693	136788790	98	136788751	5	6.87018	4.91298	2.42067	peak1723
chr1	137044046	137044164	119	137044098	5	6.87018	4.91298	2.42067	peak1724
chr1	137182563	137182660	98	137182597	5	6.87018	4.91298	2.42067	peak1725
chr1	147213108	147213205	98	147213151	5	6.87018	4.91298	2.42067	peak1726
chr1	153317558	153317655	98	153317619	5	6.87018	4.91298	2.42067	peak1727
chr1	153347364	153347461	98	153347424	5	6.7239	4.86038	2.42067	peak1728
chr1	156677327	156677424	98	156677395	5	6.87018	4.91298	2.42067	peak1729
chr1	157274837	157274934	98	157274884	5	6.87018	4.91298	2.42067	peak1730
chr1	157660176	157660282	107	157660206	5	6.87018	4.91298	2.42067	peak1731
chr1	158978819	158978926	108	158978903	5	6.87018	4.91298	2.42067	peak1732
chr1	159388594	159388691	98	159388618	5	6.7239	4.86038	2.42067	peak1733
chr1	160286881	160286978	98	160286898	5	6.87018	4.91298	2.42067	peak1734
chr1	161967174	161967271	98	161967209	5	6.87018	4.91298	2.42067	peak1735
chr1	164539930	164540027	98	164539962	5	6.87018	4.91298	2.42067	peak1736
chr1	166659894	166659991	98	166659913	5	6.87018	4.91298	2.42067	peak1737
chr1	166675659	166675756	98	166675677	5	6.87018	4.91298	2.42067	peak1738
chr1	167564404	167564501	98	167564467	5	6.7877	4.88357	2.42067	peak1739
chr1	174136782	174136879	98	174136810	5	6.87018	4.91298	2.42067	peak1740
chr1	179273385	179273482	98	179273423	5	6.7877	4.88357	2.42067	peak1741
chr1	179389088	179389289	202	179389145	7	6.62122	5.00582	2.42067	peak1742
chr1	180023040	180023137	98	180023080	5	6.87018	4.91298	2.42067	peak1743
chr1	180481134	180481231	98	180481212	5	6.87018	4.91298	2.42067	peak1744
chr1	180515958	180516055	98	180515978	5	6.87018	4.91298	2.42067	peak1745
chr1	182159749	182159898	150	182159828	5	6.87018	4.91298	2.42067	peak1746
chr1	182317803	182317900	98	182317865	5	6.60111	4.81466	2.42067	peak1747
chr1	182550710	182550807	98	182550765	5	6.7877	4.88357	2.42067	peak1748
chr1	182918068	182918189	122	182918110	5	6.60111	4.81466	2.42067	peak1749
chr1	183819104	183819201	98	183819133	7	6.62122	5.00582	2.42067	peak1750
chr1	184425240	184425337	98	184425259	5	6.87018	4.91298	2.42067	peak1751
chr1	184534142	184534286	145	184534199	5	6.85321	4.90698	2.42067	peak1752
chr1	186653828	186653925	98	186653889	5	6.87018	4.91298	2.42067	peak1753
chr1	192868038	192868135	98	192868077	5	6.85321	4.90698	2.42067	peak1754
chr1	193141865	193141962	98	193141931	5	6.87018	4.91298	2.42067	peak1755
chr1	193228578	193228675	98	193228639	5	6.87018	4.91298	2.42067	peak1756
chr1	193645667	193645812	146	193645728	5	6.66173	4.83741	2.42067	peak1757
chr1	195132266	195132363	98	195132351	5	6.66173	4.83741	2.42067	peak1758
chr1	195919135	195919232	98	195919218	5	6.87018	4.91298	2.42067	peak1759
chr1	196300802	196300899	98	196300853	5	6.87018	4.91298	2.42067	peak1760
chr1	196445952	196446225	274	196446160	5	6.7239	4.86038	2.42067	peak1761
chr10	3205938	3206057	120	3205978	5	6.87018	4.91298	2.42067	peak1762
chr10	3506676	3506773	98	3506717	5	6.87018	4.91298	2.42067	peak1763
chr10	5144409	5144537	129	5144471	5	6.87018	4.91298	2.42067	peak1764
chr10	6896424	6896521	98	6896480	5	6.87018	4.91298	2.42067	peak1765
chr10	8722086	8722183	98	8722103	5	6.87018	4.91298	2.42067	peak1766
chr10	12332442	12332539	98	12332511	5	6.87018	4.91298	2.42067	peak1767
chr10	19750741	19750838	98	19750784	5	6.87018	4.91298	2.42067	peak1768
chr10	20261124	20261221	98	20261148	5	6.7239	4.86038	2.42067	peak1769
chr10	22588624	22588721	98	22588669	5	6.87018	4.91298	2.42067	peak1770
chr10	24381118	24381215	98	24381175	5	6.87018	4.91298	2.42067	peak1771
chr10	25226022	25226119	98	25226067	5	6.87018	4.91298	2.42067	peak1772
chr10	26855451	26855548	98	26855469	5	6.87018	4.91298	2.42067	peak1773
chr10	27013492	27013589	98	27013543	5	6.87018	4.91298	2.42067	peak1774
chr10	27753524	27753621	98	27753585	5	6.87018	4.91298	2.42067	peak1775
chr10	29033241	29033409	169	29033326	5	6.87018	4.91298	2.42067	peak1776
chr10	31204614	31204711	98	31204684	5	6.87018	4.91298	2.42067	peak1777
chr10	34138451	34138550	100	34138501	5	6.87018	4.91298	2.42067	peak1778
chr10	34964830	34964927	98	34964850	5	6.87018	4.91298	2.42067	peak1779
chr10	34981719	34981816	98	34981790	5	6.87018	4.91298	2.42067	peak1780
chr10	36540254	36540351	98	36540281	5	6.87018	4.91298	2.42067	peak1781
chr10	37861257	37861354	98	37861290	5	6.87018	4.91298	2.42067	peak1782
chr10	38986503	38986600	98	38986550	5	6.85321	4.90698	2.42067	peak1783
chr10	39384875	39384972	98	39384916	5	6.87018	4.91298	2.42067	peak1784
chr10	40253906	40254003	98	40253944	5	6.7239	4.86038	2.42067	peak1785
chr10	42838211	42838308	98	42838263	5	6.7239	4.86038	2.42067	peak1786
chr10	43003017	43003114	98	43003061	5	6.7239	4.86038	2.42067	peak1787
chr10	43256472	43256569	98	43256496	5	6.7877	4.88357	2.42067	peak1788
chr10	43746515	43746612	98	43746564	5	6.7877	4.88357	2.42067	peak1789
chr10	51674106	51674203	98	51674172	5	6.87018	4.91298	2.42067	peak1790
chr10	51685602	51685699	98	51685663	5	6.7239	4.86038	2.42067	peak1791
chr10	56558909	56559006	98	56558947	5	6.7239	4.86038	2.42067	peak1792
chr10	58892974	58893071	98	58892996	5	6.87018	4.91298	2.42067	peak1793
chr10	59355832	59355941	110	59355861	5	6.87018	4.91298	2.42067	peak1794
chr10	59379084	59379205	122	59379166	5	6.87018	4.91298	2.42067	peak1795
chr10	59610911	59611008	98	59610952	5	6.7239	4.86038	2.42067	peak1796
chr10	59768167	59768264	98	59768210	5	6.87018	4.91298	2.42067	peak1797
chr10	59925880	59925977	98	59925920	5	6.87018	4.91298	2.42067	peak1798
chr10	60249445	60249542	98	60249520	5	6.87018	4.91298	2.42067	peak1799
chr10	61054114	61054245	132	61054165	5	6.87018	4.91298	2.42067	peak1800
chr10	62706328	62706454	127	62706379	5	6.7239	4.86038	2.42067	peak1801
chr10	66028528	66028625	98	66028568	5	6.87018	4.91298	2.42067	peak1802
chr10	66372074	66372177	104	66372085	5	6.87018	4.91298	2.42067	peak1803
chr10	66569656	66569753	98	66569709	5	6.87018	4.91298	2.42067	peak1804
chr10	66717983	66718080	98	66718002	5	6.87018	4.91298	2.42067	peak1805
chr10	66748194	66748294	101	66748223	7	6.62122	5.00582	2.42067	peak1806
chr10	67321790	67321887	98	67321857	5	6.87018	4.91298	2.42067	peak1807
chr10	69119213	69119339	127	69119260	5	6.87018	4.91298	2.42067	peak1808
chr10	70810374	70810480	107	70810428	7	6.68682	5.04358	2.42067	peak1809
chr10	75345087	75345184	98	75345098	5	6.87018	4.91298	2.42067	peak1810
chr10	75666857	75666954	98	75666895	5	6.87018	4.91298	2.42067	peak1811
chr10	75931572	75931669	98	75931650	5	6.7239	4.86038	2.42067	peak1812
chr10	76609561	76609667	107	76609602	5	6.7239	4.86038	2.42067	peak1813
chr10	76686187	76686290	104	76686233	5	6.87018	4.91298	2.42067	peak1814
chr10	77722573	77722670	98	77722641	5	6.7239	4.86038	2.42067	peak1815
chr10	78691154	78691251	98	78691208	5	6.87018	4.91298	2.42067	peak1816
chr10	80066836	80066933	98	80066871	5	6.87018	4.91298	2.42067	peak1817
chr10	80218171	80218269	99	80218196	5	6.7239	4.86038	2.42067	peak1818
chr10	80706617	80706751	135	80706696	5	6.66173	4.83741	2.42067	peak1819
chr10	80841300	80841397	98	80841330	5	6.87018	4.91298	2.42067	peak1820
chr10	81817184	81817294	111	81817208	5	6.87018	4.91298	2.42067	peak1821
chr10	82798296	82798393	98	82798321	5	6.87018	4.91298	2.42067	peak1822
chr10	85114539	85114667	129	85114610	5	6.87018	4.91298	2.42067	peak1823
chr10	85292699	85292823	125	85292758	5	6.87018	4.91298	2.42067	peak1824
chr10	86700199	86700296	98	86700216	5	6.87018	4.91298	2.42067	peak1825
chr10	89194953	89195066	114	89195038	5	6.87018	4.91298	2.42067	peak1826
chr10	89345120	89345274	155	89345207	5	6.87018	4.91298	2.42067	peak1827
chr10	93225918	93226015	98	93225965	5	6.87018	4.91298	2.42067	peak1828
chr10	93281515	93281612	98	93281574	5	6.7239	4.86038	2.42067	peak1829
chr10	93958677	93958806	130	93958722	5	6.87018	4.91298	2.42067	peak1830
chr10	94202406	94202503	98	94202453	5	6.7239	4.86038	2.42067	peak1831
chr10	95823939	95824036	98	95823977	5	6.87018	4.91298	2.42067	peak1832
chr10	97678025	97678122	98	97678067	5	6.87018	4.91298	2.42067	peak1833
chr10	98933052	98933157	106	98933143	5	6.87018	4.91298	2.42067	peak1834
chr10	105278392	105278489	98	105278431	7	6.62122	5.00582	2.42067	peak1835
chr10	107241410	107241507	98	107241448	5	6.87018	4.91298	2.42067	peak1836
chr10	109357933	109358030	98	109357957	5	6.87018	4.91298	2.42067	peak1837
chr10	110112732	110112829	98	110112779	5	6.87018	4.91298	2.42067	peak1838
chr10	110231722	110231819	98	110231766	5	6.7239	4.86038	2.42067	peak1839
chr10	114664023	114664120	98	114664079	5	6.7239	4.86038	2.42067	peak1840
chr10	115509714	115509811	98	115509757	5	6.87018	4.91298	2.42067	peak1841
chr10	115704028	115704125	98	115704123	5	6.87018	4.91298	2.42067	peak1842
chr10	117148709	117148806	98	117148779	5	6.87018	4.91298	2.42067	peak1843
chr10	118907277	118907374	98	118907303	5	6.87018	4.91298	2.42067	peak1844
chr10	119925044	119925141	98	119925117	5	6.87018	4.91298	2.42067	peak1845
chr10	121823056	121823153	98	121823061	5	6.87018	4.91298	2.42067	peak1846
chr10	122513230	122513340	111	122513264	5	6.87018	4.91298	2.42067	peak1847
chr10	126587846	126587943	98	126587907	5	6.87018	4.91298	2.42067	peak1848
chr10	127816313	127816410	98	127816341	5	6.87018	4.91298	2.42067	peak1849
chr10	128240872	128240986	115	128240930	5	6.7239	4.86038	2.42067	peak1850
chr11	3269606	3269703	98	3269639	5	6.66173	4.83741	2.42067	peak1851
chr11	4167001	4167116	116	4167042	7	6.62122	5.00582	2.42067	peak1852
chr11	6406616	6406762	147	6406705	5	6.87018	4.91298	2.42067	peak1853
chr11	6573939	6574047	109	6574019	5	6.7877	4.88357	2.42067	peak1854
chr11	6630155	6630252	98	6630176	5	6.87018	4.91298	2.42067	peak1855
chr11	8135002	8135099	98	8135030	5	6.87018	4.91298	2.42067	peak1856
chr11	8140459	8140556	98	8140486	5	6.87018	4.91298	2.42067	peak1857
chr11	8479192	8479289	98	8479224	5	6.87018	4.91298	2.42067	peak1858
chr11	17180014	17180111	98	17180055	5	6.87018	4.91298	2.42067	peak1859
chr11	18832467	18832564	98	18832503	5	6.87018	4.91298	2.42067	peak1860
chr11	18949396	18949493	98	18949435	5	6.66173	4.83741	2.42067	peak1861
chr11	20355162	20355259	98	20355210	5	6.7877	4.88357	2.42067	peak1862
chr11	21103602	21103699	98	21103653	5	6.7239	4.86038	2.42067	peak1863
chr11	22759362	22759480	119	22759411	5	6.87018	4.91298	2.42067	peak1864
chr11	22882196	22882362	167	22882332	5	6.87018	4.91298	2.42067	peak1865
chr11	24813649	24813746	98	24813674	5	6.87018	4.91298	2.42067	peak1866
chr11	32082641	32082744	104	32082682	5	6.87018	4.91298	2.42067	peak1867
chr11	32096712	32096809	98	32096733	5	6.87018	4.91298	2.42067	peak1868
chr11	32355081	32355178	98	32355127	5	6.87018	4.91298	2.42067	peak1869
chr11	32501902	32502106	205	32501965	5	6.87018	4.91298	2.42067	peak1870
chr11	33742074	33742171	98	33742103	5	6.87018	4.91298	2.42067	peak1871
chr11	35221224	35221321	98	35221275	5	6.87018	4.91298	2.42067	peak1872
chr11	40568894	40568991	98	40568953	5	6.87018	4.91298	2.42067	peak1873
chr11	41675959	41676056	98	41676050	5	6.87018	4.91298	2.42067	peak1874
chr11	44621132	44621279	148	44621191	5	6.87018	4.91298	2.42067	peak1875
chr11	45740295	45740392	98	45740356	5	6.7239	4.86038	2.42067	peak1876
chr11	45768709	45768808	100	45768803	5	6.87018	4.91298	2.42067	peak1877
chr11	45941013	45941110	98	45941054	5	6.87018	4.91298	2.42067	peak1878
chr11	47044827	47044924	98	47044857	5	6.87018	4.91298	2.42067	peak1879
chr11	47341414	47341511	98	47341451	5	6.87018	4.91298	2.42067	peak1880
chr11	47802090	47802187	98	47802137	5	6.7877	4.88357	2.42067	peak1881
chr11	48570387	48570484	98	48570469	5	6.7239	4.86038	2.42067	peak1882
chr11	50400661	50400758	98	50400718	5	6.7239	4.86038	2.42067	peak1883
chr11	50753549	50753646	98	50753587	5	6.7239	4.86038	2.42067	peak1884
chr11	51421204	51421309	106	51421217	5	6.7877	4.88357	2.42067	peak1885
chr11	51682432	51682529	98	51682496	5	6.87018	4.91298	2.42067	peak1886
chr11	55421387	55421484	98	55421442	5	6.60111	4.81466	2.42067	peak1887
chr11	56910932	56911029	98	56910967	5	6.87018	4.91298	2.42067	peak1888
chr11	59198736	59198833	98	59198781	5	6.87018	4.91298	2.42067	peak1889
chr11	59339550	59339647	98	59339617	5	6.60111	4.81466	2.42067	peak1890
chr11	59431618	59431715	98	59431649	5	6.87018	4.91298	2.42067	peak1891
chr11	60007328	60007461	134	60007389	5	6.7239	4.86038	2.42067	peak1892
chr11	60753976	60754073	98	60754016	5	6.87018	4.91298	2.42067	peak1893
chr11	61318289	61318397	109	61318366	5	6.7239	4.86038	2.42067	peak1894
chr11	61343098	61343195	98	61343121	5	6.87018	4.91298	2.42067	peak1895
chr11	62075956	62076053	98	62076005	5	6.87018	4.91298	2.42067	peak1896
chr11	63218296	63218393	98	63218350	5	6.7239	4.86038	2.42067	peak1897
chr11	63351733	63351830	98	63351752	5	6.87018	4.91298	2.42067	peak1898
chr11	63891542	63891639	98	63891565	5	6.87018	4.91298	2.42067	peak1899
chr11	69779123	69779220	98	69779167	7	6.68682	5.04358	2.42067	peak1900
chr11	70482814	70482924	111	70482885	7	6.62122	5.00582	2.42067	peak1901
chr11	71810282	71810396	115	71810342	5	6.87018	4.91298	2.42067	peak1902
chr11	72820030	72820205	176	72820110	5	6.87018	4.91298	2.42067	peak1903
chr11	74364278	74364375	98	74364320	5	6.7239	4.86038	2.42067	peak1904
chr11	75467511	75467637	127	75467602	5	6.85321	4.90698	2.42067	peak1905
chr11	76759788	76759885	98	76759842	5	6.7877	4.88357	2.42067	peak1906
chr11	78279012	78279109	98	78279062	5	6.87018	4.91298	2.42067	peak1907
chr11	78959921	78960019	99	78959966	5	6.87018	4.91298	2.42067	peak1908
chr11	79027586	79027696	111	79027625	7	6.62122	5.00582	2.42067	peak1909
chr11	79051996	79052093	98	79052038	5	6.7239	4.86038	2.42067	peak1910
chr11	79404287	79404384	98	79404347	5	6.87018	4.91298	2.42067	peak1911
chr11	79518064	79518166	103	79518108	7	6.62122	5.00582	2.42067	peak1912
chr11	81712492	81712589	98	81712516	5	6.87018	4.91298	2.42067	peak1913
chr11	83370170	83370305	136	83370241	5	6.7239	4.86038	2.42067	peak1914
chr11	86320454	86320551	98	86320468	5	6.7239	4.86038	2.42067	peak1915
chr11	86399892	86399989	98	86399915	5	6.66173	4.83741	2.42067	peak1916
chr11	87040072	87040223	152	87040161	5	6.87018	4.91298	2.42067	peak1917
chr11	87969107	87969215	109	87969184	5	6.87018	4.91298	2.42067	peak1918
chr11	88684510	88684607	98	88684538	5	6.66173	4.83741	2.42067	peak1919
chr11	89087701	89087798	98	89087750	5	6.87018	4.91298	2.42067	peak1920
chr11	89489147	89489244	98	89489196	5	6.87018	4.91298	2.42067	peak1921
chr11	90243517	90243660	144	90243595	5	6.60111	4.81466	2.42067	peak1922
chr11	90252147	90252244	98	90252226	5	6.87018	4.91298	2.42067	peak1923
chr11	90774830	90774927	98	90774850	5	6.87018	4.91298	2.42067	peak1924
chr11	92438297	92438394	98	92438330	5	6.87018	4.91298	2.42067	peak1925
chr11	93332100	93332197	98	93332167	5	6.87018	4.91298	2.42067	peak1926
chr11	93415323	93415420	98	93415363	5	6.87018	4.91298	2.42067	peak1927
chr11	94797397	94797494	98	94797458	5	6.7239	4.86038	2.42067	peak1928
chr11	95395220	95395317	98	95395264	5	6.87018	4.91298	2.42067	peak1929
chr11	95737781	95737878	98	95737837	5	6.87018	4.91298	2.42067	peak1930
chr11	95827588	95827685	98	95827623	5	6.85321	4.90698	2.42067	peak1931
chr11	96680483	96680591	109	96680509	5	6.87018	4.91298	2.42067	peak1932
chr11	96934006	96934103	98	96934010	5	6.87018	4.91298	2.42067	peak1933
chr11	98219837	98219934	98	98219874	5	6.87018	4.91298	2.42067	peak1934
chr11	102273148	102273304	157	102273232	7	6.62122	5.00582	2.42067	peak1935
chr11	103671153	103671310	158	103671223	5	6.87018	4.91298	2.42067	peak1936
chr11	104457880	104457979	100	104457908	5	6.87018	4.91298	2.42067	peak1937
chr11	105014788	105014885	98	105014874	5	6.87018	4.91298	2.42067	peak1938
chr11	105805748	105805845	98	105805770	5	6.87018	4.91298	2.42067	peak1939
chr11	105979779	105979889	111	105979863	5	6.87018	4.91298	2.42067	peak1940
chr11	106474221	106474402	182	106474271	5	6.87018	4.91298	2.42067	peak1941
chr11	107073333	107073430	98	107073347	5	6.87018	4.91298	2.42067	peak1942
chr11	109309624	109309721	98	109309711	5	6.7239	4.86038	2.42067	peak1943
chr11	113559348	113559445	98	113559358	5	6.87018	4.91298	2.42067	peak1944
chr11	115965451	115965548	98	115965508	5	6.87018	4.91298	2.42067	peak1945
chr11	116034182	116034279	98	116034263	5	6.87018	4.91298	2.42067	peak1946
chr11	116441715	116441812	98	116441760	5	6.87018	4.91298	2.42067	peak1947
chr11	116553322	116553419	98	116553369	5	6.7239	4.86038	2.42067	peak1948
chr11	116855392	116855608	217	116855439	5	6.87018	4.91298	2.42067	peak1949
chr11	117106737	117106834	98	117106778	5	6.85321	4.90698	2.42067	peak1950
chr11	117743328	117743480	153	117743390	5	6.87018	4.91298	2.42067	peak1951
chr11	118092840	118092965	126	118092892	5	6.66173	4.83741	2.42067	peak1952
chr11	119708556	119708653	98	119708619	5	6.87018	4.91298	2.42067	peak1953
chr11	120124053	120124150	98	120124095	5	6.66173	4.83741	2.42067	peak1954
chr11	120163271	120163368	98	120163313	5	6.87018	4.91298	2.42067	peak1955
chr11	120685759	120685856	98	120685814	5	6.66173	4.83741	2.42067	peak1956
chr11	120767874	120767983	110	120767895	5	6.87018	4.91298	2.42067	peak1957
chr12	3427528	3427642	115	3427606	5	6.87018	4.91298	2.42067	peak1958
chr12	4133006	4133138	133	4133067	5	6.87018	4.91298	2.42067	peak1959
chr12	4555565	4555705	141	4555630	5	6.66173	4.83741	2.42067	peak1960
chr12	5282643	5282740	98	5282705	5	6.7239	4.86038	2.42067	peak1961
chr12	5324083	5324182	100	5324158	5	6.87018	4.91298	2.42067	peak1962
chr12	8258614	8258716	103	8258684	5	6.87018	4.91298	2.42067	peak1963
chr12	8439262	8439473	212	8439430	5	6.7239	4.86038	2.42067	peak1964
chr12	9037077	9037174	98	9037156	5	6.7239	4.86038	2.42067	peak1965
chr12	10912025	10912122	98	10912068	5	6.87018	4.91298	2.42067	peak1966
chr12	11272599	11272727	129	11272640	7	6.62122	5.00582	2.42067	peak1967
chr12	11357201	11357298	98	11357265	5	6.7239	4.86038	2.42067	peak1968
chr12	14577159	14577256	98	14577216	5	6.87018	4.91298	2.42067	peak1969
chr12	16519356	16519453	98	16519420	5	6.87018	4.91298	2.42067	peak1970
chr12	17260032	17260129	98	17260099	5	6.87018	4.91298	2.42067	peak1971
chr12	17561073	17561172	100	17561106	7	6.62122	5.00582	2.42067	peak1972
chr12	17888873	17888970	98	17888922	5	6.87018	4.91298	2.42067	peak1973
chr12	21240760	21240857	98	21240780	5	6.87018	4.91298	2.42067	peak1974
chr12	21325735	21325869	135	21325785	5	6.87018	4.91298	2.42067	peak1975
chr12	29044046	29044160	115	29044093	5	6.7877	4.88357	2.42067	peak1976
chr12	29382094	29382202	109	29382110	5	6.87018	4.91298	2.42067	peak1977
chr12	29827093	29827201	109	29827152	5	6.7239	4.86038	2.42067	peak1978
chr12	30537989	30538086	98	30538039	5	6.87018	4.91298	2.42067	peak1979
chr12	32634268	32634475	208	32634358	5	6.7239	4.86038	2.42067	peak1980
chr12	37108377	37108474	98	37108426	5	6.7239	4.86038	2.42067	peak1981
chr12	49506574	49506671	98	49506620	5	6.7239	4.86038	2.42067	peak1982
chr12	55647387	55647484	98	55647441	5	6.87018	4.91298	2.42067	peak1983
chr12	56937552	56937649	98	56937605	5	6.87018	4.91298	2.42067	peak1984
chr12	69958264	69958361	98	69958323	5	6.87018	4.91298	2.42067	peak1985
chr12	71553992	71554126	135	71554082	5	6.87018	4.91298	2.42067	peak1986
chr12	72678540	72678681	142	72678589	5	6.87018	4.91298	2.42067	peak1987
chr12	74264337	74264434	98	74264367	5	6.7239	4.86038	2.42067	peak1988
chr12	74866401	74866498	98	74866440	5	6.87018	4.91298	2.42067	peak1989
chr12	74895473	74895570	98	74895530	5	6.87018	4.91298	2.42067	peak1990
chr12	75050843	75051012	170	75050937	7	6.62122	5.00582	2.42067	peak1991
chr12	76285549	76285646	98	76285605	5	6.87018	4.91298	2.42067	peak1992
chr12	78700102	78700316	215	78700178	5	6.87018	4.91298	2.42067	peak1993
chr12	79190858	79190955	98	79190913	5	6.87018	4.91298	2.42067	peak1994
chr12	82332524	82332621	98	82332554	5	6.87018	4.91298	2.42067	peak1995
chr12	85964944	85965041	98	85964984	5	6.87018	4.91298	2.42067	peak1996
chr12	87420479	87420580	102	87420496	7	6.62122	5.00582	2.42067	peak1997
chr12	88636013	88636110	98	88636026	5	6.87018	4.91298	2.42067	peak1998
[truncated: 4,566 more rows]
