# Supplementary material for: Transcription factor TFCP2L1 patterns cells in the mouse kidney collecting ducts
Source: eLife. 2017 Jun 3;6:e24265. doi: 10.7554/eLife.24265 (PMC5484618; doi:10.7554/eLife.24265)
Supplement: Supplementary file 3. — DOI: http://dx.doi.org/10.7554/eLife.24265.027 [file elife-24265-supp3.xlsx]

## Sheet: Supplementary File 3
Supplementary File 3. Functional enrichement analysis of Tfcp2l1-bound genomic regions
# GREAT version 3.0.0
Species assembly: mm9
Association rule: Basal+extension: 5000 bp upstream, 1000 bp downstream, 1000000 bp max extension, curated regulatory domains included
The test set of 6,564 genomic regions picked 7,083 (33%) of all 21,176 genes.
PANTHER Pathway has 151 terms covering 2,234 (11%) of all 21,176 genes, and 5,225 term - gene associations.
151 ontology terms (100%) were tested using an annotation count range of [1, Inf].
# Term Name	Binom Rank	Binom Raw P-Value	Binom FDR Q-Val	Binom Fold Enrichment	Binom Observed Region Hits	Binom Region Set Coverage	Hyper Rank	Hyper FDR Q-Val	Hyper Fold Enrichment	Hyper Observed Gene Hits	Hyper Total Genes	Hyper Gene Set Coverage
Notch signaling pathway	2	4.217e-06	0.000318383	2.12636	45	0.00685558	24	0.0416356	1.6817	18	32	0.0025413
TCA cycle	4	0.000554345	0.0209265	4.45157	8	0.00121877	21	0.0300757	2.98969	5	5	0.000705916
Tfcp2l1 peak -> gene association table				gene -> Tfcp2l1 peak association table
Tfcp2l1 peak ID	associated gene (distance to peak)			associated gene	Tfcp2l1 peak ID (distance to gene)
peak37	Aph1b (-447)			Adam17	peak5180 (-1280), peak1869 (+53652)
peak87	Fut8 (+542568)			Aph1b	peak37 (-447)
peak213	Rbpj (-234972)			Dll1	peak5220 (+120987), peak2067 (+264225)
peak304	Notch2 (+85297)			Fut8	peak3819 (-152), peak6307 (+265482), peak1880 (+360157), peak376 (+457259), peak87 (+542568), peak1881 (+850855)
peak322	Ncor2 (+37748)			Hes1	peak5679 (-56202), peak5874 (-1823), peak3074 (+50028)
peak344	Ncor2 (+14212)			Hey1	peak5047 (-127494), peak443 (-336), peak4545 (+138049)
peak376	Fut8 (+457259)			Hey2	peak3787 (-212)
peak379	Mfng (+23455)			Heyl	peak779 (+6157)
peak443	Hey1 (-336)			Jag1	peak2709 (-904), peak2899 (-510)
peak513	Ncor2 (+97614)			Lfng	peak6219 (-28935)
peak530	Rfng (+7942)			Lnx1	peak4684 (-296558), peak6209 (-187259), peak3933 (-131366), peak2377 (-89474), peak6208 (-52531)
peak779	Heyl (+6157)			Mfng	peak379 (+23455)
peak912	Rfng (-5)			Ncor2	peak1288 (-75377), peak2406 (-4819), peak344 (+14212), peak322 (+37748), peak513 (+97614), peak5629 (+164626)
peak1288	Ncor2 (-75377)			Notch2	peak304 (+85297)
peak1719	Psen2 (+26607)			Notch4	peak6368 (+363)
peak1869	Adam17 (+53652)			Psen2	peak1719 (+26607), peak4061 (+41065)
peak1880	Fut8 (+360157)			Rbpj	peak4677 (-254849), peak5370 (-246374), peak213 (-234972), peak2935 (-229690), peak3729 (-210467)
peak1881	Fut8 (+850855)			Rfng	peak912 (-5), peak530 (+7942)
peak2067	Dll1 (+264225)
peak2377	Lnx1 (-89474)
peak2406	Ncor2 (-4819)
peak2709	Jag1 (-904)
peak2899	Jag1 (-510)
peak2935	Rbpj (-229690)
peak3074	Hes1 (+50028)
peak3729	Rbpj (-210467)
peak3787	Hey2 (-212)
peak3819	Fut8 (-152)
peak3933	Lnx1 (-131366)
peak4061	Psen2 (+41065)
peak4545	Hey1 (+138049)
peak4677	Rbpj (-254849)
peak4684	Lnx1 (-296558)
peak5047	Hey1 (-127494)
peak5180	Adam17 (-1280)
peak5220	Dll1 (+120987)
peak5370	Rbpj (-246374)
peak5629	Ncor2 (+164626)
peak5679	Hes1 (-56202)
peak5874	Hes1 (-1823)
peak6208	Lnx1 (-52531)
peak6209	Lnx1 (-187259)
peak6219	Lfng (-28935)
peak6307	Fut8 (+265482)
peak6368	Notch4 (+363)
