# Supplementary material for: Transcription factor TFCP2L1 patterns cells in the mouse kidney collecting ducts
Source: eLife. 2017 Jun 3;6:e24265. doi: 10.7554/eLife.24265 (PMC5484618; doi:10.7554/eLife.24265)
Supplement: Supplementary file 4. — DOI: http://dx.doi.org/10.7554/eLife.24265.028 [file elife-24265-supp4.xlsx]

## Sheet: Supplementary File 4
Supplementary File 4. Motif overrepresentation analysis of top 1000 Tfcp2l1-bound genomic regions
Motif enrichment analysis PWMEnrich
Neighboring motifs using top 1000 Tfcp2l1 peaks
Top 1000 Tfcp2l1 peaks from P1 kidney, Peak summits +/-20bp
rank	target	id	raw.score	p.value	top.motif.prop
1	Tcfcp2l1	Tcfcp2l1	142.248	4.0046e-18	0.563
3	Tcfap4	M0176_1.02	2.14911	5.97762e-13	0.237
4	Ascl2	M0178_1.02	3.28558	2.02191e-09	0.239
5	Tcfap2a	M0082_1.02	3.76683	4.41216e-08	0.313
6	Hand1::Tcfe2a	Hand1::Tcfe2a	3.1306	7.83005e-08	0.269
7	Tcfap2c	M0084_1.02	4.4471	9.16397e-08	0.317
8	Msc	M0195_1.02	1.55847	9.64608e-08	0.244
9	Sohlh2	M0198_1.02	1.18129	1.43515e-06	0.342
10	Tcf4	M0219_1.02	2.35758	2.3087e-06	0.196
11	Tcfap2e	M0085_1.02	3.04001	9.9034e-06	0.258
12	Atoh1	Atoh1	7.18111	1.85418e-05	0.04
13	Figla	M0203_1.02	2.4124	3.02807e-05	0.145
14	Hes1	M0191_1.02	1.43535	7.02143e-05	0.32
15	Tcfl5	M0212_1.02	1.61364	7.13357e-05	0.284
16	Myf6	M0209_1.02	1.39127	0.000100282	0.197
17	Myog	Myog	9.00271	0.000117038	0.047
18	Nhlh2	M0216_1.02	2.83282	0.00013845	0.161
19	Hes5	M0215_1.02	1.55335	0.00022251	0.306
20	Tcf12	Tcf12	7.35162	0.00065863	0.047
21	Tcf3	Tcf3	9.30067	0.000735893	0.061
22	Tcfap2b	M0083_1.02	3.02529	0.00129275	0.214
23	Obox6	Cell08/Obox6_3440.2_pwm.txt	3.97785	0.00129645	0.038
24	Myod1	Myod1	8.02652	0.00161108	0.06
26	Spdef	SCI09/Spdef_pwm_primary.txt	3.3171	0.00235701	0.192
30	Mafb	M0321_1.02	2.31147	0.00725882	0.147
